# 1 **DeeReCT-APA: Prediction of Alternative Polyadenylation Site** 2 **Usage Through Deep Learning**

3 Zhongxiao Li<sup>1,a</sup>, Yisheng Li<sup>2,b</sup>, Bin Zhang<sup>3,c</sup>, Yu Li<sup>1,d</sup>, Yongkang Long<sup>1,2,e</sup>, Jue Xiao  
4 Zhou<sup>2,f</sup>, Xudong Zou<sup>2,g</sup>, Min Zhang<sup>2,h</sup>, Yuhui Hu<sup>2,\*i</sup>, Wei Chen<sup>2,\*j</sup>, Xin Gao<sup>1,\*k</sup>

5 <sup>1</sup>*King Abdullah University of Science and Technology (KAUST), Computational*  
6 *Bioscience Research Center (CBRC), Computer, Electrical and Mathematical Sciences*  
7 *and Engineering (CEMSE) Division, Thuwal, 23955-6900, Saudi Arabia.*

8 <sup>2</sup>*Department of Biology, Southern University of Science and Technology (SUSTech),*  
9 *Shenzhen, 518055, China.*

10 <sup>3</sup>*Cancer Science Institute of Singapore, Singapore 117599, Singapore.*

11 \* Corresponding author.

12 E-mail: [huyh@sustech.edu.cn](mailto:huyh@sustech.edu.cn)(Hu Y), [chenw@sustech.edu.cn](mailto:chenw@sustech.edu.cn)(Chen W),

13 [xin.gao@kaust.edu.sa](mailto:xin.gao@kaust.edu.sa) (Gao X)

## 14 **Running title:**

15 *Li Z et al / DeeReCT-APA: Deep Learning Prediction of APA*

16 <sup>a</sup>ORCID: 0000-0003-2480-0750

17 <sup>b</sup>ORCID: 0000-0001-8015-7128

18 <sup>c</sup>ORCID: 0000-0001-8835-8370

19 <sup>d</sup>ORCID: 0000-0002-3664-6722

20 <sup>e</sup>ORCID: 0000-0003-0953-7325

21 <sup>f</sup>ORCID: 0000-0002-6739-6236

22 <sup>g</sup>ORCID: 0000-0002-2958-0438

23 <sup>h</sup>ORCID: 0000-0002-3462-3711

24 <sup>i</sup>ORCID: 0000-0002-5210-5301

25 <sup>j</sup>ORCID: 0000-0003-3263-1627

26 <sup>k</sup>ORCID: 0000-0002-7108-3574

27 Word count: 8762

28 Figure count: 7

29 Table count: 2

30 Supplementary Figures: 4

31 Supplementary Tables: 7

32 Reference Count: 42

- 33 Reference Count after 2014: 21
- 34 Count of letters in the article title: 78
- 35 Count of letters in the running title: 47
- 36 Count of keywords: 4
- 37 Count of words in abstract: 246
- 38
- 39

40 **Abstract**

41 Alternative polyadenylation (APA) is a crucial step in post-transcriptional regulation.  
42 Previous bioinformatic works have mainly focused on the recognition of  
43 polyadenylation sites (PAS) in a given genomic sequence, which is a binary  
44 classification problem. Recently, computational methods for predicting the usage level  
45 of alternative PAS in a same gene have been proposed. However, all of them cast the  
46 problem as a non-quantitative pairwise comparison task and do not take the competition  
47 among multiple PAS into account. To address this, here we propose a deep learning  
48 architecture, DeeReCT-APA, to quantitatively predict the usage of all alternative PAS  
49 of a given gene. To accommodate different genes with potentially different numbers of  
50 PAS, DeeReCT-APA treats the problem as a regression task with a variable-length  
51 target. Based on a CNN-LSTM architecture, DeeReCT-APA extracts sequence features  
52 with CNN layers, uses bidirectional LSTM to explicitly model the interactions among  
53 competing PAS, and outputs percentage scores representing the usage levels of all PAS  
54 of a gene. In addition to the fact that only our method can predict quantitatively the  
55 usage of all the PAS within a gene, we show that our method consistently outperforms  
56 other existing methods on three different tasks for which they are trained: pairwise  
57 comparison task, highest usage prediction task and ranking task. Finally, we  
58 demonstrate that our method can be used to predict the effect of genetic variations on  
59 APA patterns and shed light on future mechanistic understanding in APA regulation.  
60 Our code and data are available at <https://github.com/lzx325/DeeReCT-APA-repo>.

61

62 **KEYWORDS:** Polyadenylation; Gene regulation; Deep learning; Bioinformatics

## 63 **Introduction**

64 In eukaryotic cells, the termination of Pol II transcription involves 3'-end cleavage  
65 followed by addition of a poly(A) tail, a process termed as “polyadenylation”. Often,  
66 one gene could have multiple polyadenylation sites (PAS). The so-called alternative  
67 polyadenylation (APA) could generate from the same gene locus different transcript  
68 isoforms with different 3'-UTRs and sometimes even different protein coding  
69 sequences. The diverse 3'-UTRs generated by APA may contain different sets of *cis*-  
70 regulatory elements, thereby modulating the mRNA stability [1–3], translation [4],  
71 subcellular localization of mRNAs [5–7], or even the subcellular localization and  
72 function of the encoded proteins [8]. Importantly, it has been shown that dysregulation  
73 of APA could result in various human diseases [9–12].

74

75 APA is regulated by the interaction between *cis*-elements located in the vicinity of  
76 PAS and the associated *trans*-factors [13]. The most well-known *cis*-element that  
77 defines a PAS is the hexamer AAUAAA and its variants located 15-30nt upstream of  
78 the cleavage site, which is directly recognized by the cleavage and polyadenylation  
79 specificity factor (CPSF) components: CPSF30 and WDR33 [14]. Other auxiliary *cis*-  
80 elements located upstream or downstream of the cleavage site include upstream UGUA  
81 motifs bound by the cleavage factor Im (CFIm) and downstream U-rich or GU-rich  
82 elements targeted by the cleavage stimulation factor (CstF) [14]. The usage of  
83 individual PAS for a multi-PAS gene depends on how efficiently each alternative PAS  
84 is recognized by these 3' end processing machineries, which is further regulated by  
85 additional RNA binding proteins (RBPs) that could enhance or repress the usage of  
86 distinct PAS signals through binding in their proximity. In addition, the usage of  
87 alternative PAS is mutually exclusive. In particular, once an upstream PAS is utilized,  
88 all the downstream ones would have no chance to be used no matter how strong their  
89 PAS signals are. Therefore, proximal PAS, which are transcribed first, have positional  
90 advantage over the distal competing PAS [15]. Indeed, it has been observed that the  
91 terminal PAS more often contain the canonical AAUAAA hexamer, which is  
92 considered to have higher affinity than the other variants, which possibly compensates  
93 for their positional disadvantage [16].

94 There has been a long-standing interest in predicting PAS based on genomic  
95 sequences using purely computational approaches. The so-called “PAS recognition



96 problem” aims to discriminate between nucleotide sequences that contain a PAS and  
97 those do not. A variety of hand-crafted features have been proposed and statistical  
98 learning algorithms, *e.g.*, random forest (RF), support vector machines (SVM) and  
99 hidden Markov models (HMM), are then applied on these features to solve the binary  
100 classification problem [17–19]. Very recently researchers started investigating the  
101 “PAS quantification problem”, which aims to predict a score that represents the strength  
102 of a PAS [20, 21]. This is much more difficult than the recognition one.

103

104 Recent developments in deep learning have made great improvements on many tasks  
105 [22]. With remarkable success, it has also been applied to bioinformatics tasks such as  
106 protein-DNA binding [23], RNA splicing pattern prediction [24], enzyme function  
107 prediction [25, 26], Nanopore sequencing [27, 28], and promoter prediction [29]. Deep  
108 learning is favored due to its automatic feature extraction ability and good scalability  
109 with large amount of data. As for polyadenylation prediction, deep learning models  
110 have been applied on the PAS recognition problem and they outperformed existing  
111 feature-based methods by a large margin [30]. Recently, deep learning models have  
112 also been applied on the PAS quantification problem, where Polyadenylation Code [20]  
113 was developed to predict the stronger one from a given pair of two competing PAS.  
114 Very recently, another model, DeepPASTA [21] has been proposed. DeepPASTA  
115 contains four different modules that deal with both the PAS recognition problem and  
116 PAS quantification problem. Similar as Polyadenylation Code, DeepPASTA also casts  
117 the PAS quantification problem into a pairwise comparison task.

118

119 In this paper, we propose a novel deep learning method, DeeReCT-APA (Deep  
120 Regulatory Code and Tools for Alternative Polyadenylation), for the PAS  
121 quantification problem. DeeReCT-APA can quantitatively predict the usage of all the  
122 competing PAS from a same gene simultaneously, regardless of the number of PAS.  
123 The model is trained and evaluated based on the dataset from a previous study [31],  
124 which consists of a genome-wide PAS measurement of two different mouse strains  
125 (C57BL/6J (BL) and SPRET/EiJ (SP)), and their F1 hybrid. After training our model  
126 on the dataset, we comprehensively evaluate our model based on a number of criteria.  
127 We demonstrate the necessity of modeling the competition among multiple PAS  
128 simultaneously. Finally, we show that our model can predict the effect of genetic

129 variations on APA patterns, visualize APA regulatory motifs and potentially facilitate  
130 the mechanistic understanding of APA regulation.

131

## 132 **Methods**

### 133 **Description of DeeReCT-APA architecture**

134 The DeeReCT-APA method is based on a deep learning architecture that contains a set  
135 of neural network models composed of base networks (Base-Net, one for each  
136 competing PAS) and upper-level interaction layers. Each base network takes a 455nt  
137 long genomic DNA sequence centered around one competing PAS cleavage site as  
138 input and gives as output a vector which can be interpreted as the distilled features of  
139 that sequence. There are two types of base networks in our design, based on: (1) hand-  
140 engineered feature extractor and (2) convolutional neural networks (CNN). The output  
141 of the lower-level base network is then passed to the upper-level interaction layers,  
142 which computationally model the process of choosing competing PAS. The interaction  
143 layers of DeeReCT-APA are based on Long Short Term Memory Networks (LSTM)  
144 [32], which have achieved remarkable success in natural language processing and can  
145 naturally handle sentences with an arbitrary length, therefore suitable for handling any  
146 number of alternative PAS from a same gene locus. The interaction layers then output  
147 the percentage values of all the competing PAS of the gene. The architecture is  
148 illustrated in **Figure 1**. The design of each part of the network is further explained in  
149 the following subsections.

150

151 We use three different base network designs: deep neural network architectures  
152 based on a single 1D convolution layer (Single-Conv-Net), multiple 1D convolution  
153 layers (Multi-Conv-Net) and a handcrafted feature extractor with fully-connected  
154 layers (Feature-Net). Single-Conv-Net and Multi-Conv-Net are two convolutional  
155 neural network (CNN) structures for Base-Net. The Single-Conv-Net consists of only  
156 one layer of the 1D convolutional layer and takes directly the one-hot encoded  
157 sequences as input. The convolutional layer has a number of convolution filters which  
158 become automatically-learned feature extractors after training. A rectified linear unit  
159 (ReLU) is used as the activation function. The max-pooling operation after that allows  
160 only values from highly-activated neurons to pass to the upper fully-connected layers.  
161 The three operations: convolution, ReLU and max-pooling form a convolution block.

162 While the Single-Conv-Net uses one convolution block, the Multi-Conv-Net uses two  
163 convolution blocks before fully-connected layers. The increased depth of the network  
164 makes it possible for the network to learn more complex representations. The structures  
165 of Single-Conv-Net and Multi-Conv-Net are shown in **Figure 2A** and **Figure 2B**,  
166 respectively.

167

168 As a comparison, we also design a base network that works with hand engineered  
169 features which we call Feature-Net. The Feature-Net only consists of multiple fully-  
170 connected layers and takes as input multiple types of features extracted from the  
171 sequences of interest. The features, described in [20], include polyadenylation signals,  
172 auxiliary upstream elements, core upstream elements, core downstream elements,  
173 auxiliary downstream elements [33], RNA-binding protein motifs, as well as 1-mer, 2-  
174 mer, 3-mer, and 4-mer features (detailed in Supplementary Materials Section S1 and  
175 Supplementary Table S1). Each feature value corresponds to the occurrence of each  
176 motif. The extracted features are then z-score normalized. The architecture is illustrated  
177 in **Figure 2C**.

178

### 179 **Design of the interaction layers**

180 The utilization of alternative PAS is intrinsically competitive. On the one hand, as a  
181 multi-PAS gene is transcribed, any one of its PAS along the already transcribed region  
182 is possible to be used. But if one of them has already been used, it will make other PAS  
183 impossible to be chosen. On the other hand, given that the same polyadenylation  
184 machinery is used by all the alternative PAS, such competition of resources also  
185 contributes to the competitiveness of this process. However, previous work in  
186 polyadenylation usage prediction did not take this important point into account [20, 21].  
187 Both existing models, Polyadenylation Code and DeepPASTA (tissue-specific  
188 relatively dominant poly(A) sites prediction model, Section 2.3 in [21]) can only take  
189 in two PAS at a time, ignoring the competition with others. Here, to overcome this  
190 limitation, we consider all the competing PAS at the same time and take as input all the  
191 PAS in a gene simultaneously into our model, then jointly predict the usage levels of  
192 all of them.

193

194 To fulfil this, we design the interaction layers above the base networks to model the  
195 interaction between different PAS. In neural networks, the most common way to model  
196 interactions among inputs is to introduce a recurrent neural network (RNN) layer, which  
197 can capture the interdependencies among inputs corresponding to each time step. We  
198 decide to choose the LSTM [32] as the foundation of interaction layers. LSTM is a type  
199 of RNN that has hidden memory cells which are able to remember a state for an  
200 arbitrary length of time steps, making it one of the most popular RNNs. To fit into the  
201 PAS usage level prediction task, each time step of LSTM corresponds to one PAS, at  
202 which the LSTM takes the extracted features of that PAS from the lower-level base  
203 network. As there is both influence from upstream PAS to downstream PAS and vice  
204 versa, we decide to use a bidirectional LSTM (BiLSTM), in which one LSTM's time  
205 step goes from upstream PAS to downstream one and the other from downstream to  
206 upstream. The outputs of the two LSTMs at the same PAS are then concatenated and  
207 sent to the upper fully-connected layer. The fully-connected layer transforms the LSTM  
208 output to a scalar value representing the log-probability of that PAS to be used. After  
209 the log-probabilities of all competing PAS pass through a final SoftMax layer, they are  
210 transformed to properly normalized percentage scores, which sum up to one,  
211 representing their probability of being chosen. The detailed architecture is shown in  
212 Figure 1. We point out that, although DeepPASTA also contains a BiLSTM component,  
213 their BiLSTM layer is to process the sequence of one of the two competing PAS that  
214 are given as input. The time steps of the BiLSTM correspond to different positions in  
215 one particular sequence rather than to different PAS, and therefore the BiLSTM is not  
216 to model the interactions between different PAS, which is clearly different from the  
217 design in DeeReCT-APA.

218

219 As mentioned above, the aim of our model is to take all PAS of a gene as a whole  
220 and try to predict the usage level of each PAS as accurate as possible. Therefore, at one  
221 time, we must take all PAS in a gene as input. Considering that the number of PAS  
222 within a gene is not a constant, we design our model to take inputs of a variable length.  
223 Since most genes have a small number of PAS, we choose not to pad all the genes with  
224 dummy PAS to make them of the same length, otherwise it will be highly inefficient.  
225 Instead, we design the interaction layers in a way that it can take an arbitrary number  
226 of Base-Nets.

227 We further design two experiments for ablation study of DeeReCT-APA's BiLSTM  
228 interaction layer. The first is to remove the BiLSTM layer and only keep the fully-  
229 connected layer and the SoftMax layer. In this scenario, the network still considers all  
230 PAS of a gene simultaneously, but with a non-RNN interaction layer. The second is to  
231 remove the interaction layer altogether and use comparison-based training (like in  
232 Polyadenylation Code) to train a Base-Net. We show their performance separately in  
233 the "Overall Performance" section.

### 234 **A genome-wide PAS quantification dataset derived from fibroblast cells of** 235 **C57BL/6J (BL) and SPRET/EiJ (SP) mouse and their F1 hybrid**

236 A genome-wide PAS quantification dataset derived from fibroblast cells of C57BL/6J  
237 (BL) and SPRET/EiJ (SP), as well as their F1 hybrid is obtained from the previous  
238 study [31]. In the F1 cells, the two alleles have the same *trans* environment and the PAS  
239 usage difference between two alleles can only be due to the sequence variants between  
240 their genome sequences, making it a valuable system for APA *cis*-regulation study.  
241 Apart from APA, this kind of systems have also been used in the study of alternative  
242 splicing and translational regulation [34, 35].

243

244 The detailed description of the sequencing protocol and data analysis procedure can  
245 be found in [31]. As a brief summary, the study uses fibroblast cell lines from BL, SP  
246 and their F1 hybrids. The total RNA is extracted from fibroblast cells of BL and SP  
247 undergoes 3'-Region Extraction and Deep Sequencing (3'READS) [16] to build a good  
248 PAS reference of the two strains. The 3'-mRNA sequencing is then performed in all  
249 three cell lines to quantify those PAS in the reference. In the F1 hybrid cell, reads are  
250 assigned to BL and SP alleles according to their strain specific SNPs. The PAS usage  
251 values are then computed by counting the sequencing reads assigned to each PAS. The  
252 sequence centering around each PAS cleavage site (448nt in total) is extracted and  
253 undergoes feature extraction or one-hot encoding before training the model. The  
254 extracted features are then inputted to Feature-Net, while the one-hot encoded  
255 sequences are inputted to Single-Conv-Net and Multi-Conv-Net.

### 256 **Training and evaluation of the model**

257 We train the DeeReCT-APA models based on the parental BL/SP PAS usage level  
258 dataset. For F1 hybrid data, however, we choose to start from the pre-trained parental

259 model (which we use either the BL parental model or the SP parental model and the  
260 results are shown separately) and fine-tune the model on the F1 dataset. This is because,  
261 due to the read assignment problem, the usage of many PAS in F1 cannot be  
262 unambiguously characterized by 3'-mRNA sequencing [31]. As a result, the F1 dataset  
263 does not contain enough number of PAS to train our model from scratch. At the training  
264 stage, genes are randomly selected from the training set and the sequences of their PAS  
265 flanking regions are fed into the network. Each sequence of PAS in a gene passes  
266 through one Base-Net. The parameters of the Base-Net that are responsible for each  
267 PAS are all shared. The Base-Net then each outputs a vector representing distilled  
268 features for each PAS, which is then sent to the interaction layers. The interaction layers  
269 generate a percentage score of each PAS of this gene. Cross-entropy loss between the  
270 predicted usage and the actual usage is used as the training target. During back-  
271 propagation, the gradients are back-propagated through the passage originated from  
272 each PAS. As the model parameters are shared between base networks, the gradients  
273 are then summed up to update the model parameters. We use several techniques to  
274 reduce overfitting: (1) Weight decay is applied on weight parameters of CNN and all  
275 fully-connected layers. (2) Dropout is applied on BiLSTM. (3) We stop training as soon  
276 as the mean absolute error of the predicted usage value does not improve on the  
277 validation set. (4) While fine-tuning the model on F1 dataset, we use a learning rate that  
278 is ~100 times smaller than the one used when training from scratch.

279

280 The network is trained with the adaptive moment estimation (Adam) optimizer [36].  
281 A detailed list of hyperparameters we used is specified in Supplementary Materials  
282 Section S2 and Supplementary Table S2. We construct the network using the PyTorch  
283 deep learning framework [37] and utilize one NVIDIA GeForce GTX 980 Ti as the  
284 GPU hardware platform.

285

286 To evaluate the performance of the model, we conduct a 5-fold cross validation at  
287 the gene level using all the genes in our dataset for each strain. That is, if a gene is  
288 selected as a training (testing) sample, all of its PAS are in the train (test) set. At each  
289 time, four folds are used for training and the remaining one is used for testing. To make  
290 a fair comparison with Polyadenylation Code and DeepPASTA in Section 3.1, we also  
291 train (fine-tune) the two models and optimize their model parameters on the parental  
292 and F1 datasets.

293

## 294 **Performance measures**

295 To comprehensively evaluate DeeReCT-APA and compare it against baseline and  
296 state-of-the-art methods, we use the following performance measures.

297 *Mean Absolute Error (MAE)*. This metric is defined as the mean absolute error  
298 (MAE) of the usage prediction of each PAS, which is

$$MAE = \frac{1}{M} \sum_{i=1}^M |p_i - t_i| \quad (1)$$

299 where  $p_i$  stands for the predicted usage,  $t_i$  stands for the experimentally determined  
300 ground truth usage for PAS  $i$  and  $M$  is the total number of PAS across all genes in the  
301 test set. This is the most intuitive way of measuring the performance of DeeReCT-APA.  
302 However, it is not applicable to Polyadenylation Code [20] or DeepPASTA [21] as they  
303 do not have quantitative outputs that can be interpreted as the PAS usage values. For  
304 the same reason, it is not applicable to DeeReCT-APA either, when its interaction layers  
305 are removed and use comparison-based training (Section “Design of the interaction  
306 layers”).

307 *Comparison Accuracy*. We here define the Pairwise Comparison Task. We  
308 enumerate all the pairs of PAS in a given gene and keep those pairs with PAS usage  
309 level difference greater than 5%. We then ask the model to predict which PAS in the  
310 pair is of the higher usage level. The accuracy is defined as,

$$Comparison\ Accuracy = \frac{\# Pairs\ Correctly\ Predicted}{\# All\ Pairs}. \quad (2)$$

311 Note that the primary reason that we use this metric is to compare with Polyadenylation  
312 Code and DeepPASTA, as they were designed for predicting which one is stronger  
313 between the two competing PAS.

314 *Highest Usage Prediction Accuracy*. We here define the Highest Usage Prediction  
315 Task. This task aims to test the model’s ability of predicting which PAS is of the highest  
316 usage level in a single gene. We select all the genes which has its highest PAS usage  
317 level greater than its second highest one by at least 15% in the test set for evaluation.  
318 For DeeReCT-APA, the predicted usage in percentage is used for ranking the PAS. For  
319 Polyadenylation Code and DeepPASTA, as they do not provide a predicted value in  
320 percentage, the logit value before the SoftMax layer is used instead. The logit values,  
321 though not in the scale of real usage percentage values, can at least give a ranking of



322 different PAS sites. The highest usage prediction accuracy is the percentage of genes  
323 whose highest-usage PAS are correctly predicted.

324 *Averaged Spearman's Correlation.* We here define the Ranking Task. We convert  
325 the predicted usage levels by each model into a ranking of PAS sites in that gene. We  
326 then compute the Spearman's correlation between the predicted ranking and ground  
327 truth ranking. The correlation values for all genes are then averaged together to give an  
328 aggregated score. In other words,

*Averaged Spearman's Correlation*

$$= \frac{1}{N} \sum_{i=1}^N \frac{\sum_{p=1}^{P_i} (pr_{ip} - \bar{pr}_i)(gr_{ip} - \bar{gr}_i)}{\sqrt{\sum_{p=1}^{P_i} (pr_{ip} - \bar{pr}_i)^2} \sqrt{\sum_{p=1}^{P_i} (gr_{ip} - \bar{gr}_i)^2}} \quad (3)$$

329 where  $N$  is the total number of genes,  $P_i$  is the number of PAS in gene  $i$ ,  $pr_{ip}$  is the  
330 predicted rank of PAS  $p$  in gene  $i$ ,  $gr_{ip}$  is the ground truth rank of PAS  $p$  in gene  $i$ ,  $\bar{pr}_i$   
331 and  $\bar{gr}_i$  are averaged predicted and ground truth ranks in gene  $i$ , respectively.

332

## 333 **Results**

### 334 **Overall performance**

335 First, to compare the performance of different Base-Net designs, we evaluated  
336 DeeReCT-APA with different Base-Nets: Feature-Net, Single-Conv-Net, and Multi-  
337 Conv-Net. As shown in Supplementary Table S3, both on the parental BL dataset and  
338 on the F1 dataset, DeeReCT-APA with Multi-Conv-Net performs the best, followed by  
339 that with Single-Conv-Net. This is expected, as deeper neural networks have higher  
340 representation learning capacity.

341

342 We then compared the performance of DeeReCT-APA with Multi-Conv-Net to  
343 Polyadenylation Code and DeepPASTA. As shown in **Table 1**, both on the parental BL  
344 dataset and on the F1 dataset, DeeReCT-APA with Multi-Conv-Net consistently  
345 performs the best across all four metrics. The standard deviation across 5-fold cross  
346 validation is higher in the F1 dataset than in the parental dataset, indicating the  
347 increased instability in F1 prediction which is probably due to the limited amount of F1  
348 data. As we have a rather small dataset, a very complex model like DeepPASTA is  
349 prone to overfitting, which is probably the reason why it performs the worst here.  
350 Indeed, for the smaller F1 dataset, DeepPASTA lags even more behind other methods.



351 Similar results on the parental SP dataset and the performance of F1 model that is fine-  
352 tuned from the SP parental model are shown in Supplementary Materials Section S3  
353 and Supplementary Table S4. Unless otherwise stated, the F1 model that we use in the  
354 remaining part of the paper is the one fine-tuned from the parental BL model and using  
355 the training set folds that do not include the gene or PAS to be tested.

356

357 Next, we show that, in terms of comparison accuracy, the improvement made by  
358 DeeReCT-APA is statistically significant, even though the performance improvement  
359 is not numerically substantial. For this purpose, we repeat the experiment for five times,  
360 with each of them having the dataset randomly split in a different way, and report the  
361 accuracy of DeeReCT-APA (Multi-Conv-Net), Polyadenylation Code, and  
362 DeepPASTA after 5-fold cross validation (Supplementary Materials Section S4 and  
363 Supplementary Table S5). The performance of three tools is then compared with p-  
364 value computed by t-test. As shown in Supplementary Table S5, indeed the  
365 improvement of DeeReCT-APA over the other two methods is statistically significant.

366

367

368 To demonstrate that the results of our comparison is independent of the datasets, we  
369 train and test DeeReCT-APA also on another dataset used in [20]. Since it consists of  
370 polyadenylation quantification data from multiple human tissues, we report the  
371 performance (comparison accuracy) of DeeReCT-APA for each tissue separately  
372 (Supplementary Materials Section S4 and Supplementary Table S6). The performance  
373 metrics of Polyadenylation Code and DeepPASTA is adapted from [20] and [21]  
374 accordingly. For 6 out of 8 tissues, DeeReCT-APA achieves higher accuracy than the  
375 other two methods.

376

377 We finally show through ablation study that the usage of BiLSTM interaction layer  
378 contributes to the performance of DeeReCT-APA. As shown in **Table 2**, we compare  
379 the performance of DeeReCT-APA with Multi-Conv-Net (1) without interaction layer,  
380 to (2) with interaction layer but without BiLSTM, and (3) with interaction layer and  
381 with BiLSTM (The detailed architectures are shown in Supplementary Figure S1). In  
382 terms of all metrics, both the usage of interaction layer and BiLSTM improve the  
383 performance. Although not numerically substantial, the improvements are in general  
384 statistically significant after performing a similar experiment as we have done earlier

385 (Supplementary Table S7). The improvement of (2) over (1) ( $p=2.5e-6$  for parental and  
386  $p=1.1e-3$  for F1) is more statistically significant than (3) over (2) ( $p=3.7e-3$  for parental  
387 and  $p=9.9e-2$  for F1) indicating that the majority of the performance gain of DeeReCT-  
388 APA comes from using the interaction layers and the simultaneous consideration of all  
389 PAS. This concludes that DeeReCT-APA, with an RNN interaction layer that considers  
390 all PAS of a gene at the same time, can achieve better performance on the PAS  
391 quantification task.

392

### 393 **Benefits of modelling all PAS jointly—one example**

394 To illustrate DeeReCT-APA's ability of modeling all PAS of a gene jointly, we use  
395 the gene *Srr* (Ensembl Gene ID: ENSMUSG000000001323) as an example. As shown  
396 in **Figure 3A**, the gene *Srr* use four different PAS, whereas **Figure 3B, 3C, 3D** shows  
397 the ground truth usage level, the prediction of DeeReCT-APA with Multi-Conv-Net  
398 and Polyadenylation Code, in the F1 hybrid cell for those four PAS, for both its BL  
399 allele (blue bars) and SP allele (green bars), respectively. As before, the logits values  
400 before the SoftMax layer of Polyadenylation Code are used as surrogates for predicted  
401 usage values (and therefore not in the range from 0 to 1). As shown in **Figure 3**, the  
402 prediction of DeeReCT-APA is much more consistent with the ground truth than that  
403 of Polyadenylation Code and the relative magnitude between the BL allele and SP allele  
404 for the prediction of DeeReCT-APA is correct for all four PAS. In comparison,  
405 Polyadenylation Code model predicted PAS 4 in the BL allele to be of slightly *higher*  
406 usage than the one in the SP allele whereas both in ground truth and the prediction made  
407 by DeeReCT-APA, the reverse is true. We hypothesize in this case that the genetic  
408 variants between the BL allele and SP allele in the sequences flanking PAS 4 alone  
409 might make the BL allele a *stronger* PAS than the SP allele because Polyadenylation  
410 Code only considers which one between the two is stronger and predicts the strength of  
411 a PAS solely by its own sequence, without considering those of the others. However,  
412 when simultaneously considering genetic variations in PAS 1, PAS 2, and PAS 3, which  
413 probably have *stronger* effects, the usage of PAS 4 becomes *lower* in BL than in SP.

414 To test our hypothesis, we design an *in-silico* experiment by constructing a  
415 hypothetical allele of gene *Srr* (hereafter referred to as “mixed allele”) that has the BL  
416 sequence of PAS 1, PAS 2, and PAS 3, and SP sequence of PAS 4. We then ask the  
417 DeeReCT-APA model to predict the usage level of each PAS in the “mixed allele”,

418 where the usage differences between the BL allele and the “mixed allele” should then  
419 be purely due to the sequence variants in PAS 4 because the two alleles are exactly the  
420 same on the other PAS. As shown in **Figure 3E**, consistent with our hypothesis, the  
421 usage level of PAS 4 in the BL allele is indeed *higher* than that in the “mixed allele”.  
422 This example nicely demonstrates the benefit of jointly modeling all the PAS in a gene  
423 simultaneously.

#### 424 **Allelic difference in PAS usage between BL and SP**

425 One primary goal of developing DeeReCT-APA is to determine the effect of sequence  
426 variants on APA patterns. The F1 hybrid system we choose here is ideal to test how  
427 well such a goal is achieved, since in the F1 cells, the allelic difference in PAS usage  
428 can only be due to the sequence variants between their genome sequences.

429

430 **Figure 4** shows two examples: gene *Zfp709* (Ensembl Gene  
431 ID:ENSMUSG00000056019) and *Lpar2* (Ensembl Gene ID:  
432 ENSMUSG00000031861), where previous analysis demonstrated that in the distal PAS  
433 of gene *Zfp709*, a substitution (from A to T) in the SP allele relative to the BL allele  
434 disrupted the PAS signal (ATTAAA to TTAAA) (**Figure 4A**); in the distal PAS of  
435 gene *Lpar2*, a substitution (from A to G) in the SP allele relative to the BL allele  
436 disrupted another PAS signal (AATAAA to AATAAG) (**Figure 4B**), causing both of  
437 them to be of lower usage in the SP allele than in the BL allele.

438

439 To check whether our model could be used to identify the effects of these variants,  
440 we plot a “mutation map” for the two genes. In brief, for each gene, given the sequence  
441 around the most distal PAS (suppose it is of length L), we generate 3L “mutated  
442 sequences”. Each one of the 3L sequences has exactly one nucleotide mutated from the  
443 original sequence. These 3L sequences are then fed into the model along with other  
444 PAS sequences from that gene and the model then predicts usage for all sites and for  
445 each of the 3L sequences, separately. The predicted usage values of the original  
446 sequence are then subtracted from each of the 3L predictions and plotted in a heatmap,  
447 the “mutation map”.

448

449 As shown in **Figure 4C** and **Figure 4D**, the heatmap entries that correspond to the  
450 sequence variants between BL and SP is consistent with experimental findings from

451 [31] (**Figure 4A and Figure 4B**). In addition, the mutation maps can also show the  
452 predicted effect of sequence variants other than those between BL and SP, giving an  
453 overview of the effects from all potential mutations.

454

455 Obviously, the two examples described above involved sequence variants disrupting  
456 PAS signals, which makes the prediction relatively trivial. To check whether our model  
457 could be used for the variants with more subtle effect, we choose a third example, gene  
458 *Alg10b*. Previous experiments showed that the usage of the most distal PAS of its BL  
459 allele is higher than its SP allele (**Figure 5A**). Using reporter assays (**Figure 5B**), it has  
460 been demonstrated that [31] an insertion of UUUU in the SP allele relative to the BL  
461 allele contributes to this reduction in usage (**Figure 5C**). To check whether DeeReCT-  
462 APA could reveal such effects, we also construct the same four *in silico* sequences as  
463 in [31] : BL, SP, BL2SP, and SP2BL. Together with other PAS of gene *Alg10b*, the  
464 four sequences are feed to the DeeReCT-APA model, separately. As shown in **Figure**  
465 **5D**, comparing BL with BL2SP and SP with SP2BL, our model is able to reveal the  
466 negative effect of poly(U) tract.

467

468 To globally evaluate the performance of DeeReCT-APA on predicting the allelic  
469 difference in PAS usage, we compare the predicted allelic difference versus  
470 experimentally measured allelic difference in a genome-wide manner (**Figure 6A**). As  
471 a baseline control, we do the same for the prediction made by the Polyadenylation Code  
472 where logit values before SoftMax are again used as surrogates for the predicted allelic  
473 difference in PAS usage (**Figure 6B**). Here, the F1 model fine-tuned from the BL  
474 parental model is used. Similar results of the F1 model fine-tuned from the SP parental  
475 model are shown in Supplementary Materials Section S3 and Supplementary Figure S2.  
476 It is worth noting that this is a very challenging task because the training data do not  
477 well represent the complete landscape of genetic mutations. That is, the BL dataset only  
478 contains invariant sequences from different PAS, and the F1 dataset contains a limited  
479 number of genetic variants.

480

481 We then compute the Pearson correlation between the experimentally measured  
482 allelic usage difference and the ones predicted by the two models. Clearly, DeeReCT-  
483 APA outperforms Polyadenylation Code. We further evaluate the Pearson correlation  
484 values using six subsets of the test set, each filtering out PAS with allelic usage

485 difference less than 0.1, 0.2, 0.3, 0.4, 0.6, 0.8, respectively (**Figure 6, Panel C**). When  
486 the allelic usage difference is small, their relative magnitudes are more ambiguous and  
487 the experimental measurement of their allelic usage difference (used here as ground  
488 truth) are less confident. Indeed, with the increasing allelic difference, the prediction  
489 accuracy increased for both DeeReCT-APA and Polyadenylation Code. Importantly, in  
490 all these groups, DeeReCT-APA shows consistently better performance.

#### 491 **Visualization of convolutional filters**

492 To show the knowledge learned by the convolutional filters of DeeReCT-APA, we  
493 follow a similar procedure as in [36] to visualize the convolutional filters of the model.  
494 The aim of visualization is to reveal the important subsequences around  
495 polyadenylation sites that activate a specific convolutional filter. In contrast to [38], in  
496 which the researchers only used sequences in the test set for visualization, we use all  
497 sequences in the train and test dataset of F1 for visualization due to the smaller size of  
498 our dataset. In visualization, neither the model parameters nor the hyperparameters are  
499 tuned on the test set, our usage of test set for visualization is therefore legitimate. For  
500 all the learned filters in layer 1, we convolve them with all the sequences in the above  
501 dataset, and for each sequence, its subsequence (having the same size as the filters) with  
502 the highest activation on that filter is extracted and accumulated in a position frequency  
503 matrix (PFM). The PFM is then ready for visualization as the knowledge learned by  
504 that specific filter. For layer 2 convolutional filters, as they do not convolve with raw  
505 sequences during training and testing, directly convolving it with the sequences in the  
506 dataset as we did for layer 1 would be undesirable. Instead, the layer 2 activations are  
507 calculated by a partial forward pass in the network and the subsequences of the input  
508 sequences in the receptive field of the maximally-activated neuron is extracted and  
509 accumulated in a PFM.

510 As shown in **Figure 7A** and **7B**, DeeReCT-APA is able to identify the two strongest  
511 PAS hexamer, AUUAAA and AAUAAA [31]. In addition, one of the layer 2  
512 convolutional filters is able to recognize the pattern of a mouse specific PAS hexamer  
513 UUUAAA [30] (**Figure 7C**). Furthermore, a Poly-U island motif previously reported  
514 in [38] could also be revealed by DeeReCT-APA (**Figure 7D**). A complete  
515 visualization of all the 40 filters in layer 1 and 40 filters in layer 2 is shown in  
516 Supplementary Figure S3 and Supplementary Figure S4.

517

## 518 **Discussion and conclusion**

519 In this study, we made the first attempt to simultaneously predict the usage of all  
520 competing PAS within a gene. Our method incorporates both sequence-specific  
521 information through automatic feature extraction by CNN and multiple PAS  
522 competition through interaction modeling by RNN. We trained and evaluated our  
523 model on the genome-wide PAS usage measurement obtained from 3'-mRNA  
524 sequencing of fibroblast cells from two mouse strains as well as their F1 hybrid. Our  
525 model, DeeReCT-APA, outperforms the state-of-the-art PAS quantification methods  
526 on the tasks that they are trained for, including pairwise comparison, highest usage  
527 prediction and ranking task. In addition, we demonstrated that modeling all the PAS of  
528 a gene simultaneously captures the mechanistic competition among the PAS and  
529 reveals the genetic variants with regulatory effects on PAS usage.

530

531 A similar idea of using BiLSTM to model competitive biological processes was  
532 proposed recently in [39]. The researchers used BiLSTM to model the usage level of  
533 competitive alternative 5'/3' splice sites. Given the similarity of modeling competing  
534 polyadenylation sites and splice sites, it is therefore not surprising that DeeReCT-APA,  
535 which also incorporates BiLSTM to model the interactions among competing  
536 polyadenylation sites, achieves the best performance on the PAS quantification task.

537

538 Although DeeReCT-APA provides the first-of-its-kind method to model all the PAS  
539 of a gene, it still has room for improvement. As shown in Figure 3, the model has limited  
540 accuracy when the usage is very high or very low (comparing Figure 3B and Figure  
541 3C). In addition, for allelic comparison as shown in Figure 5, some PAS with high  
542 allelic usage difference are predicted to be of low difference (false negatives, along X  
543 axis) and vice versa (false positives, along Y axis). One of the main reasons for our  
544 model's limitation, as well as for all the other PAS quantification methods, is that all  
545 the existing genome-wide PAS quantification datasets used as training data could only  
546 sample the limited number of naturally occurring sequence variants. Although in our  
547 study the two parental strains from which the F1 hybrid mouse was derived are already  
548 the evolutionarily most distant ones among all the 17 mouse strains with complete  
549 genomic sequences, the number of genetic variants is still rather limited. To address  
550 this limitation and provide a complementary dataset, we are working on establishing a

551 large-scale synthetic APA mini-gene reporter-based system which samples the  
552 regulatory effect of millions of random sequences (manuscript in preparation). Another  
553 limitation of our current model lies in the fact that it does not take all the factors with  
554 potential PAS regulatory effects into consideration. For example, transcription kinetics,  
555 i.e., the elongation rate of Pol II, which is not considered by the model in this study,  
556 can also affect APA choice [40]. Similarly, DeeReCT-APA does not take the distance  
557 between consecutive PAS into account, which, together with the transcription  
558 elongation rate, can also affect APA [41]. All of them are potential directions for further  
559 improvement.

560

561 Finally, very recently, Zhang et al. showed that effectively combining the power of  
562 deep learning and the information in RNA-seq data can significantly boost the  
563 performance for investigating the pattern of alternative splicing [42]. Indeed, our  
564 preliminary results showed that also for the recognition of APA patterns, there are  
565 substantial cases in which deep learning cannot make accurate prediction but utilizing  
566 the pattern of RNA-seq coverage around the cleavage site could provide clear evidence,  
567 and vice versa. Future work integrating the strength of deep learning on genomic  
568 sequences and experimental RNA-seq data will for certain not only improve the model  
569 performance, but also shed more light on the APA regulatory mechanisms.

570



## 571 **Data Availability**

572 Our implementation of DeeReCT-APA using the PyTorch [37] library is available  
573 at the repository (<https://github.com/lzx325/DeeReCT-APA-repo>). The genome-wide  
574 PAS quantification dataset of parental and F1 mouse fibroblast cell is available in the  
575 subfolder `APA\_ML`. As provided in [31], the raw sequencing data from which this  
576 dataset is derived is accessible at European Nucleotide Archive  
577 (<http://www.ebi.ac.uk/ena>) under the accession number PRJEB15336 (URL:  
578 <https://www.ebi.ac.uk/ena/browser/view/PRJEB15336>).

579

## 580 **Authors' contributions**

581 ZL, YH, WC, and XG conceived the project. ZL developed the deep learning model  
582 and did the computational experiments. Yisheng Li and BZ provided and pre-processed  
583 the dataset. JZ, XZ, and MZ provided additional biological insights on the experimental  
584 results. ZL, YH, WC, and XG drafted the paper. ZL, Yisheng Li, BZ, Yu Li, Yongkang  
585 Long, JZ, XZ, MZ, YH, WC, and XG read and approved the final manuscript.

586

## 587 **Competing interests**

588 The authors have declared no competing interests.

589

## 590 **Acknowledgements**

591 This work was supported by the King Abdullah University of Science and  
592 Technology (KAUST) Office of Sponsored Research (OSR) under Awards No.  
593 URF/1/4098-01-01, BAS/1/1624-01, FCC/1/1976-18-01, FCC/1/1976-23-01,  
594 FCC/1/1976-25-01, FCC/1/1976-26-01, and FCS/1/4102-02-01; by the  
595 International Cooperation Research Grant [No. GJHZ20170310161947503] from  
596 Science and Technology Innovation Commission of Shenzhen Municipal Government  
597 (YH); and by The Shenzhen Science and Technology Program (Grant No. :  
598 KQTD20180411143432337) (YH and WC).

599



600

601

## 602 **References**

603

604 [1] Barreau C, Paillard L, Osborne HB. AU-rich elements and associated factors: are  
605 there unifying principles? *Nucleic Acids Res.* 2005;33:7138-50.

606 [2] Chen CY, Shyu AB. AU-rich elements: characterization and importance in mRNA  
607 degradation. *Trends Biochem Sci* 1995;20:465–70.

608 [3] Jonas S, Izaurralde E. Towards a molecular understanding of microRNA-mediated  
609 gene silencing. *Nat Rev Genet* 2015;16:421–33.

610 [4] Lau AG, Irier HA, Gu J, Tian D, Ku L, Liu G, et al. Distinct 3'UTRs differentially  
611 regulate activity-dependent translation of brain-derived neurotrophic factor (BDNF).  
612 *Proc Natl Acad Sci U S A* 2010;107:15945–50.

613 [5] Bertrand E, Chartrand P, Schaefer M, Shenoy SM, Singer RH, Long RM.  
614 Localization of ASH1 mRNA particles in living yeast. *Mol. Cell* 1998;2:437–45.

615 [6] Ephrussi A, Dickinson LK, Lehmann R. Oskar organizes the germ plasm and directs  
616 localization of the posterior determinant nanos. *Cell* 1991;66:37–50.

617 [7] Niedner A, Edelmann FT, Niessing D. Of social molecules: The interactive  
618 assembly of ASH1 mRNA-transport complexes in yeast. *RNA Biol* 2014;11:998–1009.

619 [8] Berkovits BD, Mayr C. Alternative 3' UTRs act as scaffolds to regulate membrane  
620 protein localization. *Nature* 2015;522:363–7.

621 [9] Yasuda M, Shabbeer J, Osawa M, Desnick RJ. Fabry disease: novel alpha-  
622 galactosidase A 3'-terminal mutations result in multiple transcripts due to aberrant 3'-  
623 end formation. *Am J Hum Genet* 2003;73:162–73.

624 [10] Bennett CL, Brunkow ME, Ramsdell F, O'Brian KC, Zhu Q, Fuleihan RL, et al.  
625 A rare polyadenylation signal mutation of the FOXP3 gene (AAUAAA-->AAUGAA)  
626 leads to the IPEX syndrome. *Immunogenetics* 2001;53:435–9.

627 [11] Higgs DR, Goodbourn SE, Lamb J, Clegg JB, Weatherall DJ, Proudfoot NJ.  
628 Alpha-thalassaemia caused by a polyadenylation signal mutation. *Nature*  
629 1983;306:398–400.

630 [12] Orkin SH, Cheng TC, Antonarakis SE, Kazazian HH, Jr. Thalassaemia due to a  
631 mutation in the cleavage-polyadenylation signal of the human beta-globin gene. *Embo j*  
632 1985;4:453–6.

633 [13] Elkon R, Ugalde AP, Agami R. Alternative cleavage and polyadenylation: extent,  
634 regulation and function. *Nat Rev Genet* 2013;14:496-506.

635 [14] Mandel CR, Bai Y, Tong L. Protein factors in pre-mRNA 3' -end processing.  
636 *Cellular and Molecular Life Sciences* 2008;65:1099 - 122.

637 [15] Shi Y. Alternative polyadenylation: new insights from global analyses. *RNA*  
638 2012;18:2105-17.

639 [16] Hoque M, Ji Z, Zheng D, Luo W, Li W, You B, et al. Analysis of alternative  
640 cleavage and polyadenylation by 3' region extraction and deep sequencing. *Nat*  
641 *Methods* 2013;10:133–9.

642 [17] Kalkatawi M, Rangkuti F, Schramm M, Jankovic BR, Kamau A, Chowdhary R, et  
643 al. Dragon PolyA Spotter: predictor of poly(A) motifs within human genomic DNA  
644 sequences. *Bioinformatics (Oxford, England)* 2012;28:127–9.

645 [18] Magana-Mora A, Kalkatawi M, Bajic VB. Omni-PolyA: a method and tool for  
646 accurate recognition of Poly(A) signals in human genomic DNA. *BMC Genomics*  
647 2017;18:620.

- 648 [19] Xie B, Jankovic BR, Bajic VB, Song L, Gao X. Poly(A) motif prediction using  
649 spectral latent features from human DNA sequences. *Bioinformatics* 2013;29:i316–25.
- 650 [20] Leung MKK, Delong A, Frey BJ. Inference of the human polyadenylation code.  
651 *Bioinformatics* 2018;34:2889–98.
- 652 [21] Arefeen A, Xiao X, Jiang T. DeepPASTA: deep neural network based  
653 polyadenylation site analysis. *Bioinformatics* 2019;35:4577–85.
- 654 [22] LeCun Y, Bengio Y, Hinton G. Deep learning. *Nature* 2015;521:436–44.
- 655 [23] Alipanahi B, Delong A, Weirauch MT, Frey BJ. Predicting the sequence  
656 specificities of DNA- and RNA-binding proteins by deep learning. *Nat Biotech*  
657 2015;33:831–8.
- 658 [24] Leung MK, Xiong HY, Lee LJ, Frey BJ. Deep learning of the tissue-regulated  
659 splicing code. *Bioinformatics* 2014;30:i121–9.
- 660 [25] Li Y, Wang S, Umarov R, Xie B, Fan M, Li L, et al. DEEPre: sequence-based  
661 enzyme EC number prediction by deep learning. *Bioinformatics* 2018;34:760–9.
- 662 [26] Zou Z, Tian S, Gao X, Li Y. mlDEEPre: Multi-Functional Enzyme Function  
663 Prediction With Hierarchical Multi-Label Deep Learning. *Frontiers in Genetics* 2019;9.
- 664 [27] Han R, Li Y, Wang S, Gao X, Bi C, Li M. DeepSimulator: a deep simulator for  
665 Nanopore sequencing. *Bioinformatics* 2018;34:2899–908.
- 666 [28] Wang S, Li Z, Yu Y, Gao X. WaveNano: a signal-level nanopore base-caller via  
667 simultaneous prediction of nucleotide labels and move labels through bi-directional  
668 WaveNets. *Quantitative Biology* 2018;6:359–68.
- 669 [29] Umarov R, Kuwahara H, Li Y, Gao X, Solovyev V. Promoter analysis and  
670 prediction in the human genome using sequence-based deep learning models.  
671 *Bioinformatics* 2019;35:2730–7.
- 672 [30] Xia Z, Li Y, Zhang B, Li Z, Hu Y, Chen W, et al. DeeReCT-PolyA: a robust and  
673 generic deep learning method for PAS identification. *Bioinformatics* 2019;35:2371–9.
- 674 [31] Xiao MS, Zhang B, Li YS, Gao Q, Sun W, Chen W. Global analysis of regulatory  
675 divergence in the evolution of mouse alternative polyadenylation. *Molecular Systems*  
676 *Biology* 2016;12:890.
- 677 [32] Hochreiter S, Schmidhuber J. Long Short-Term Memory. *Neural Computation*  
678 1997;9:1735–80.
- 679 [33] Hu J, Lutz CS, Wilusz J, Tian B. Bioinformatic identification of candidate cis-  
680 regulatory elements involved in human mRNA polyadenylation. *RNA* 2005;11:1485–  
681 93.
- 682 [34] Gao Q, Sun W, Ballegeer M, Libert C, Chen W. Predominant contribution of cis-  
683 regulatory divergence in the evolution of mouse alternative splicing. *Mol Syst Biol*  
684 2015;11:816.
- 685 [35] Hou J, Wang X, McShane E, Zauber H, Sun W, Selbach M, et al. Extensive allele-  
686 specific translational regulation in hybrid mice. *Mol Syst Biol* 2015;11:825.
- 687 [36] Kingma DP, Ba J. Adam: A Method for Stochastic Optimization. arXiv:1412.6980  
688 2014.
- 689 [37] Paszke A, Gross S, Massa F, Lerer A, Bradbury J, Chanan G, et al. PyTorch: An  
690 imperative style, high-performance deep learning library. *Advances in Neural*  
691 *Information Processing Systems* 2019:8024–35.
- 692 [38] Bogard N, Linder J, Rosenberg AB, Seelig G. A Deep Neural Network for  
693 Predicting and Engineering Alternative Polyadenylation. *Cell* 2019;178:91–106.e23.
- 694 [39] Zuberi K, Gandhi S, Bretschneider H, Frey BJ, Deshwar AG. COSSMO:  
695 predicting competitive alternative splice site selection using deep learning.  
696 *Bioinformatics* 2018;34:i429–i37.

697 [40] Pinto PAB, Henriques T, Freitas MO, Martins T, Domingues RG, Wyrzykowska  
698 PS, et al. RNA polymerase II kinetics in polo polyadenylation signal selection. The  
699 EMBO journal 2011;30:2431–44.

700 [41] Gruber AJ, Zavolan M. Alternative cleavage and polyadenylation in health and  
701 disease. Nature Reviews Genetics 2019;20:599–614.

702 [42] Zhang Z, Pan Z, Ying Y, Xie Z, Adhikari S, Phillips J, et al. Deep-learning  
703 augmented RNA-seq analysis of transcript splicing. Nature Methods 2019;16:307–10.

704

705

706

## 707 **Figure legends**

708 **Figure 1 Illustration of the DeeReCT-APA architecture (Using BiLSTM as**  
709 **interaction layer)**

710 **Figure 2 Three designs of Base-Net.**

711 All three of them output a feature vector that represents distilled features of the input  
712 sequence. **A.** Single-Conv-Net uses a single convolution layer for feature extraction. **B.**  
713 Multi-Conv-Net uses multiple convolution layers for feature extraction. **C.** Feature-Net  
714 contains a hand-crafted feature extractor before being processed by fully-connected  
715 layers.

716 **Figure 3 Prediction of gene *Srr***

717 This shows one example of the benefit of modelling all PAS jointly. Each panel shows  
718 the predicted or ground truth usage of each of its four PAS: **A.** PAS of gene *Srr*. **B.**  
719 Ground Truth. **C.** DeeReCT-APA's (Multi-Conv-Net) prediction. **D.** Polyadenylation  
720 Code's prediction. **E.** DeeReCT-APA's (Multi-Conv-Net) prediction of "mixed allele".  
721 The prediction of DeeReCT-APA is much more consistent with ground truth compared  
722 to Polyadenylation Code. Especially for PAS 4, DeeReCT-APA predicts the one of BL  
723 allele to be of lower usage than the one of SP allele which is consistent with ground  
724 truth. Polyadenylation Code, on the contrary, predicts the opposite. In Panel **E**, by  
725 making prediction of the "Mixed Allele", we demonstrated that the increased usage of  
726 PAS in SP allele is probably due to the concerted effects of the other three PAS.

727 **Figure 4 Previous experimental findings and mutation map of gene *Zfp709* and**  
728 ***Lpar2***

729 Mutation map is consistent with previous experimental findings on two genes, *Zfp709*  
730 (**A & C**) and *Lpar2* (**B & D**). Sequencing read coverage graphs (**A & B**) are adapted  
731 from Figure 4H of [31]. The identified PAS are marked by red triangles on top of the  
732 sequencing read coverage (black coverage graph). The sequence variants of the PAS  
733 shaded in pink between BL and SP strains are shown on the top. The BL mutation map  
734 (**C & D**) of the BL distal PAS sequence shows the effect of BL distal sequence mutation  
735 on the usage of distal sites. The SP gene *Zfp709* and *Lpar2* can be viewed as undergoing  
736 a substitution relative to BL. The four heatmap entries above each letter of the sequence  
737 (**C & D**, bottom) show the relative change of usage level when the nucleotide at that  
738 position is substituted with the nucleotide of the corresponding row. Darker red  
739 indicates greater increase in usage and darker blue indicates more decrease in usage.  
740 The entries that correspond to the genetic variants between BL and SP in **A & B** are  
741 marked by red squares.

742 **Figure 5 Previous experimental findings and DeeReCT-APA's prediction of gene**  
743 ***Alg10b***

744 *In silico* prediction for the *Alg10b* PAS reporter is consistent with previous  
745 experimental findings. Similar to Figure 4A, the sequencing read coverage graph and  
746 the sequence variants are shown in **A**. The red triangles mark the identified PAS sites.  
747 The structures of PAS reporter constructs are shown in **B**, where “BL” is the original  
748 BL version of the most distal PAS, “SP” is the original SP version, “BL2SP” is the BL  
749 sequence only inserted with TTTT at the corresponding location and “SP2BL” is the  
750 SP sequence only deleted with TTTT at the corresponding location. The experimental  
751 results from PAS reporter assay for the four reporters are shown in **C**. and their *in silico*  
752 predictions are shown in **D**. Considering the *in silico* prediction pairs, BL & BL2SP  
753 and SP & SP2BL, it is clear that DeeReCT-APA is able to identify the negative  
754 modulation of PAS usage by the poly(U) tract. Figure (**A**, **B** & **C**) are adapted from  
755 Figure 4H of [31]. See text for more details.  
756

757 **Figure 6 Comparison of the allelic usage difference predicted by DeeReCT-APA**  
758 **and Polyadenylation Code**

759 F1 model fine-tuned from BL parental model is used. **A. B.** The horizontal axis is the  
760 ground truth allelic usage difference (BL usage minus the SP usage). The vertical axis  
761 shows the predicted allelic usage difference. The red line shows the perfect prediction.  
762 In terms of Person correlation, DeeReCT-APA shows better correlation than  
763 Polyadenylation Code. **C.** Pearson correlations (and their p-values) between two  
764 quantities at different minimum allelic usage difference are shown in the table below.  
765 The prediction of DeeReCT-APA still has better correlation than Polyadenylation Code  
766 when the dataset is filtered at different thresholds.

767

768 **Figure 7 Visualization of learned convolutional filters in DeeReCT-APA**

769 Some visualization examples of the learned convolutional filters of DeeReCT-APA. **A.**  
770 **B.** The most common polyadenylation motifs AUUAAA and AAUAAA are learned in  
771 layer 1 convolutional filter #2 and #37, respectively. **C.** Visualization of a layer 2 filter,  
772 #38 shows a mouse specific polyadenylation motif UUUAAA. **D.** Layer 2 filter #19  
773 shows the Poly-U islands on polyadenylation. Note that the layer 2 filter visualization  
774 PFMs are wider than the layer 2 filter (12nt) because the receptive field of neurons in a  
775 deeper layer is in general greater than their corresponding filter width.

776

777 **Tables**

778 **Table 1 Performance summary for the BL parental model and the F1 model.**

779

780 **Table 2 The performance of DeeReCT-APA using different interaction layers**

781

782 **Supplementary material**

783 **Supplementary File**

784 DeeReCT-APA-Supplementary-File.pdf

785 **Figure S1 The structures of DeeReCT-APA models used in the ablation study.**

786 **A.** The structure of DeeReCT-APA with interaction layers but without BiLSTM. **B.**  
787 The structure of DeeReCT-APA with interaction layers removed. Comparing **A** with  
788 Figure 1 in the main text, it has BiLSTM removed and only has the affine layer in the  
789 interaction layers. In **B**, the interaction layers are removed altogether and DeeReCT-  
790 APA resorted to comparison-based training (to predict which one of the two PAS is of  
791 higher usage). Note that an additional affine layer is added on top of the Base Networks  
792 to cast the output of the base network (which is a vector) into a scalar.

793 **Figure S2 Comparison of the allelic usage difference prediction of DeeReCT-**  
794 **APA and Polyadenylation Code.**

795 F1 model fine-tuned from SP parental model is used. **A. B.** The horizontal axis is  
796 the ground truth allelic usage value difference between two homologous PAS (which  
797 is the BL usage value minus the SP usage value). The vertical axis shows the predicted  
798 allelic usage value difference. The scatter plot of DeeReCT-APA is shown in Panel **A**  
799 and Polyadenylation Code is shown in Panel **B**. As DeeReCT-APA predicts the usage  
800 value in percentage, we draw a red line that shows the perfect prediction. **C.** Pearson  
801 correlations between two quantities at different minimum allelic usage difference are  
802 shown in the table below.

803 **Figure S3 Visualization of convolutional filters in layer 1 of DeeReCT-APA.**

804 There are 40 convolutional filters in layer 1 of DeeReCT-APA. The model is trained  
805 on parental BL dataset and fine-tuned on F1.

806 **Figure S4 Visualization of convolutional filters in layer 2 of DeeReCT-APA.**

807 There are 40 convolutional filters in layer 2 of DeeReCT-APA. The model is trained  
808 on parental BL dataset and fine-tuned on F1.

809 **Table S1 List of features used in Feature-Net and their corresponding**  
810 **dimensions.**

811 **Table S2 List of hyperparameters for the three DeeReCT-APA models.**

812 **Table S3 Performance summary for the BL parental model and the F1 model**  
813 **fine-tuned from the BL parental model.**

814 **Table S4 Performance summary for the SP parental model and the F1 model**  
815 **fine-tuned from the SP parental model.**

816 **Table S5 Replicated Experiments of 5-fold cross validation on 5 random splits.**

817 **Table S6 Comparison accuracy on dataset from [20]**

818 **Table S7 Replicated Experiments of ablation study.**

819



# Predicted Usage Level

0.1  
0.2  
0.2  
...  
0.1  
0.2

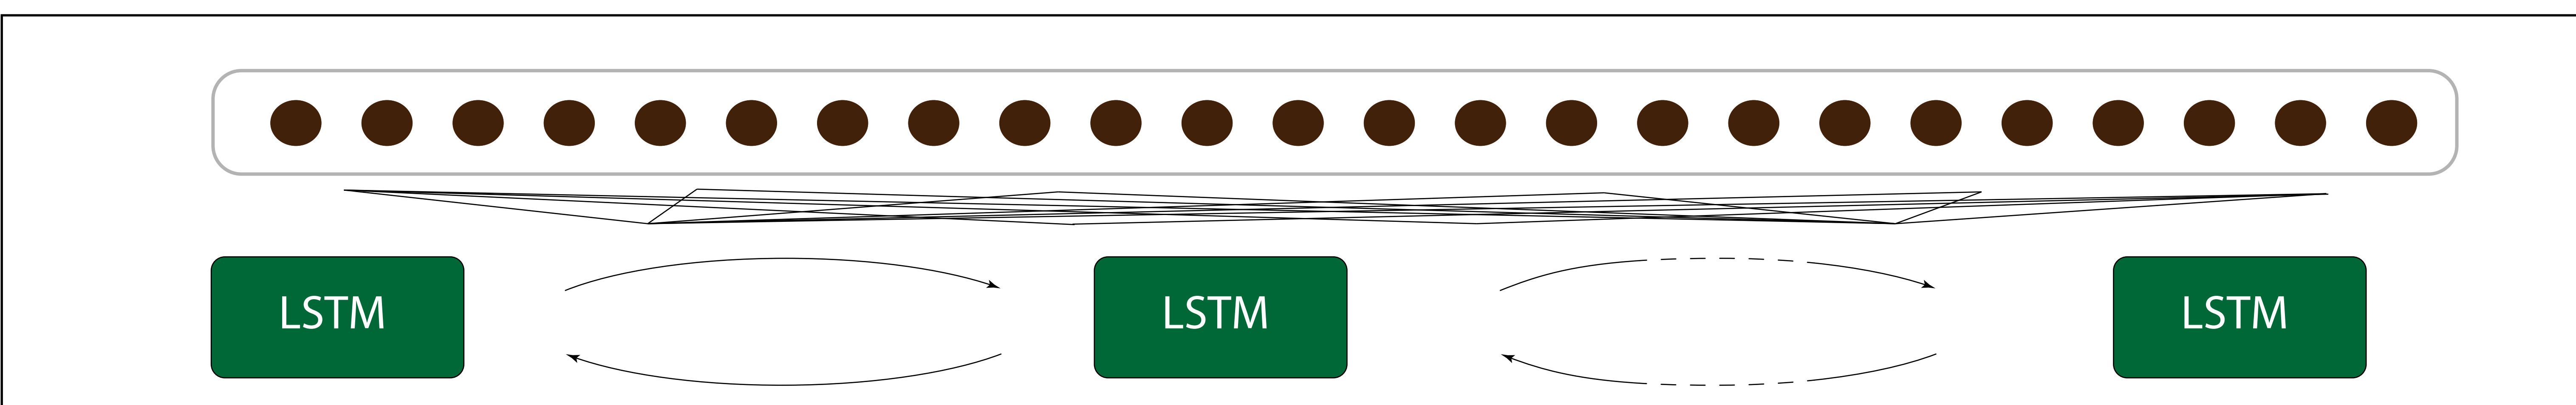

Interaction Layers

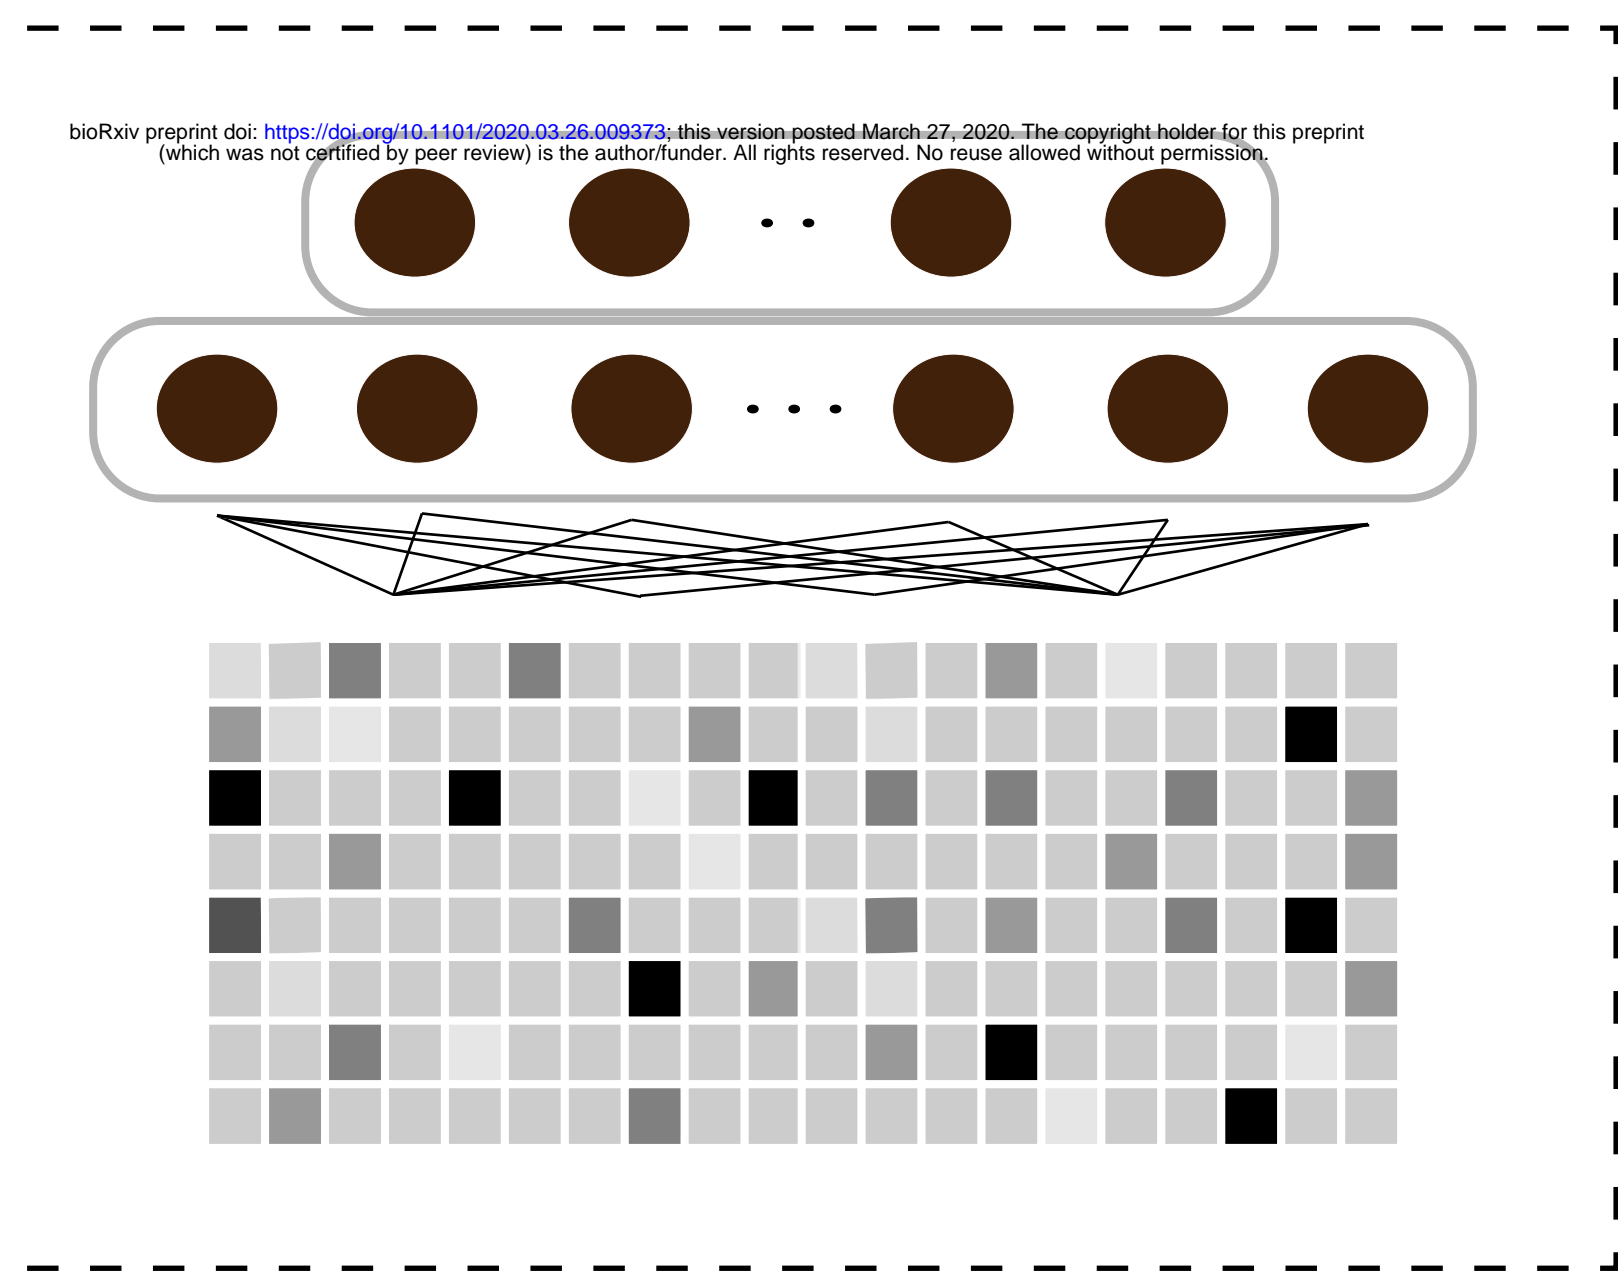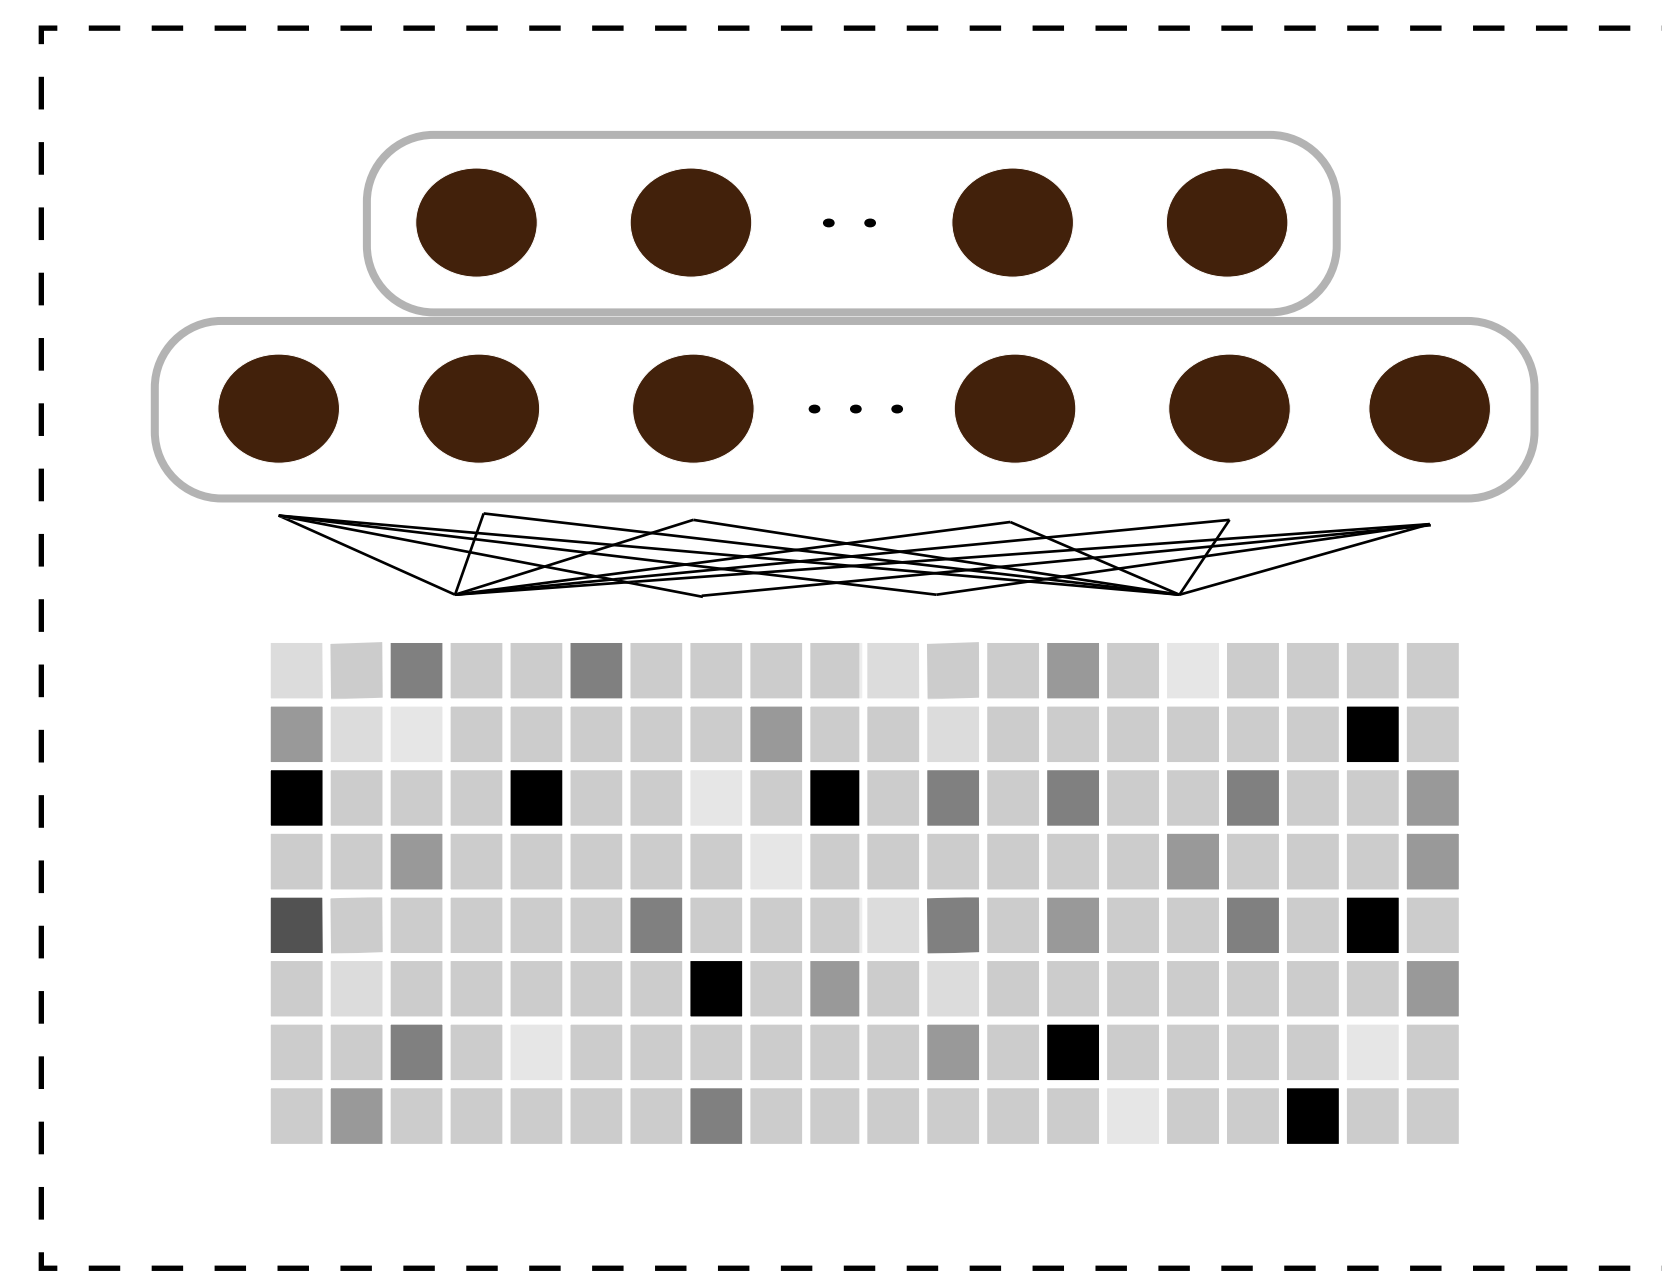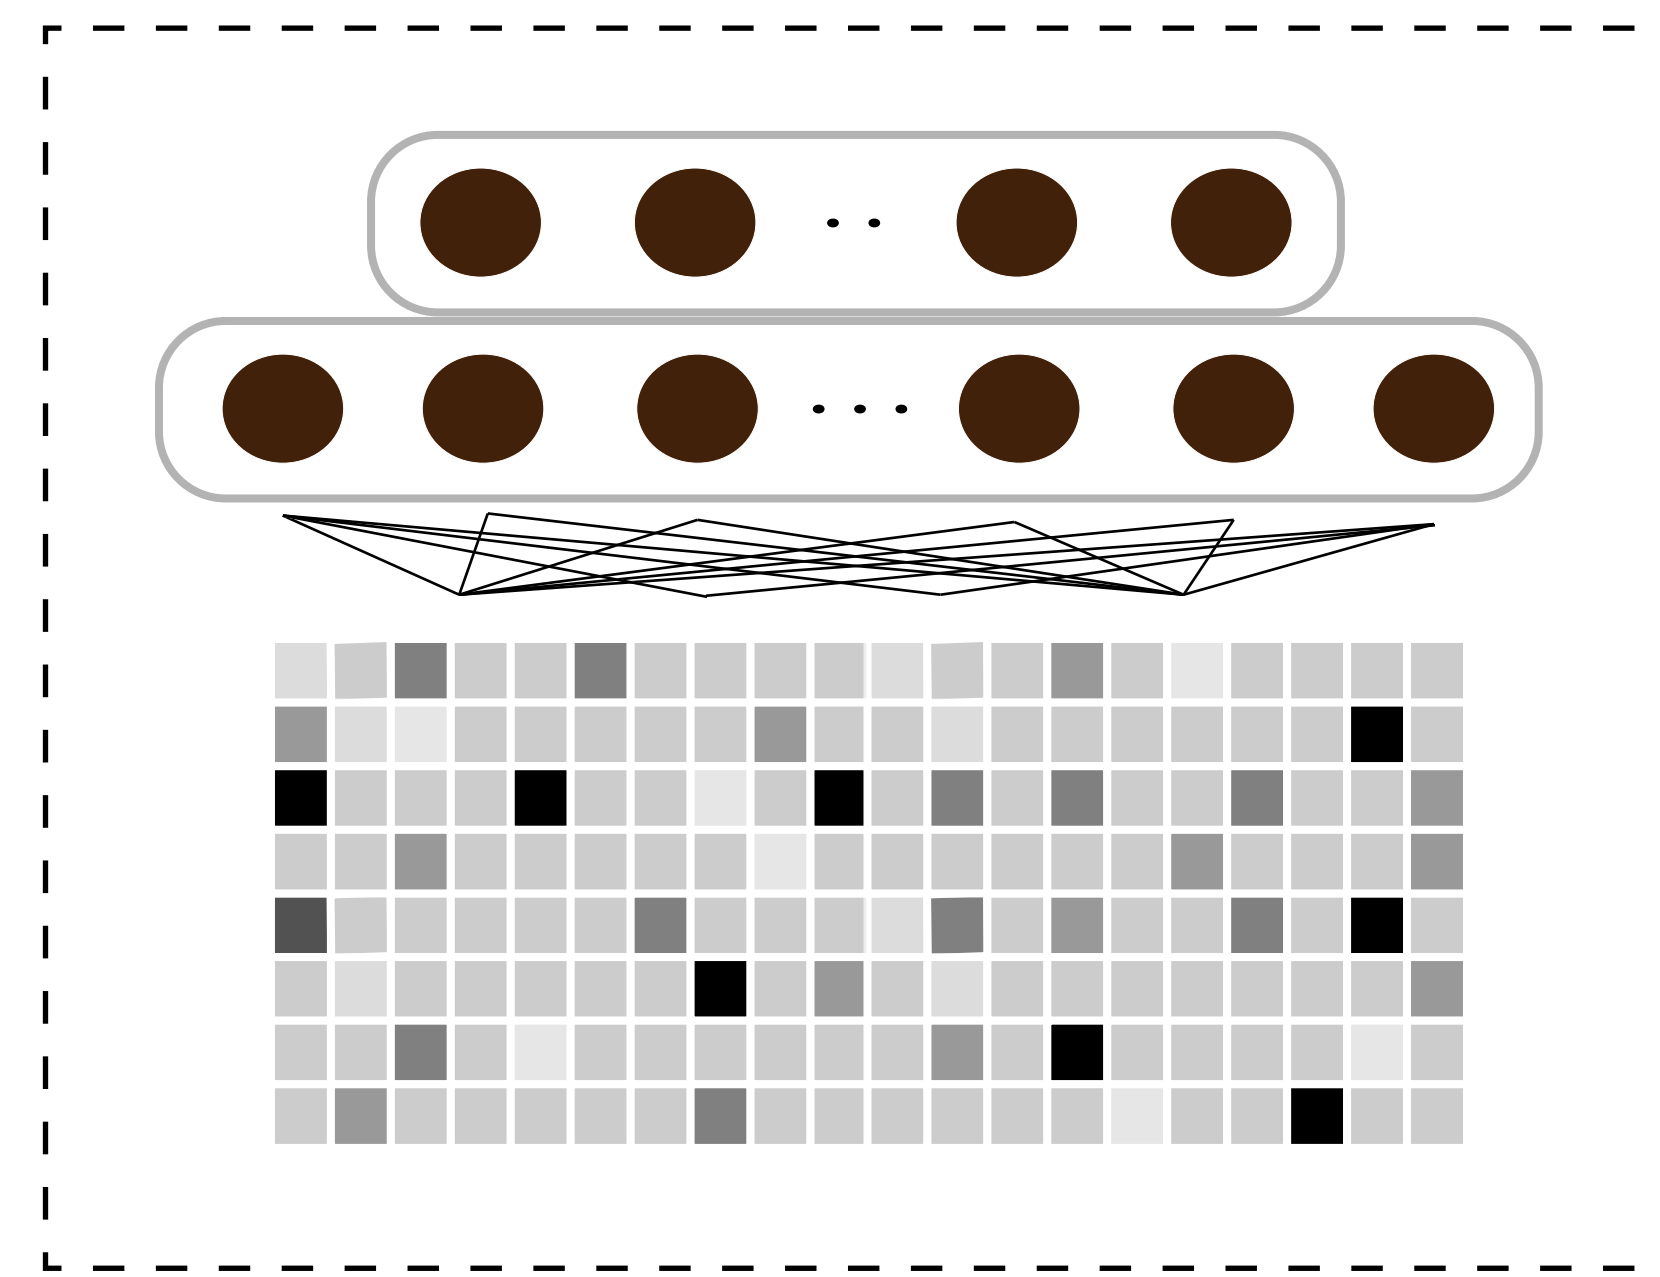

Base Networks

TGGGATACAACCTCT

ATACTACACATAACA

GGGCATTACCAGAA

Polyadenylation Sites

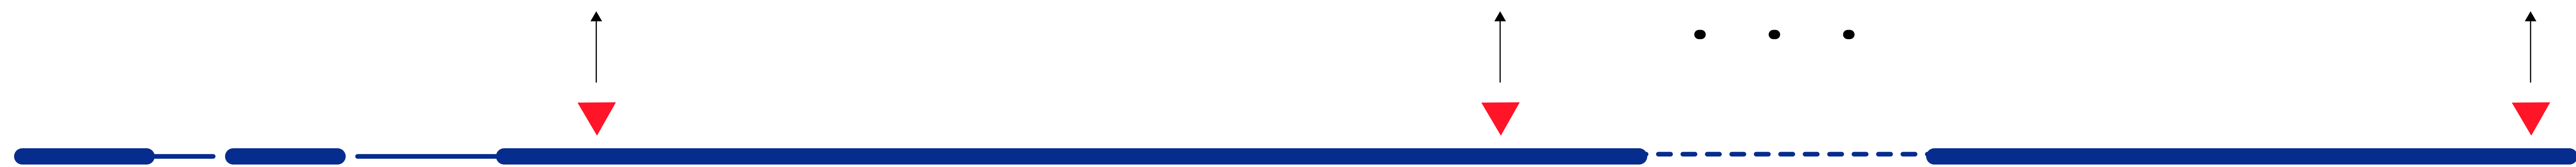



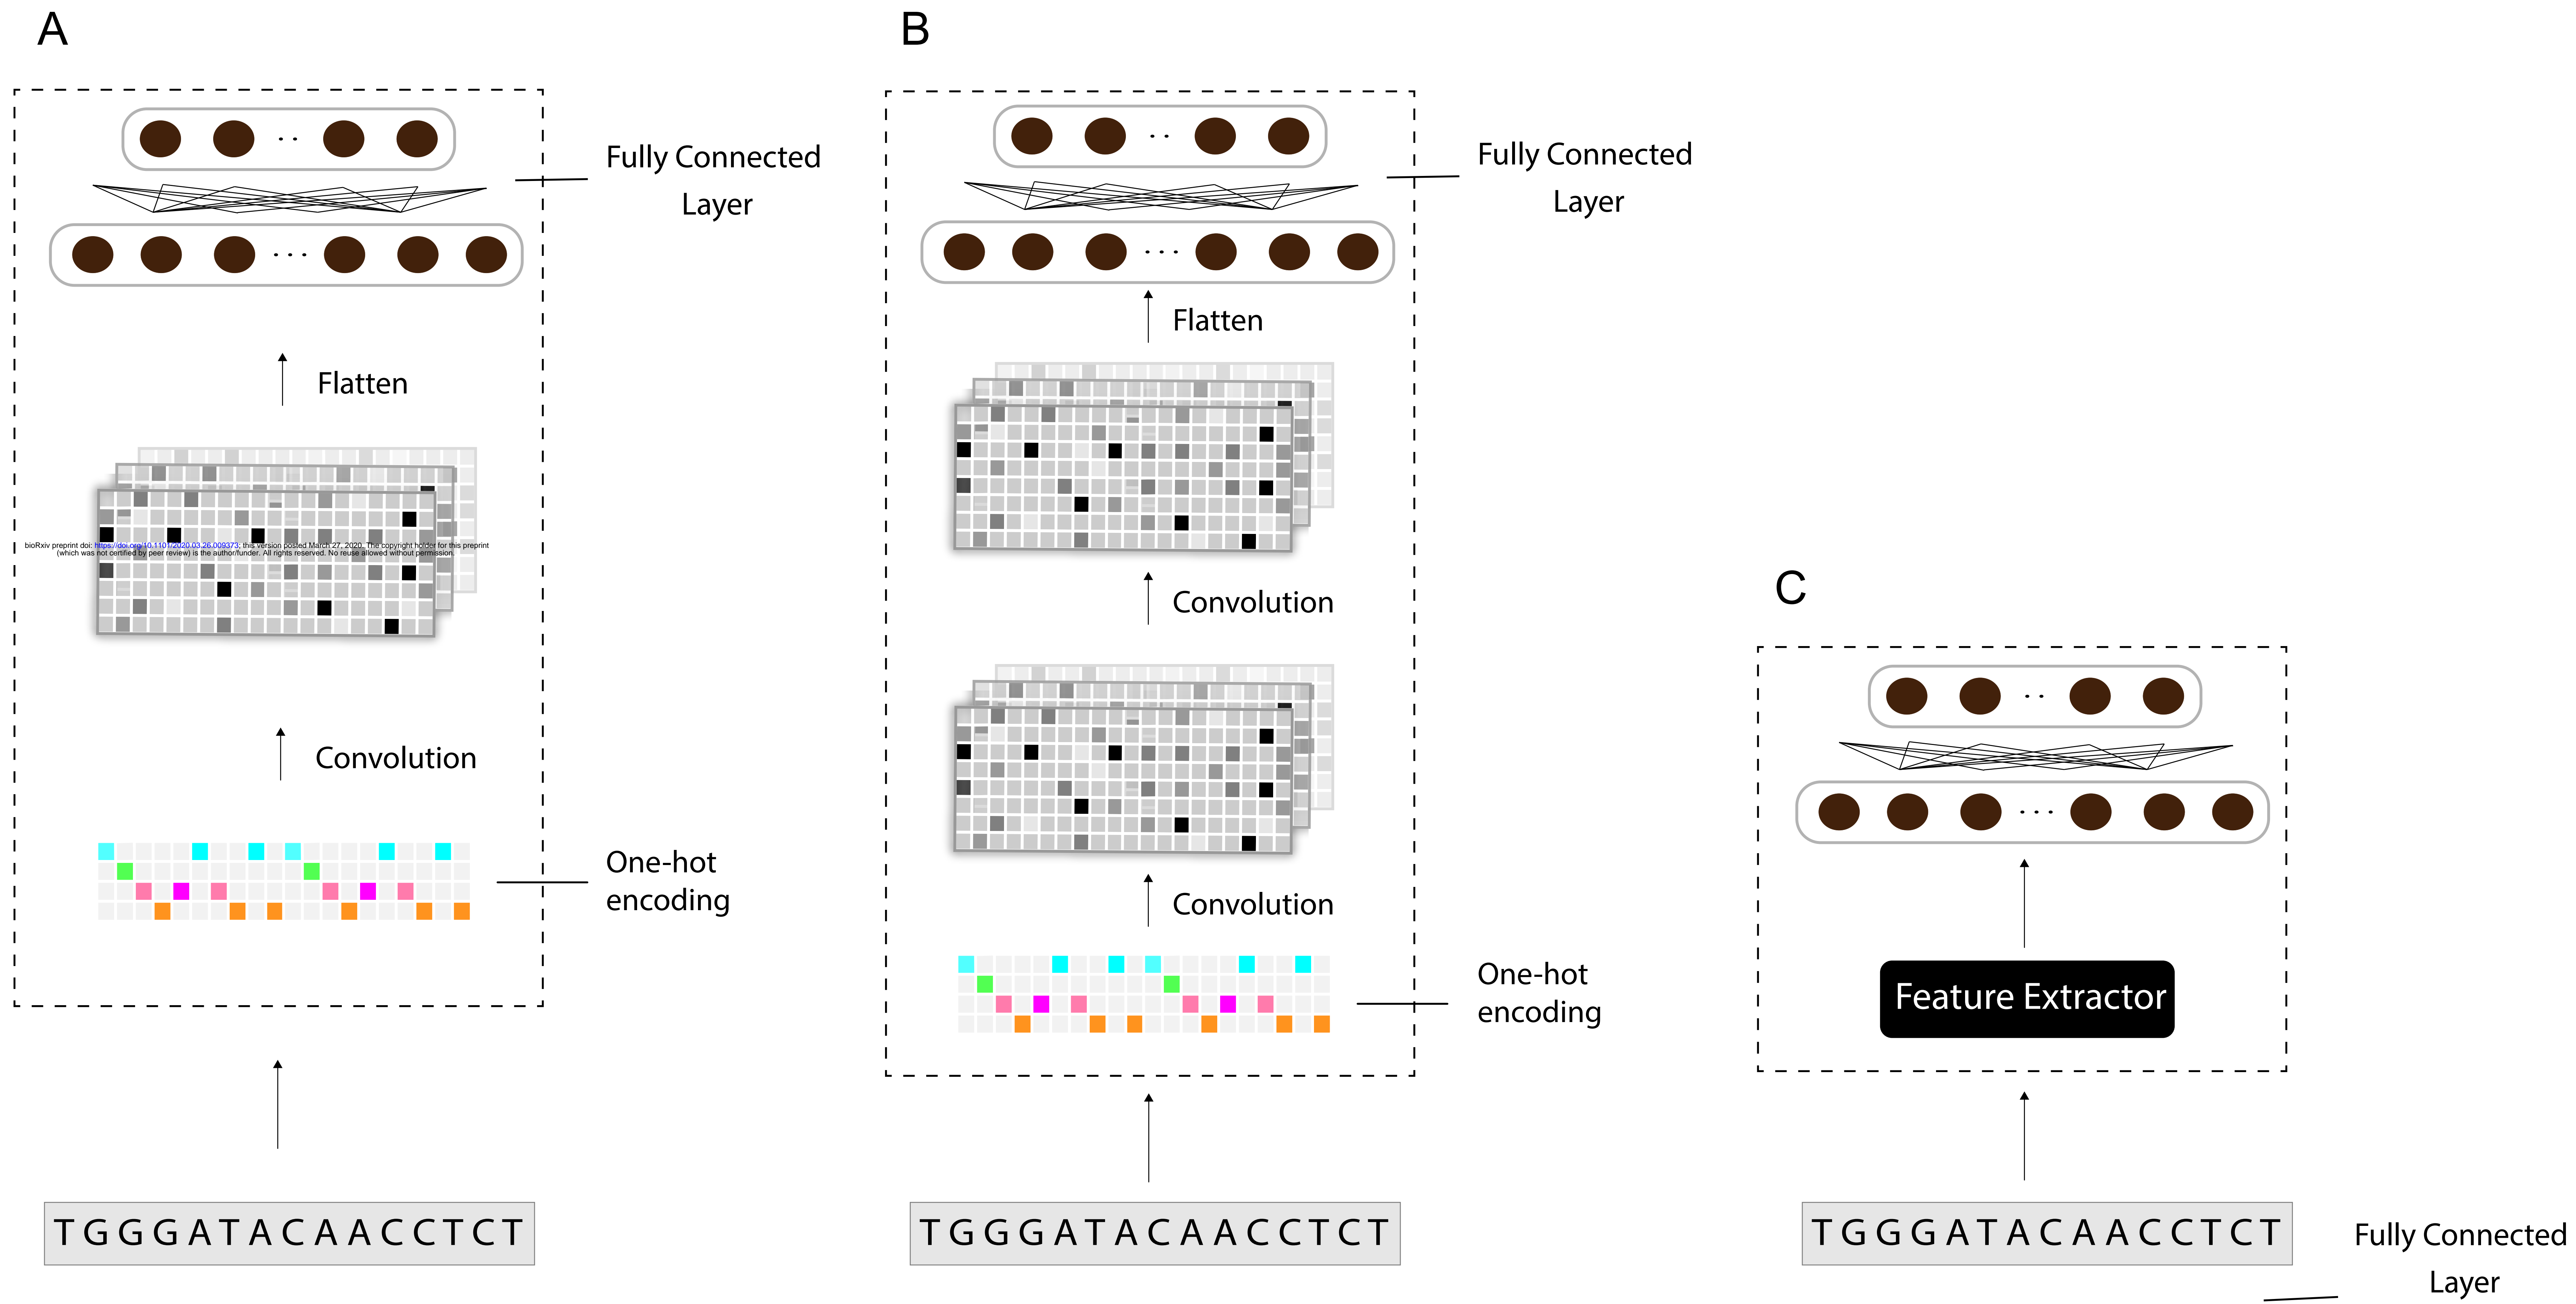

bioRxiv preprint doi: <https://doi.org/10.1101/2020.03.26.009373>; this version posted March 27, 2020. The copyright holder for this preprint (which was not certified by peer review) is the author/funder. All rights reserved. No reuse allowed without permission.

A

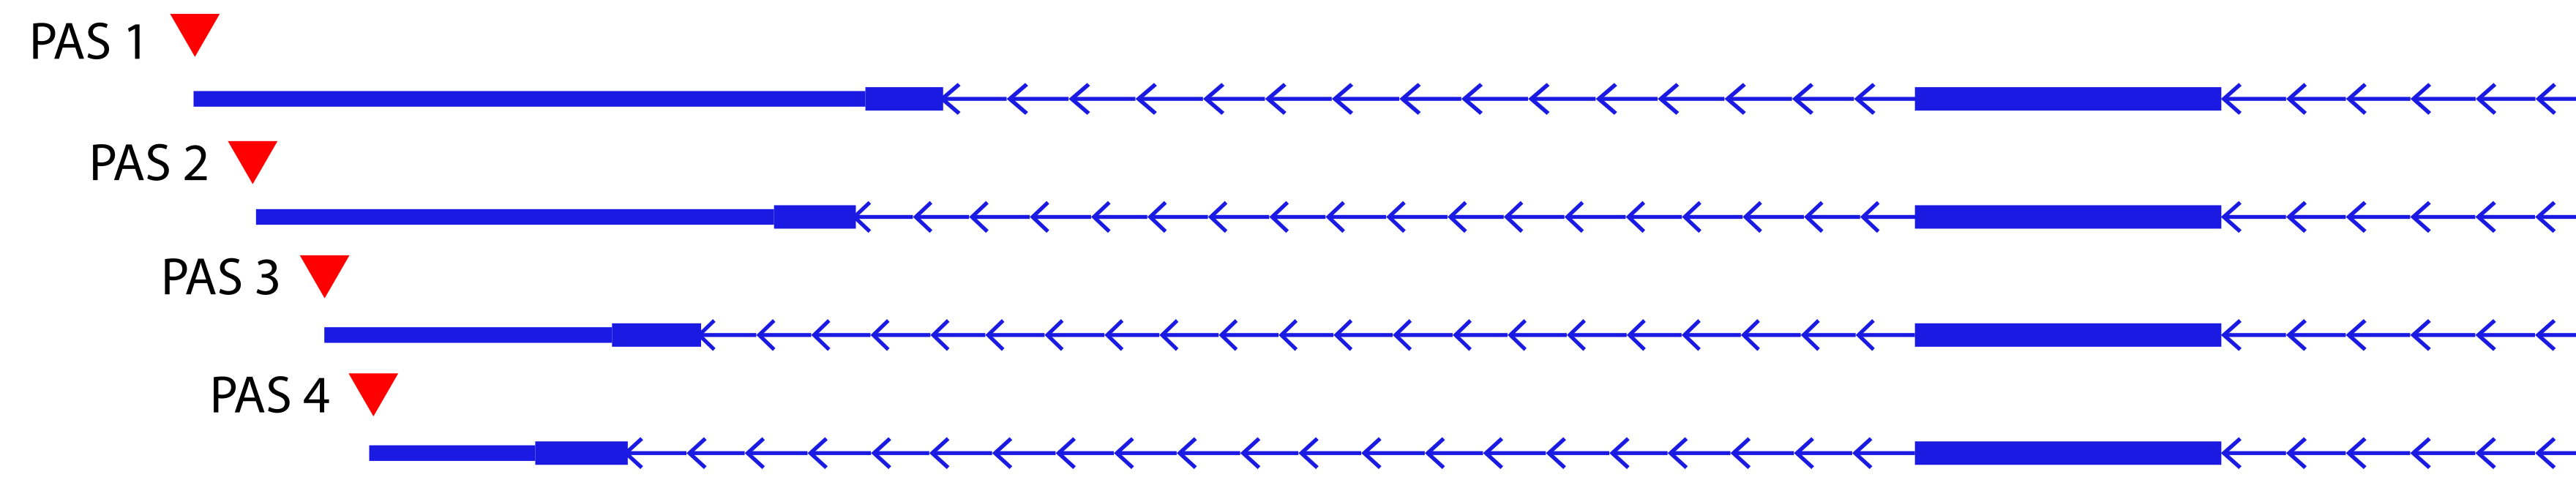

B

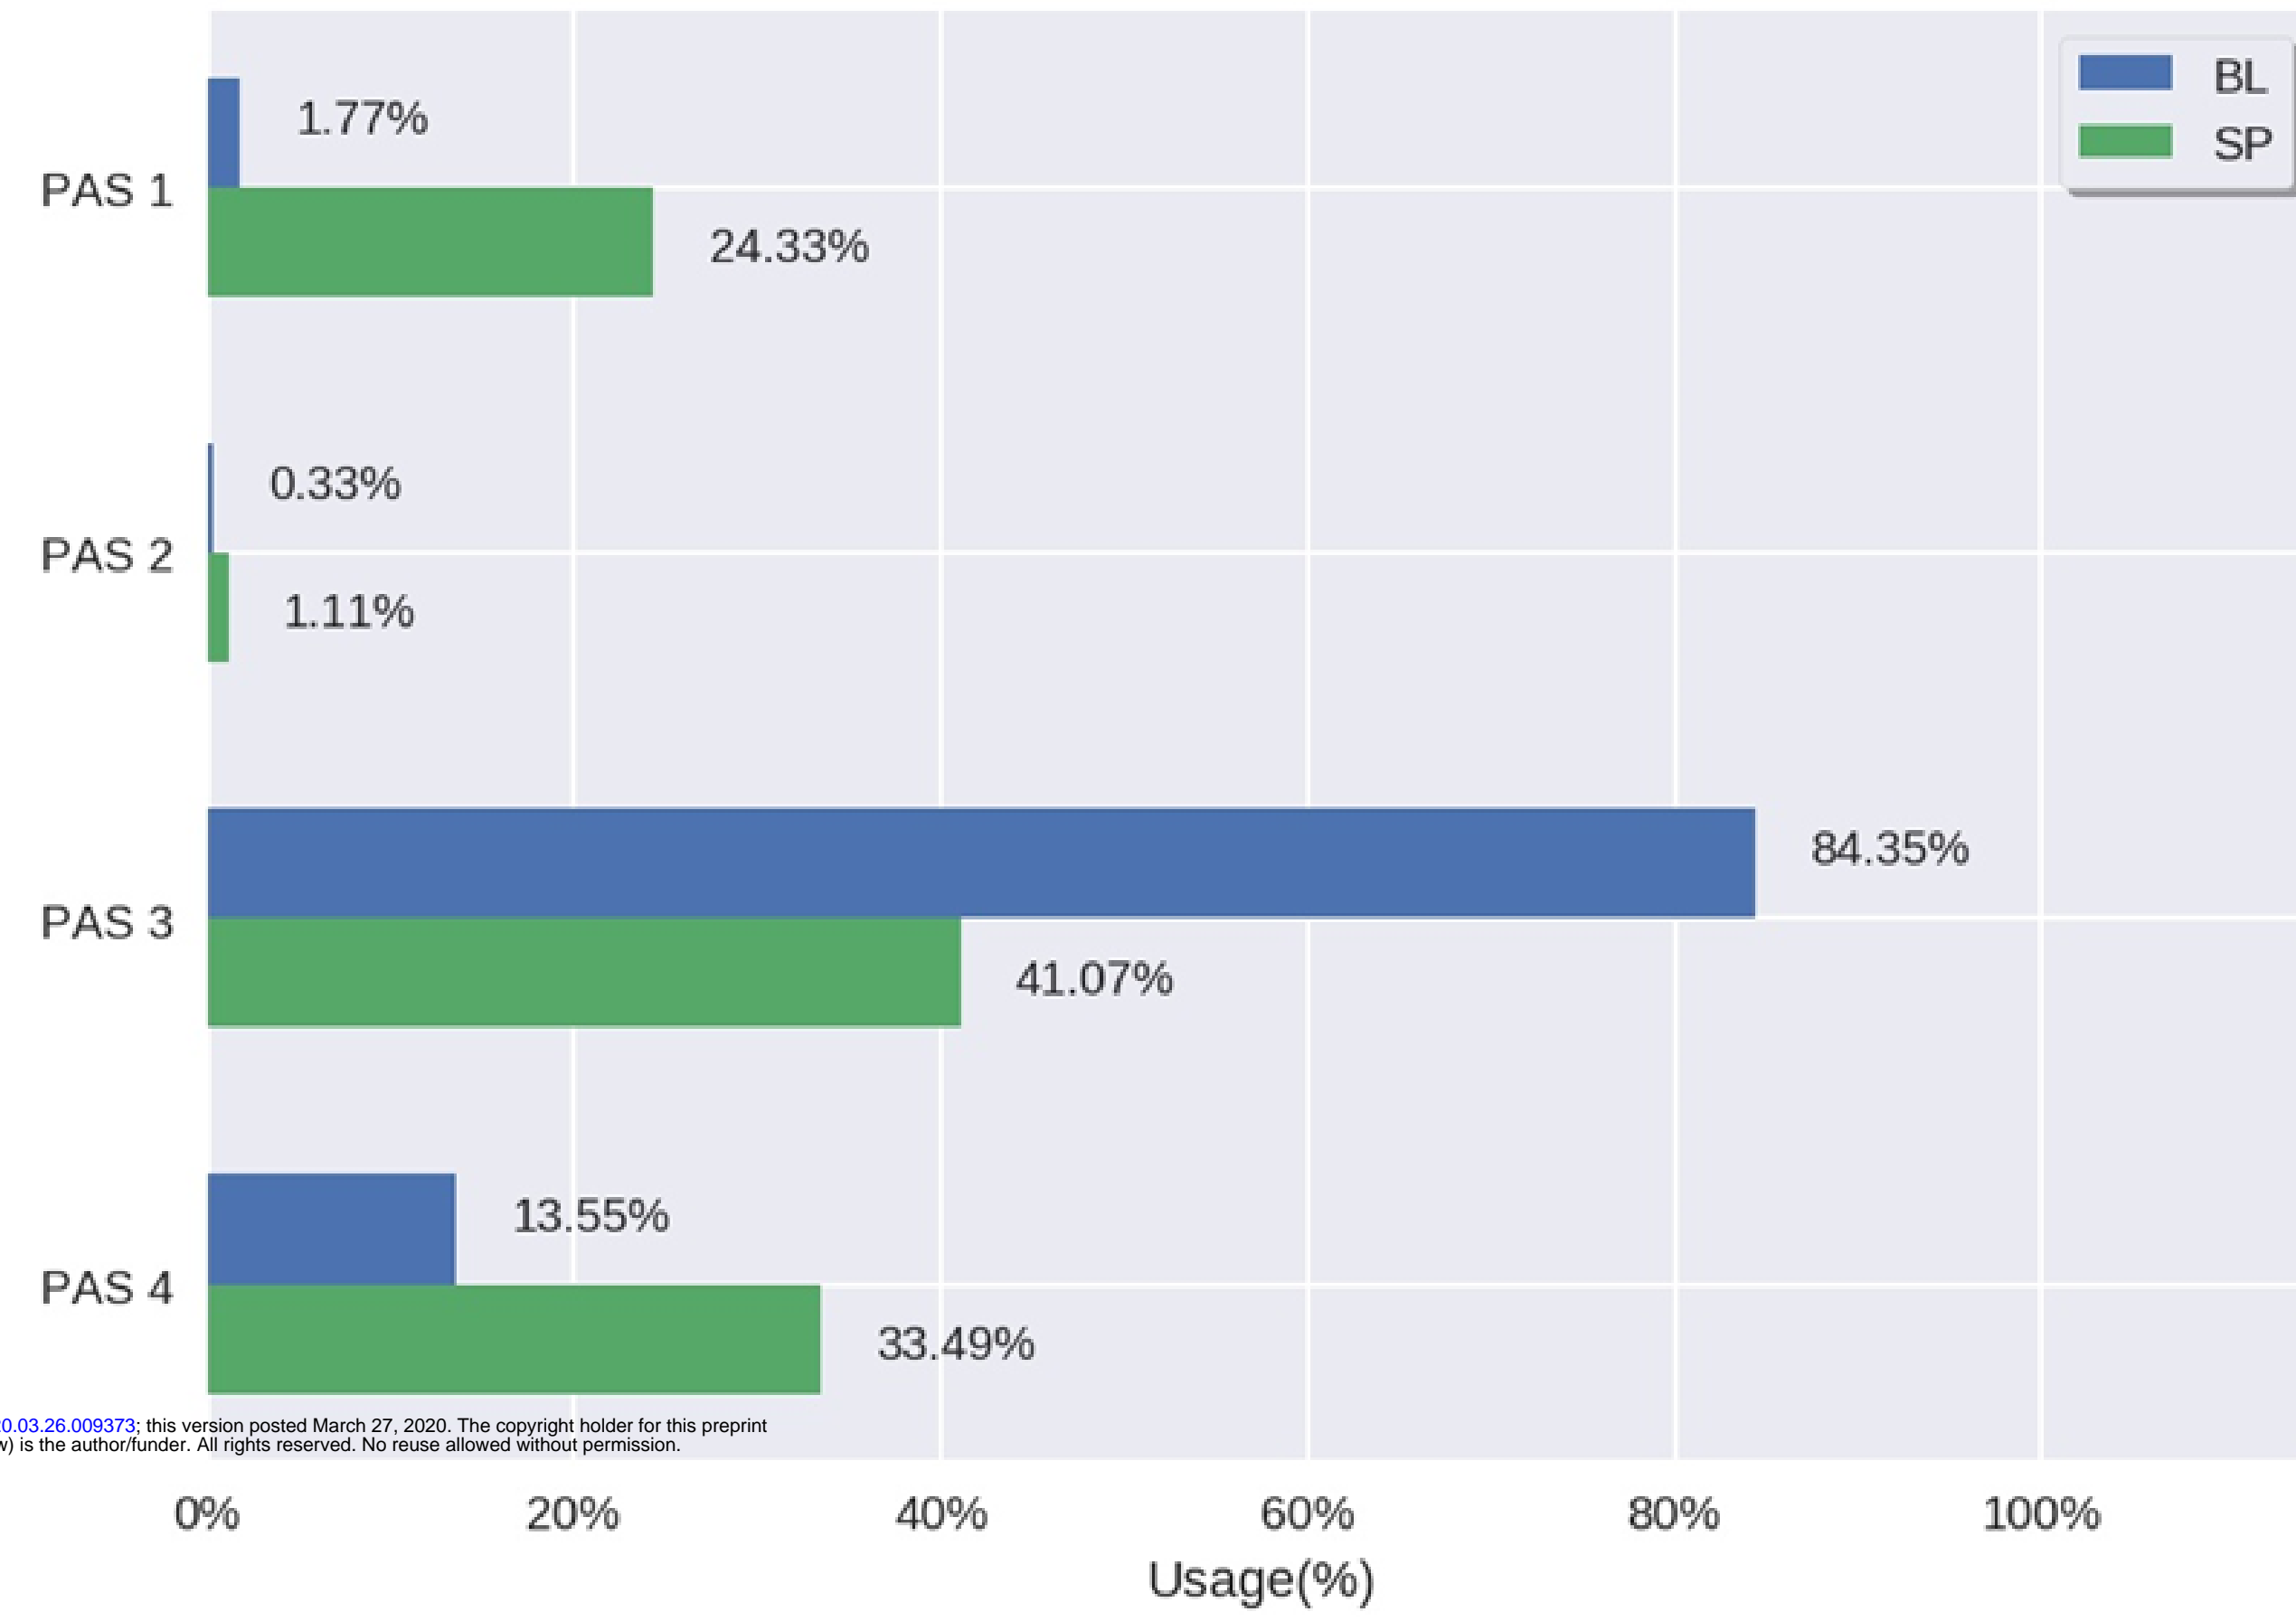

C

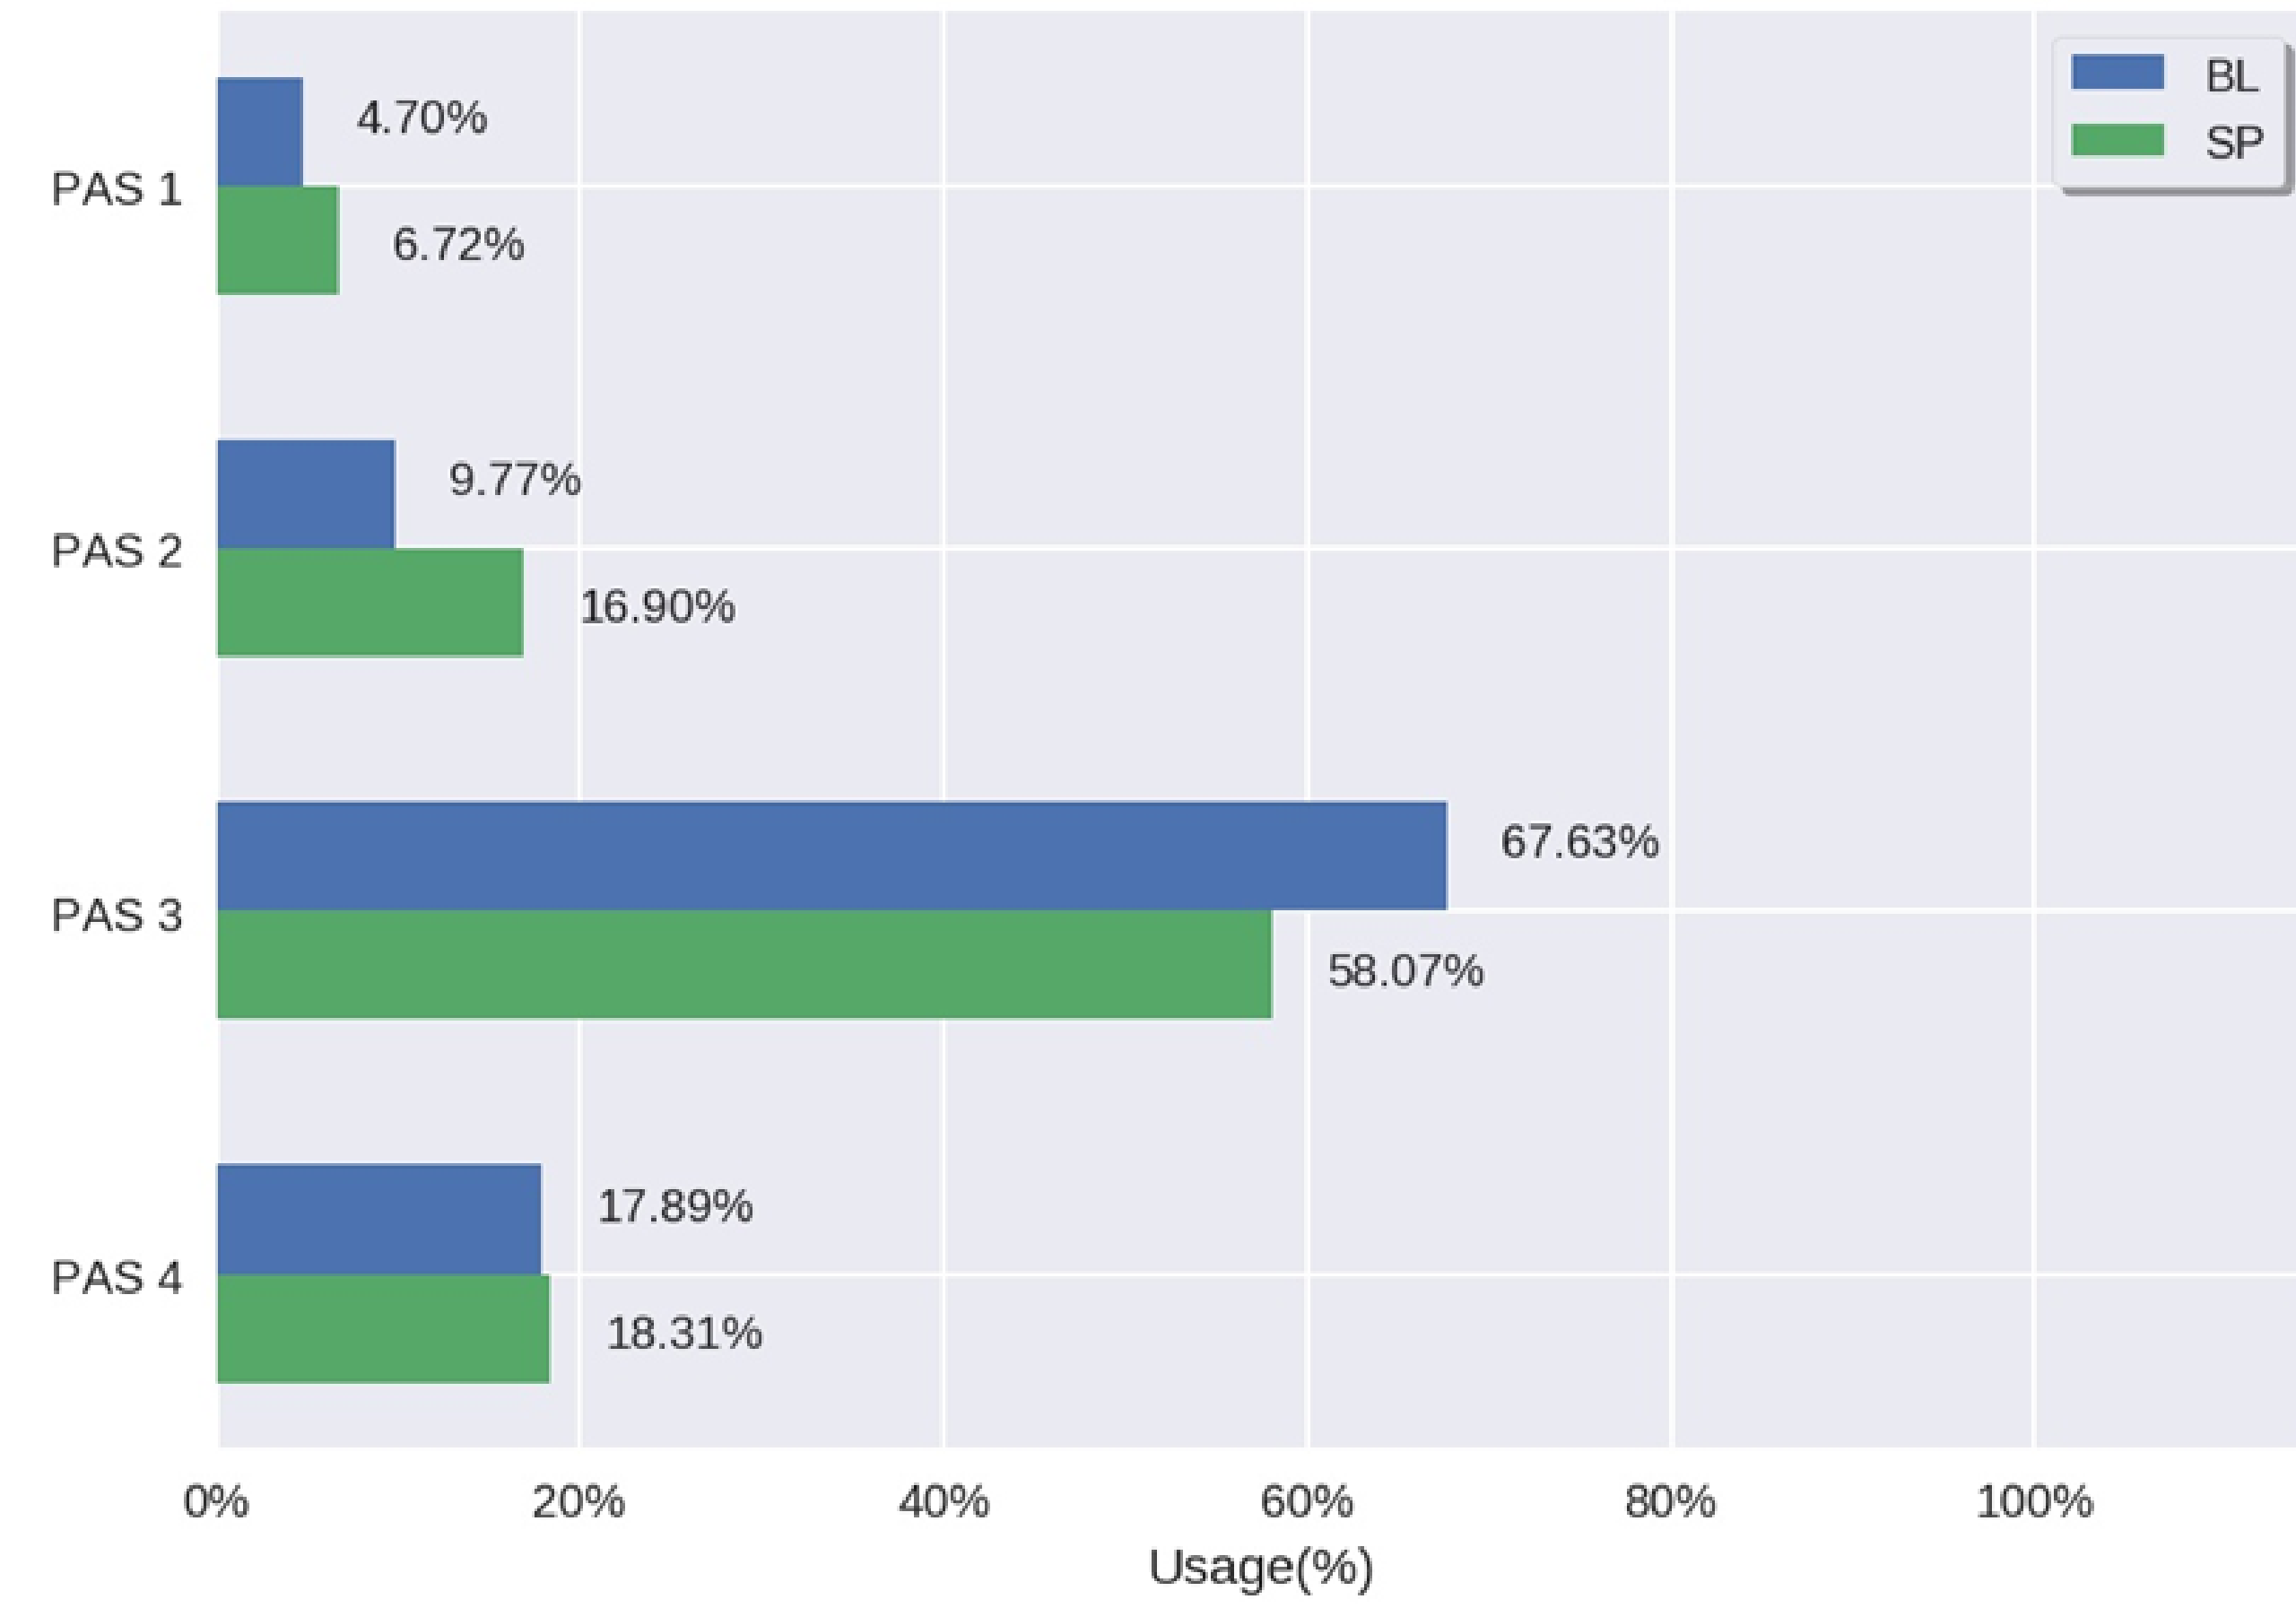

bioRxiv preprint doi: <https://doi.org/10.1101/2020.03.25.009373>; this version posted March 27, 2020. The copyright holder for this preprint (which was not certified by peer review) is the author/funder. All rights reserved. No reuse allowed without permission.

D

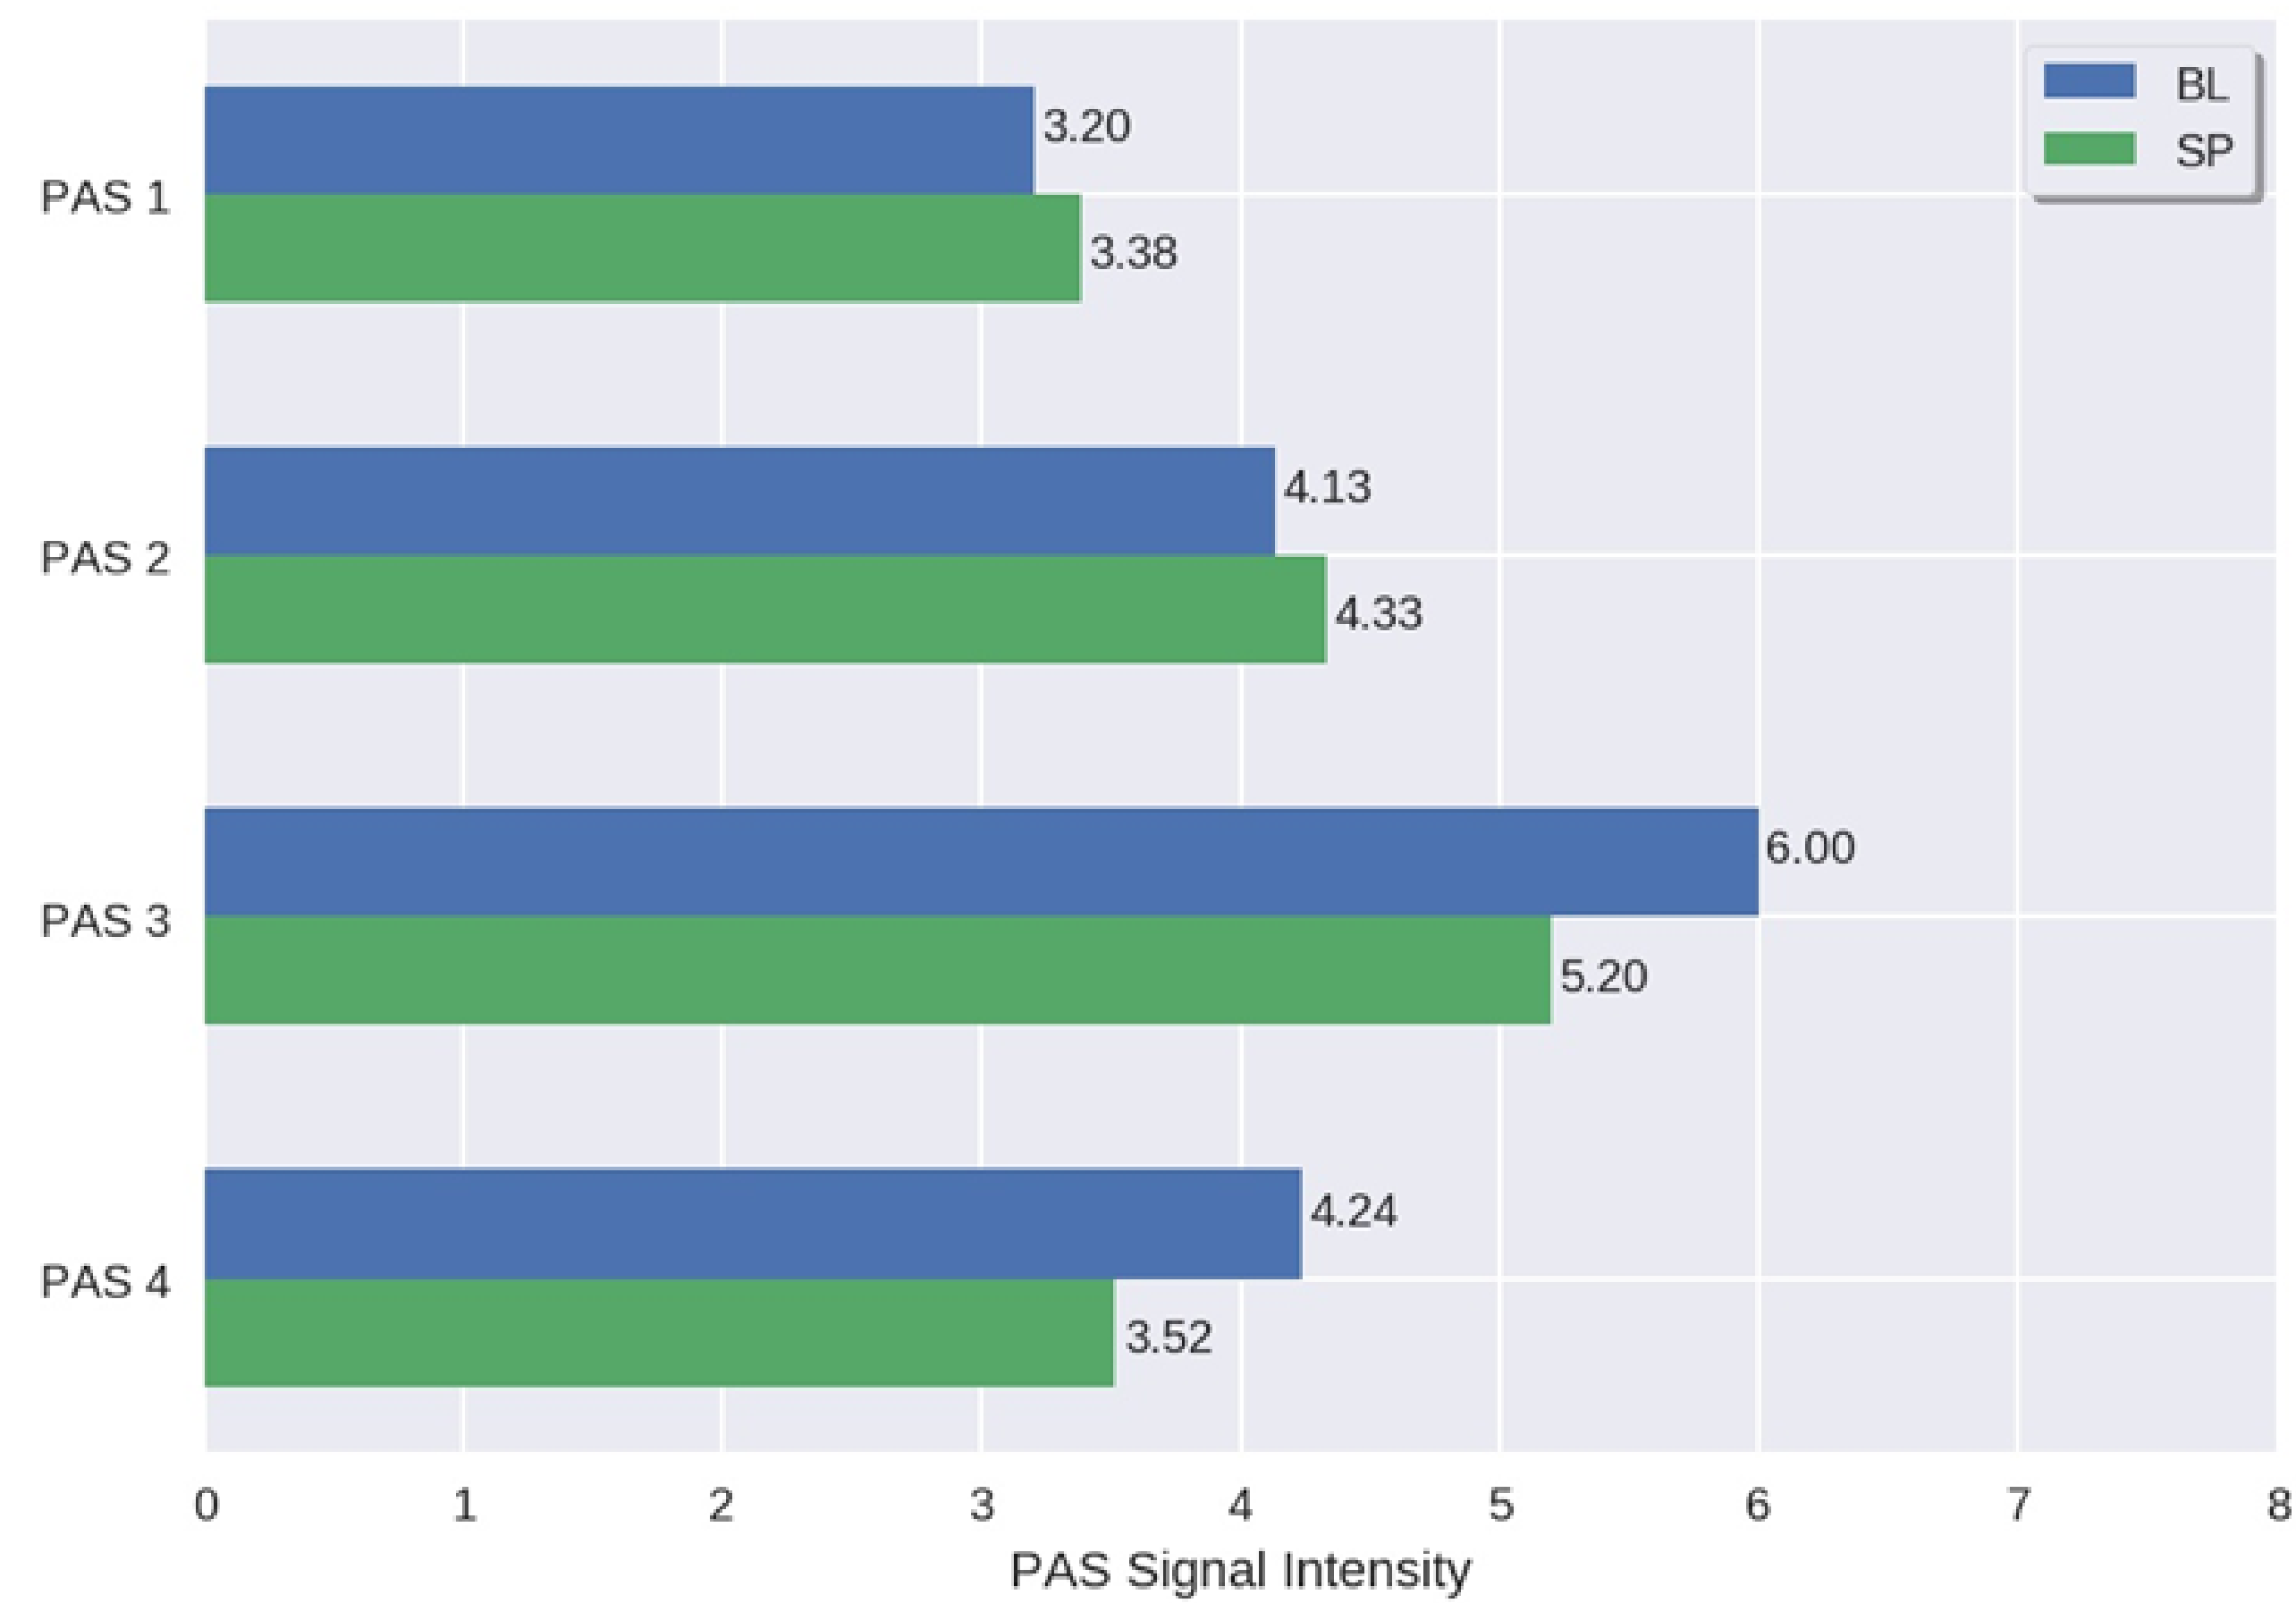

E

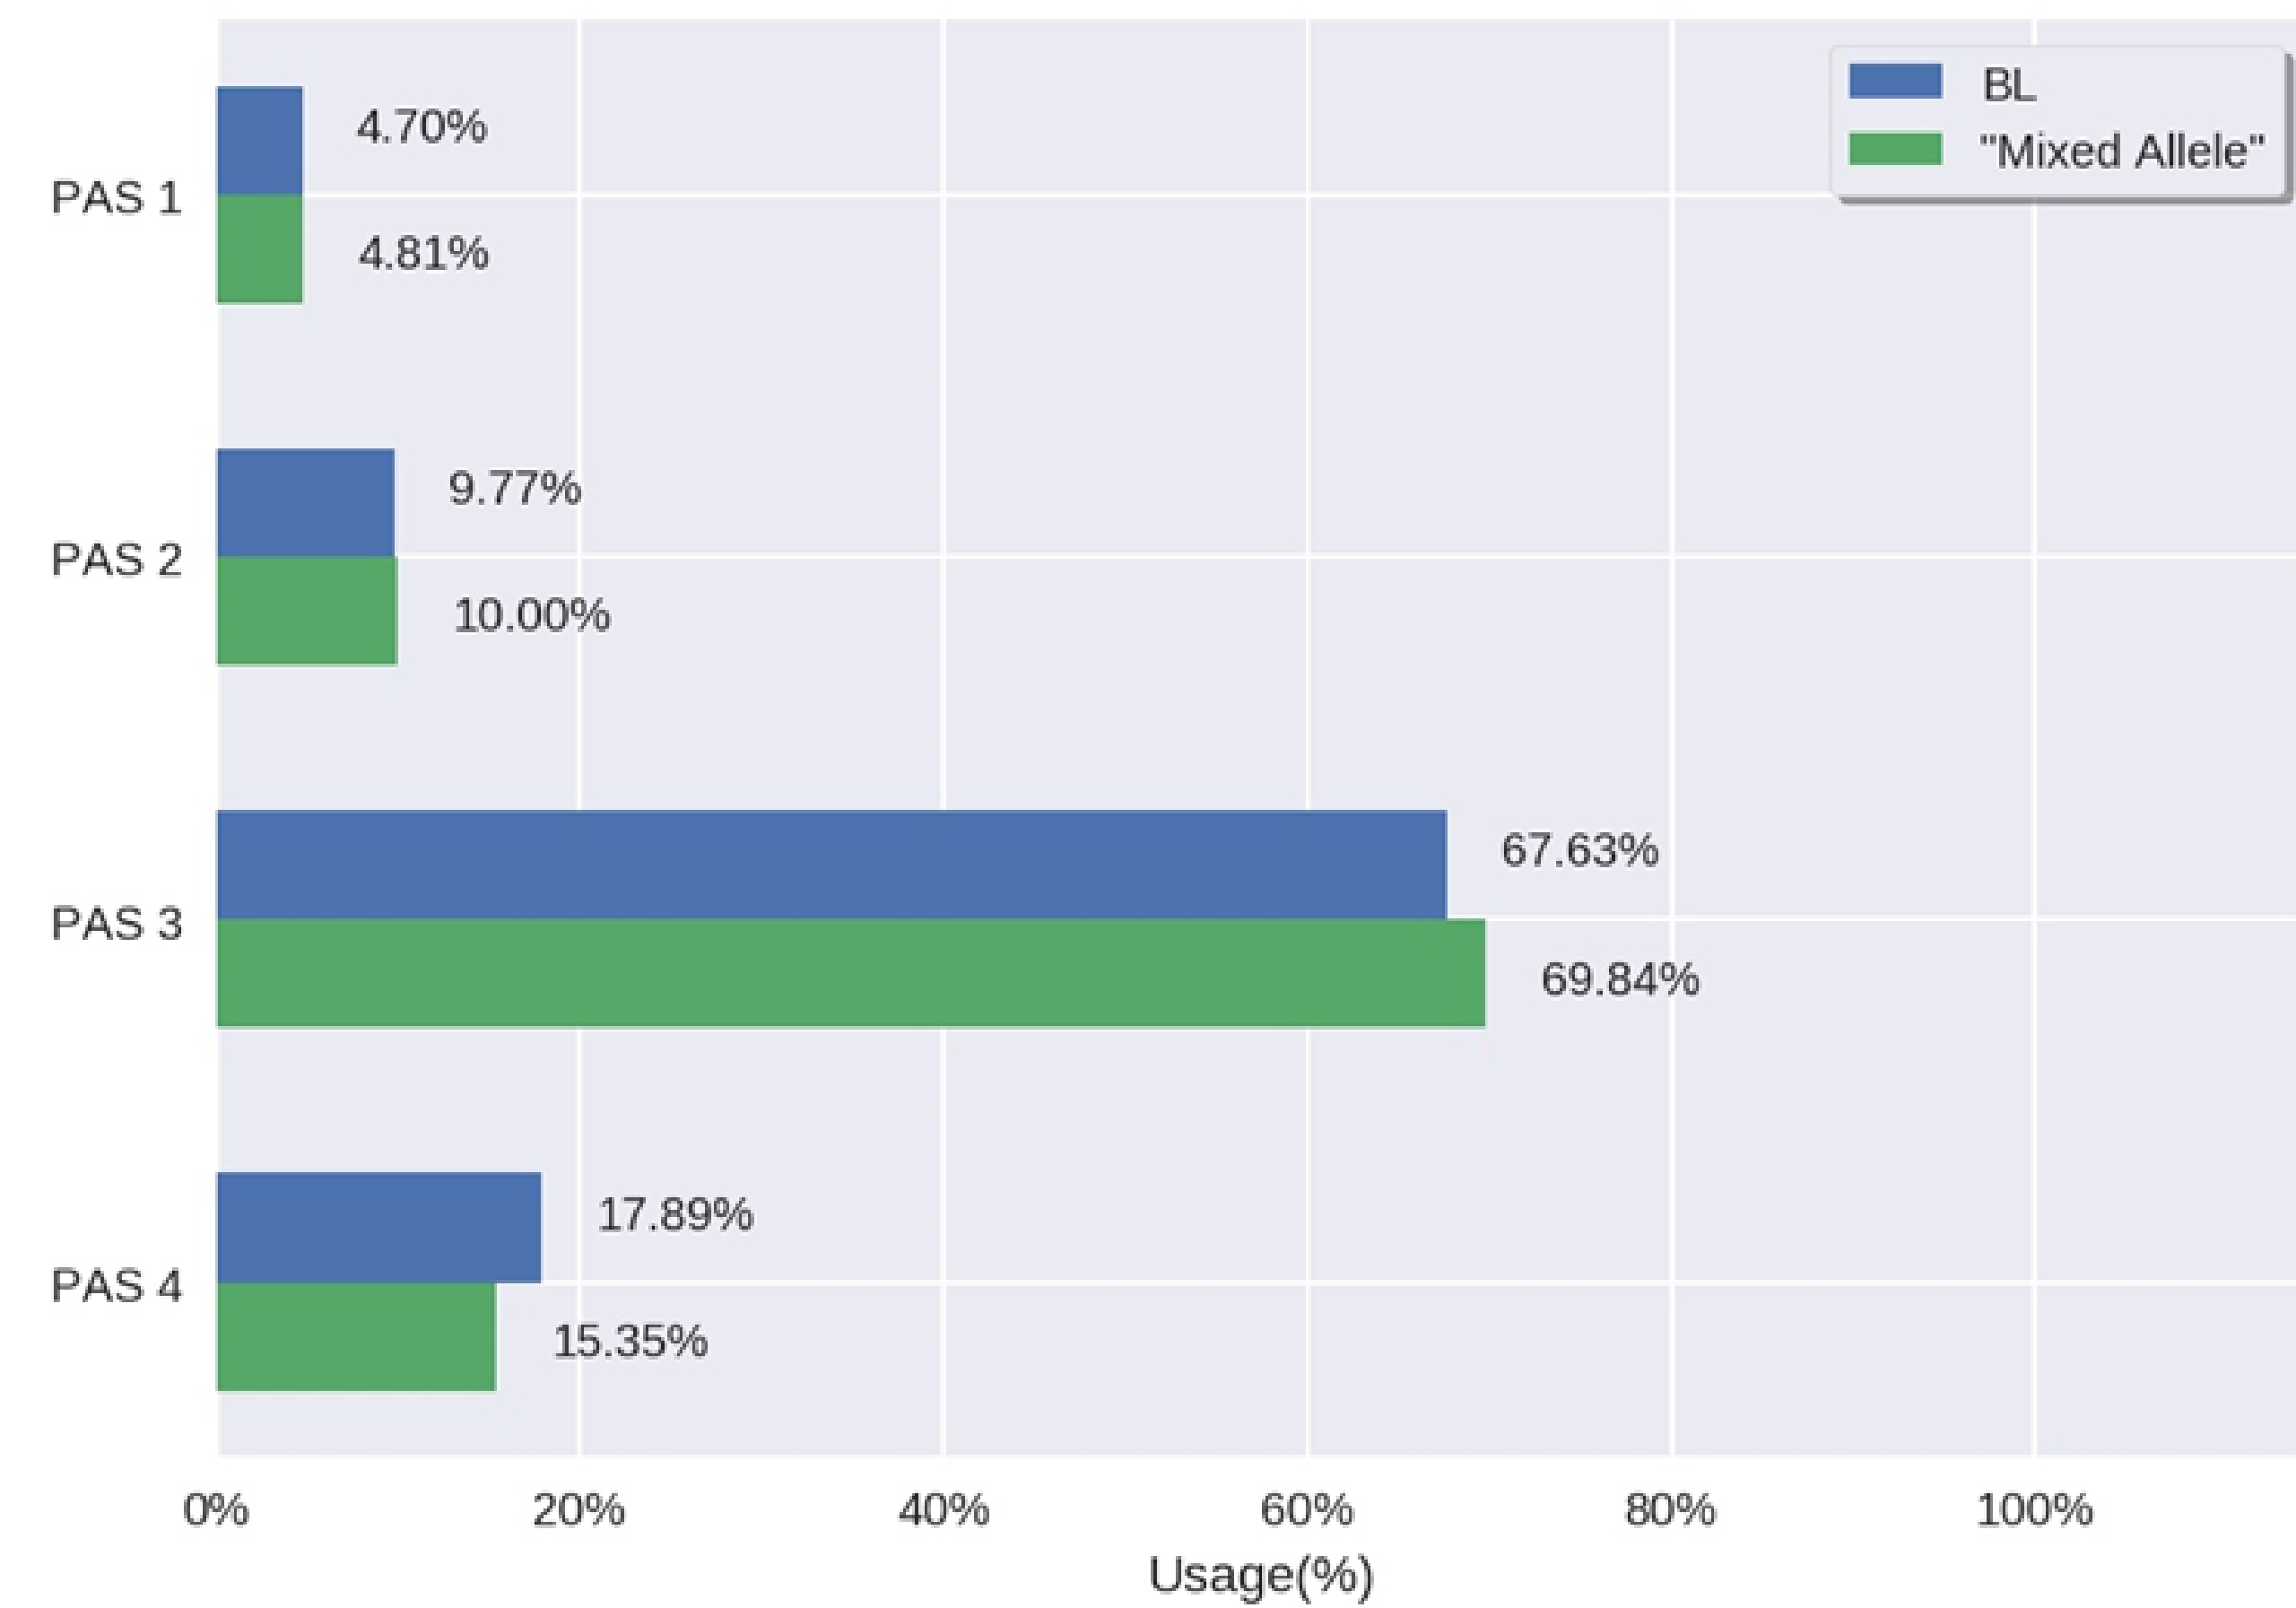

A

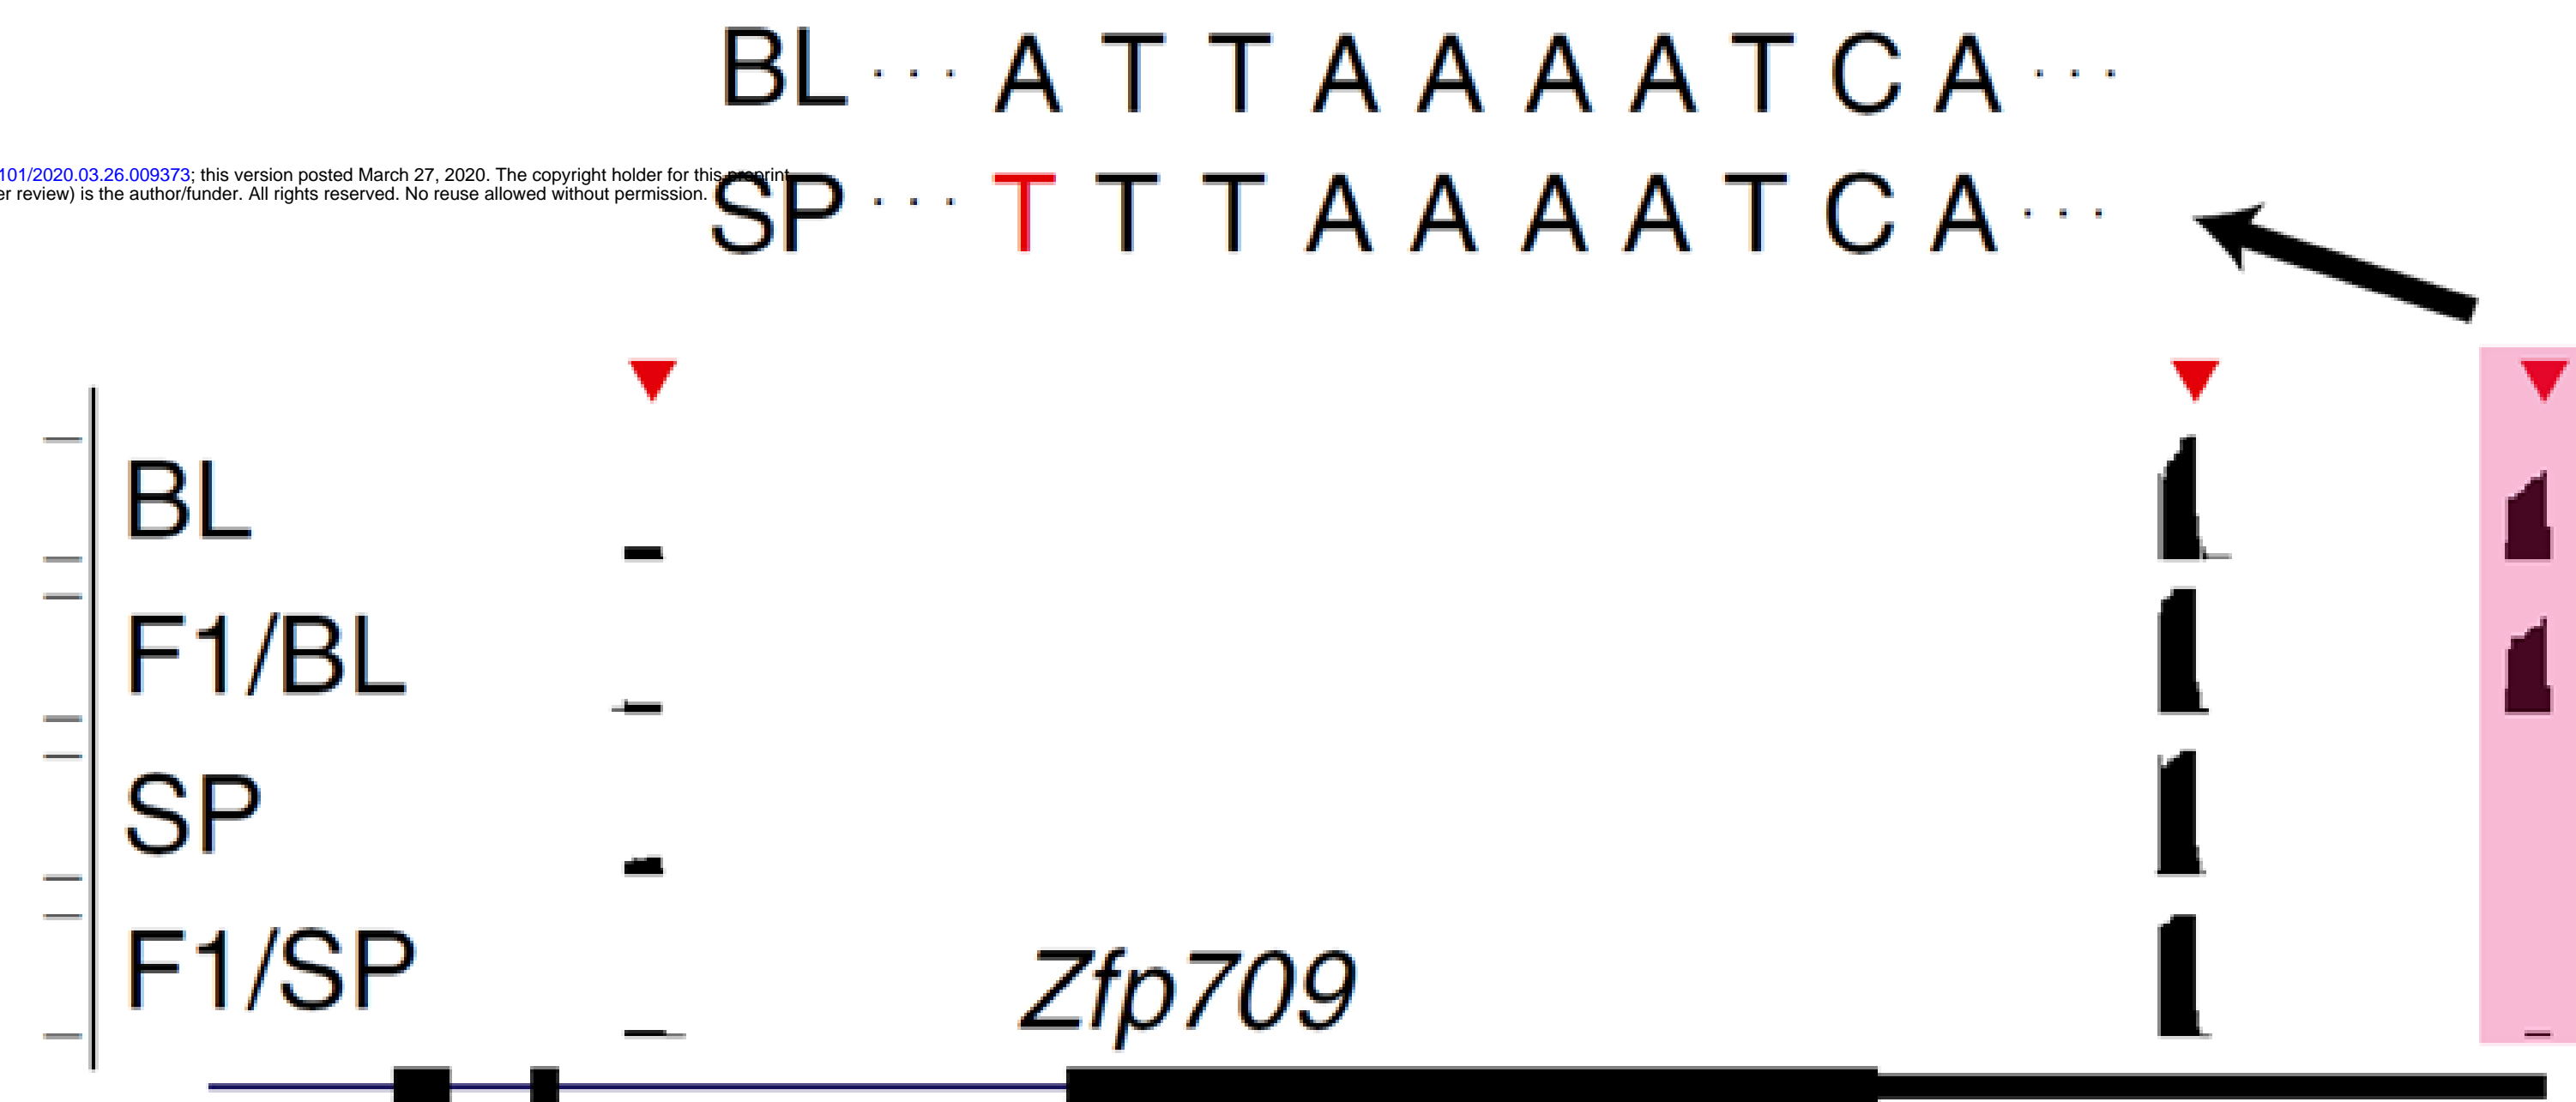

B

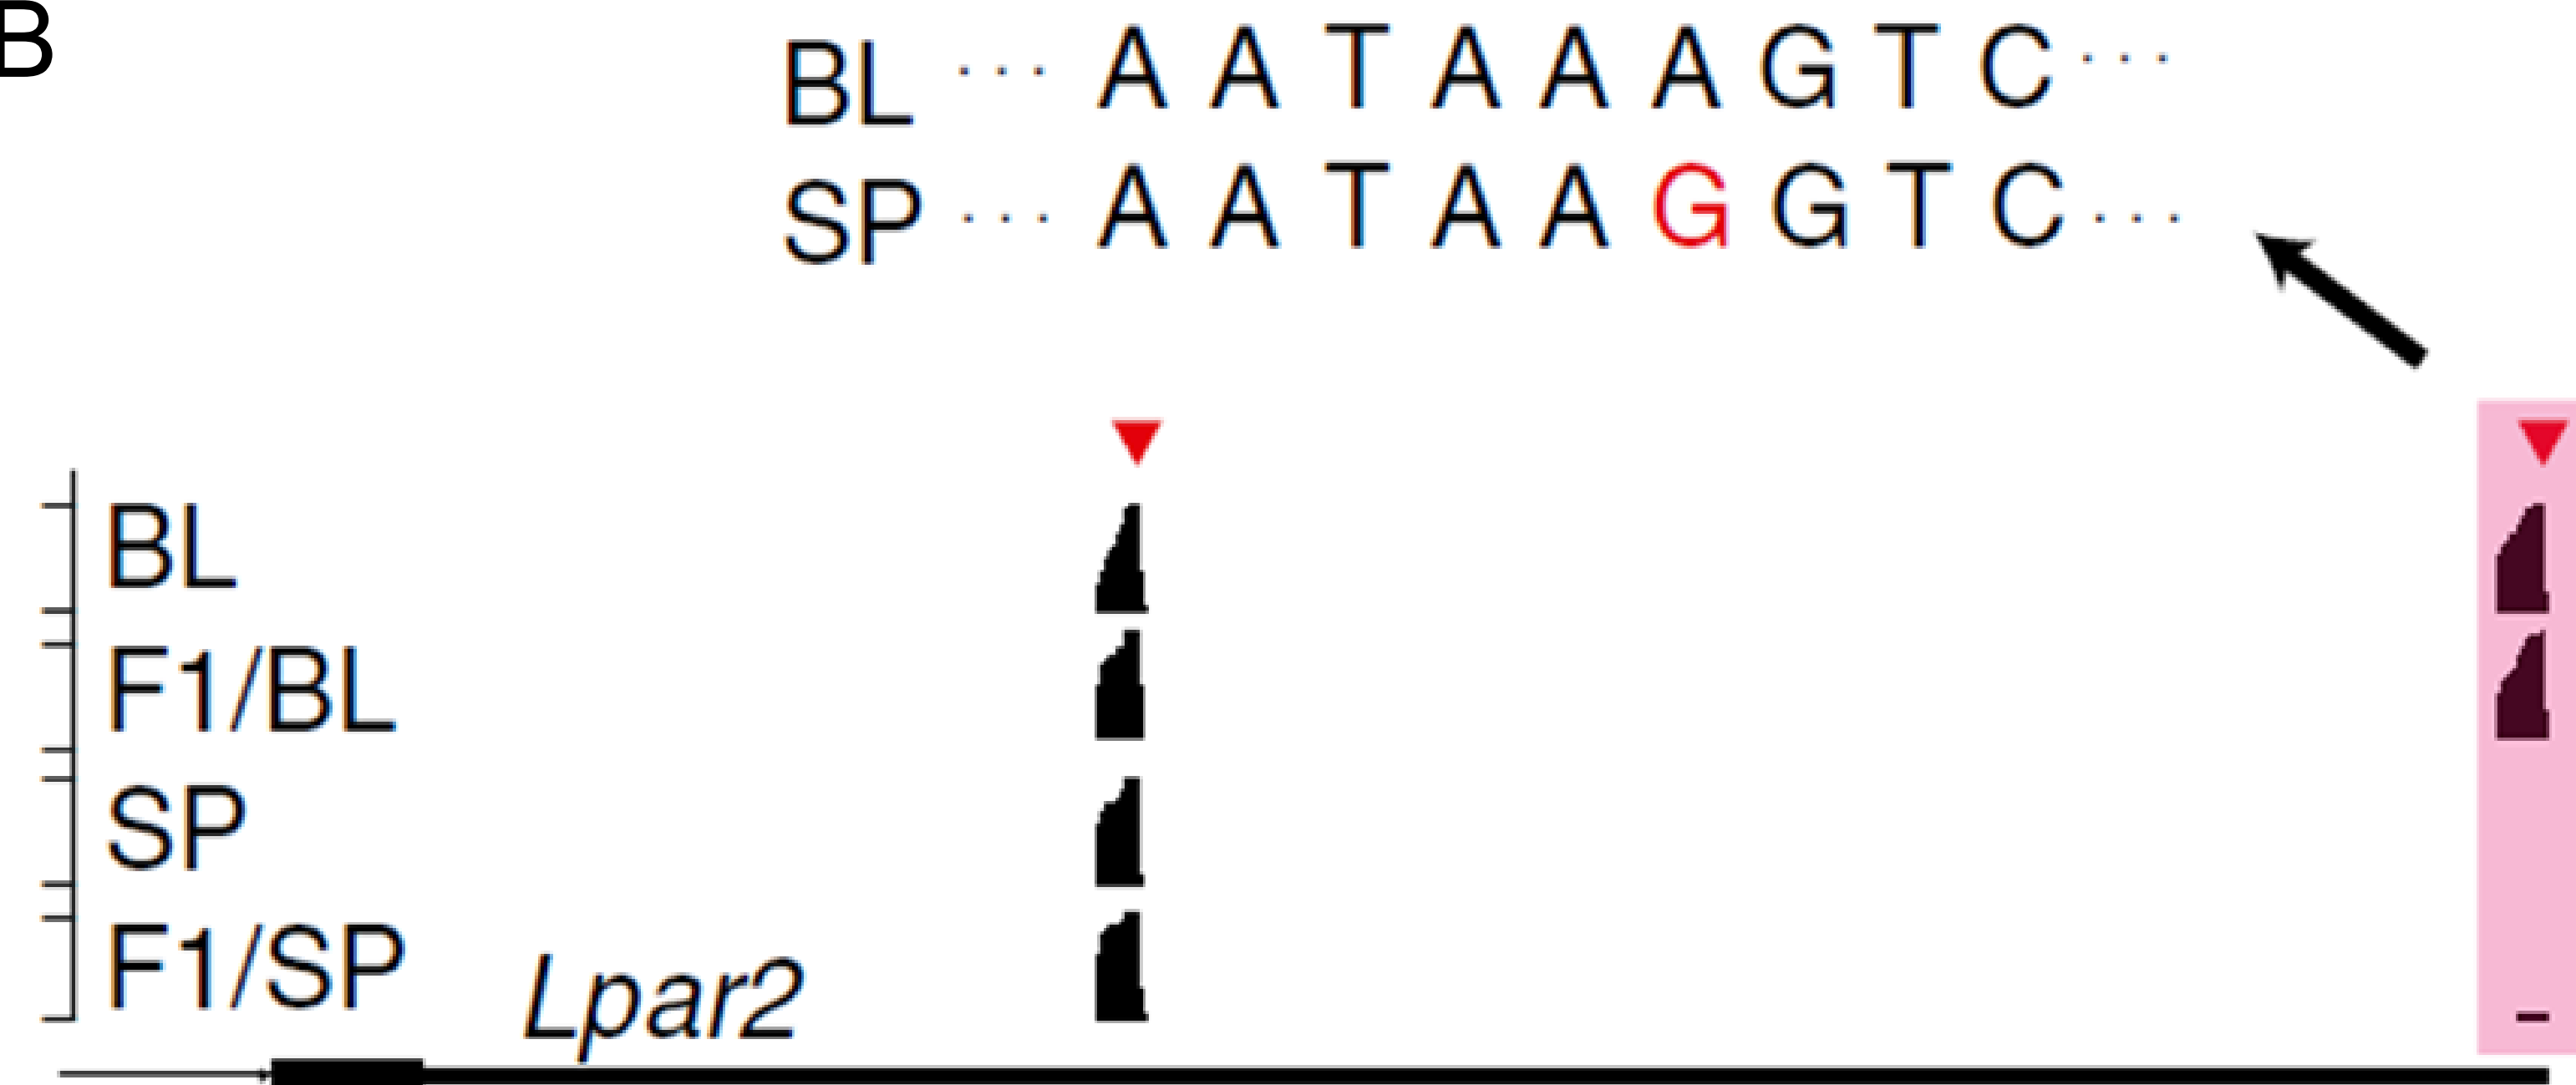

C

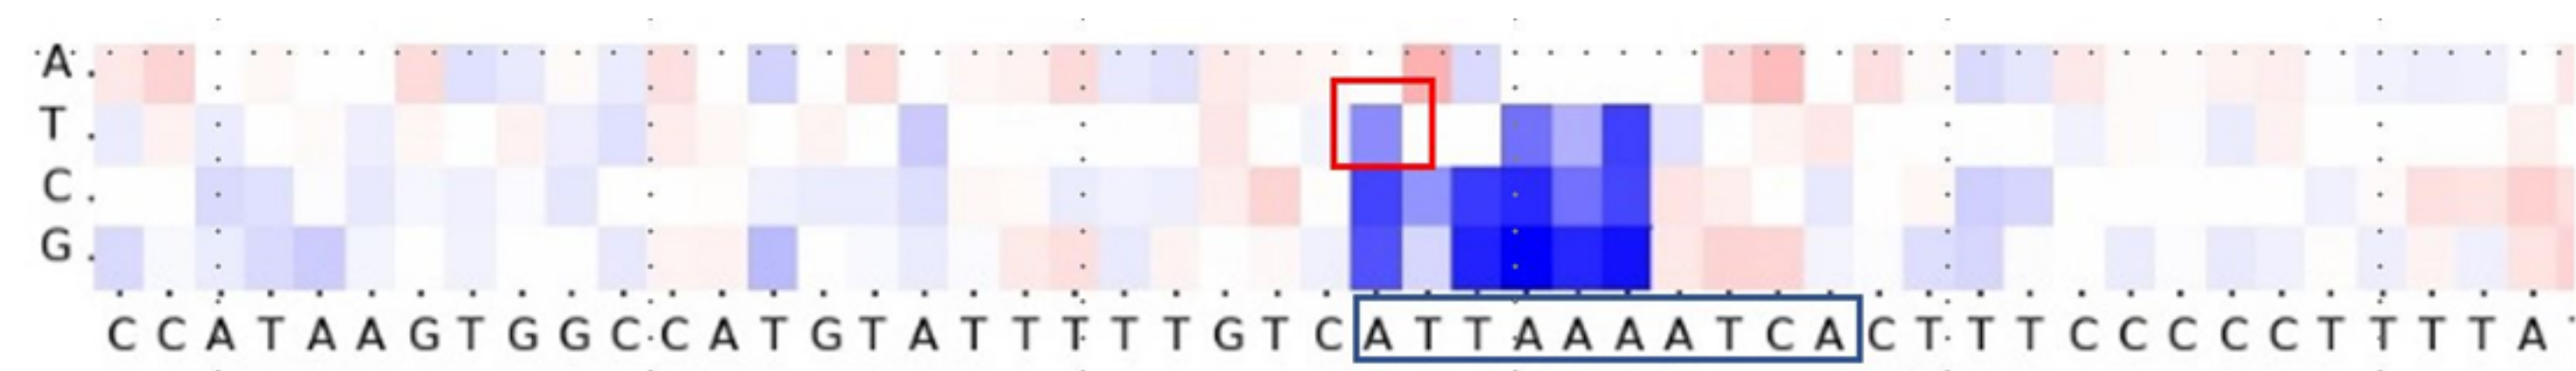

D

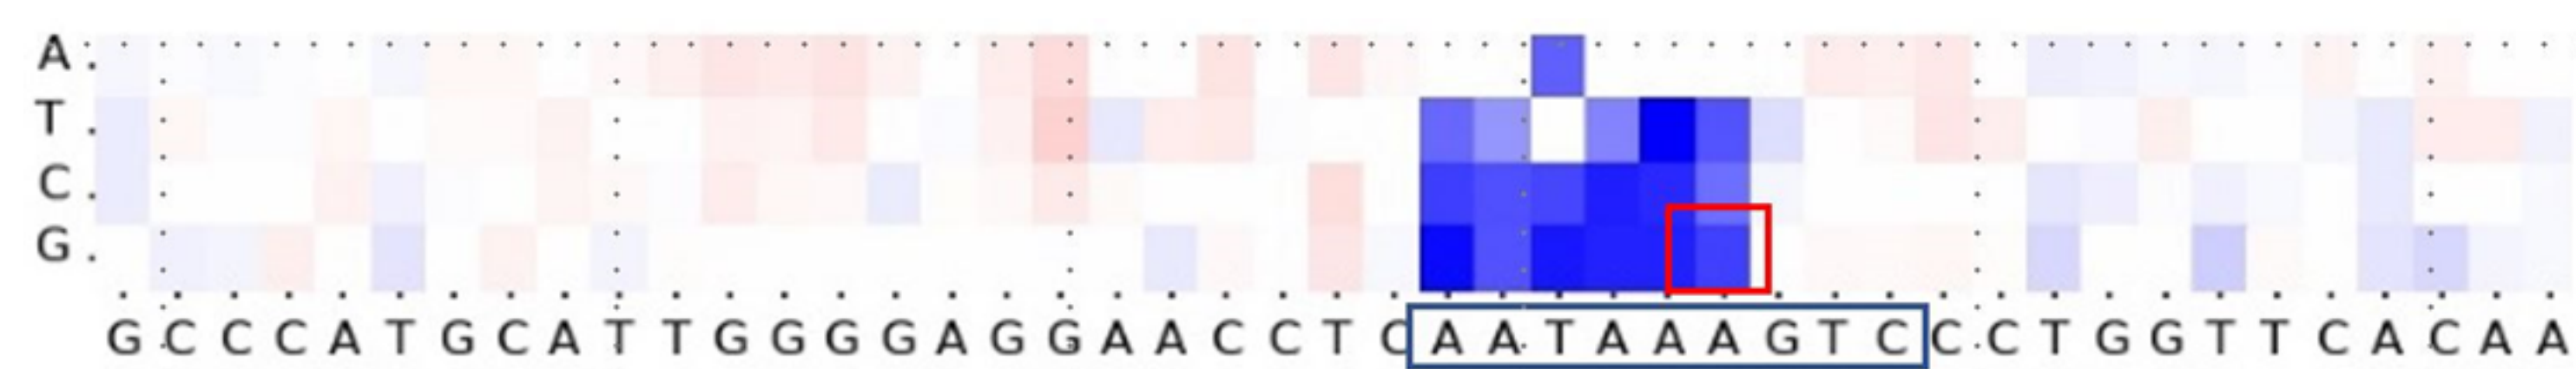

A

BL ... A A A T T G ...  
 SP ... A A A T T T T T T G ...

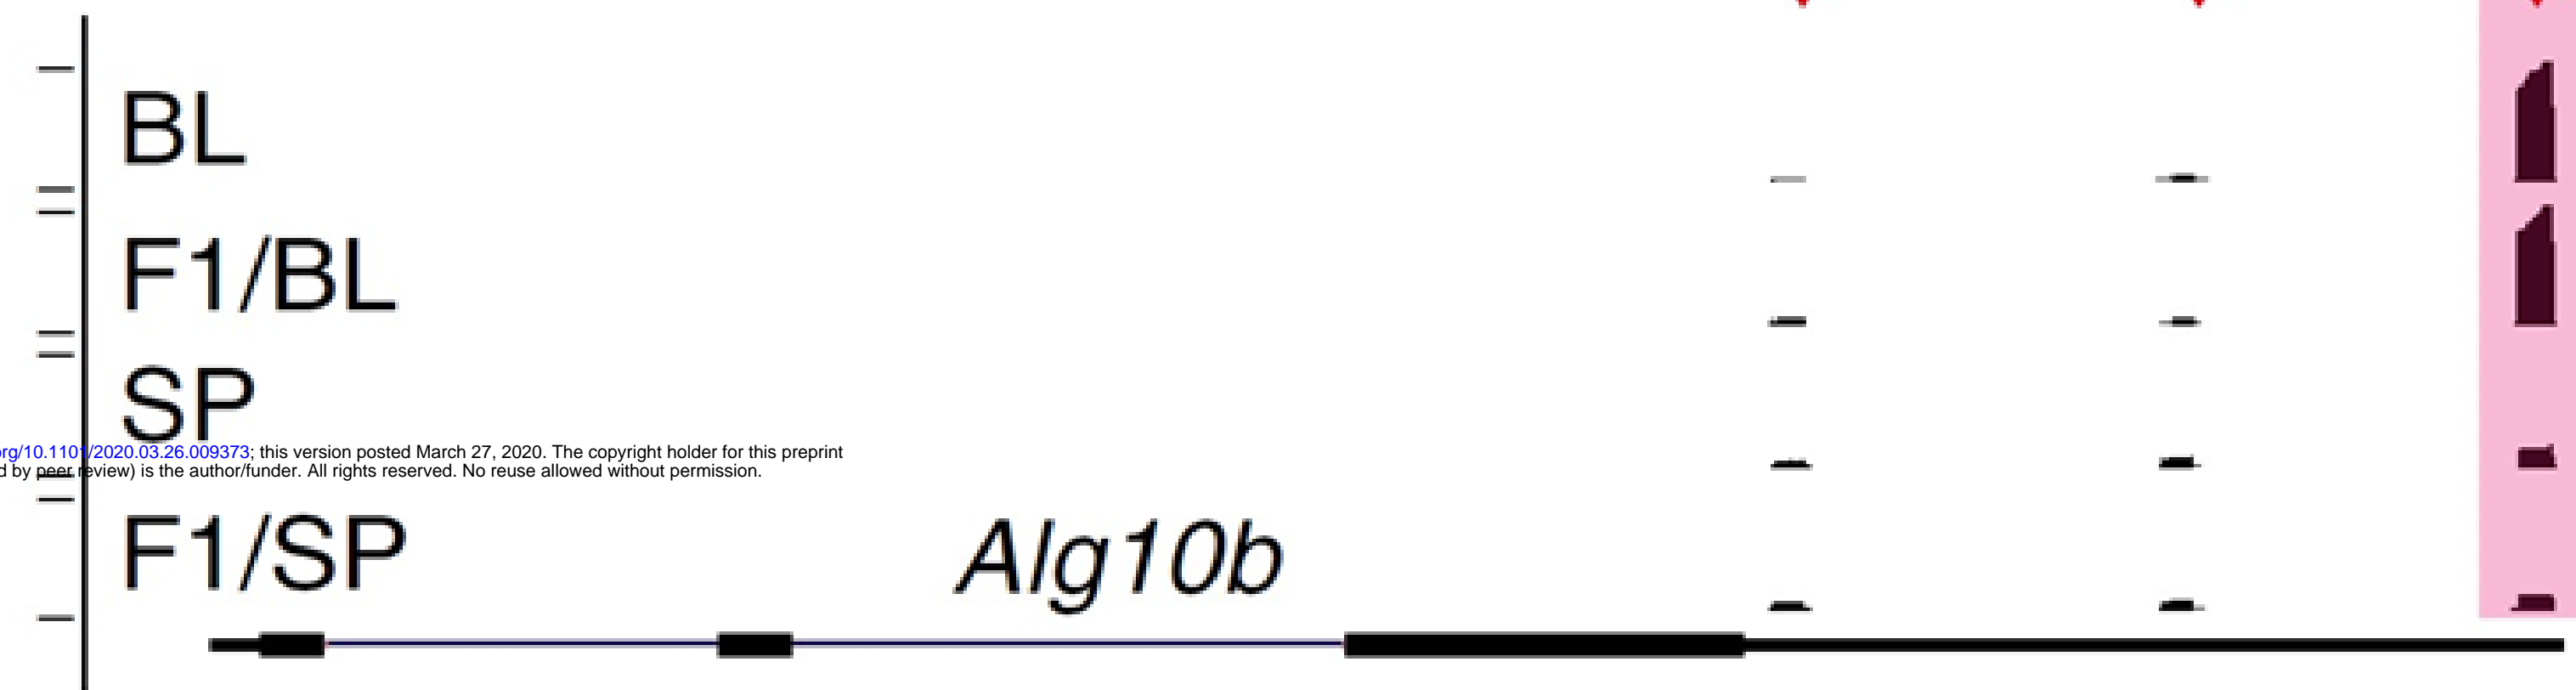

bioRxiv preprint doi: <https://doi.org/10.1101/2020.03.26.009373>; this version posted March 27, 2020. The copyright holder for this preprint (which was not certified by peer review) is the author/funder. All rights reserved. No reuse allowed without permission.

B

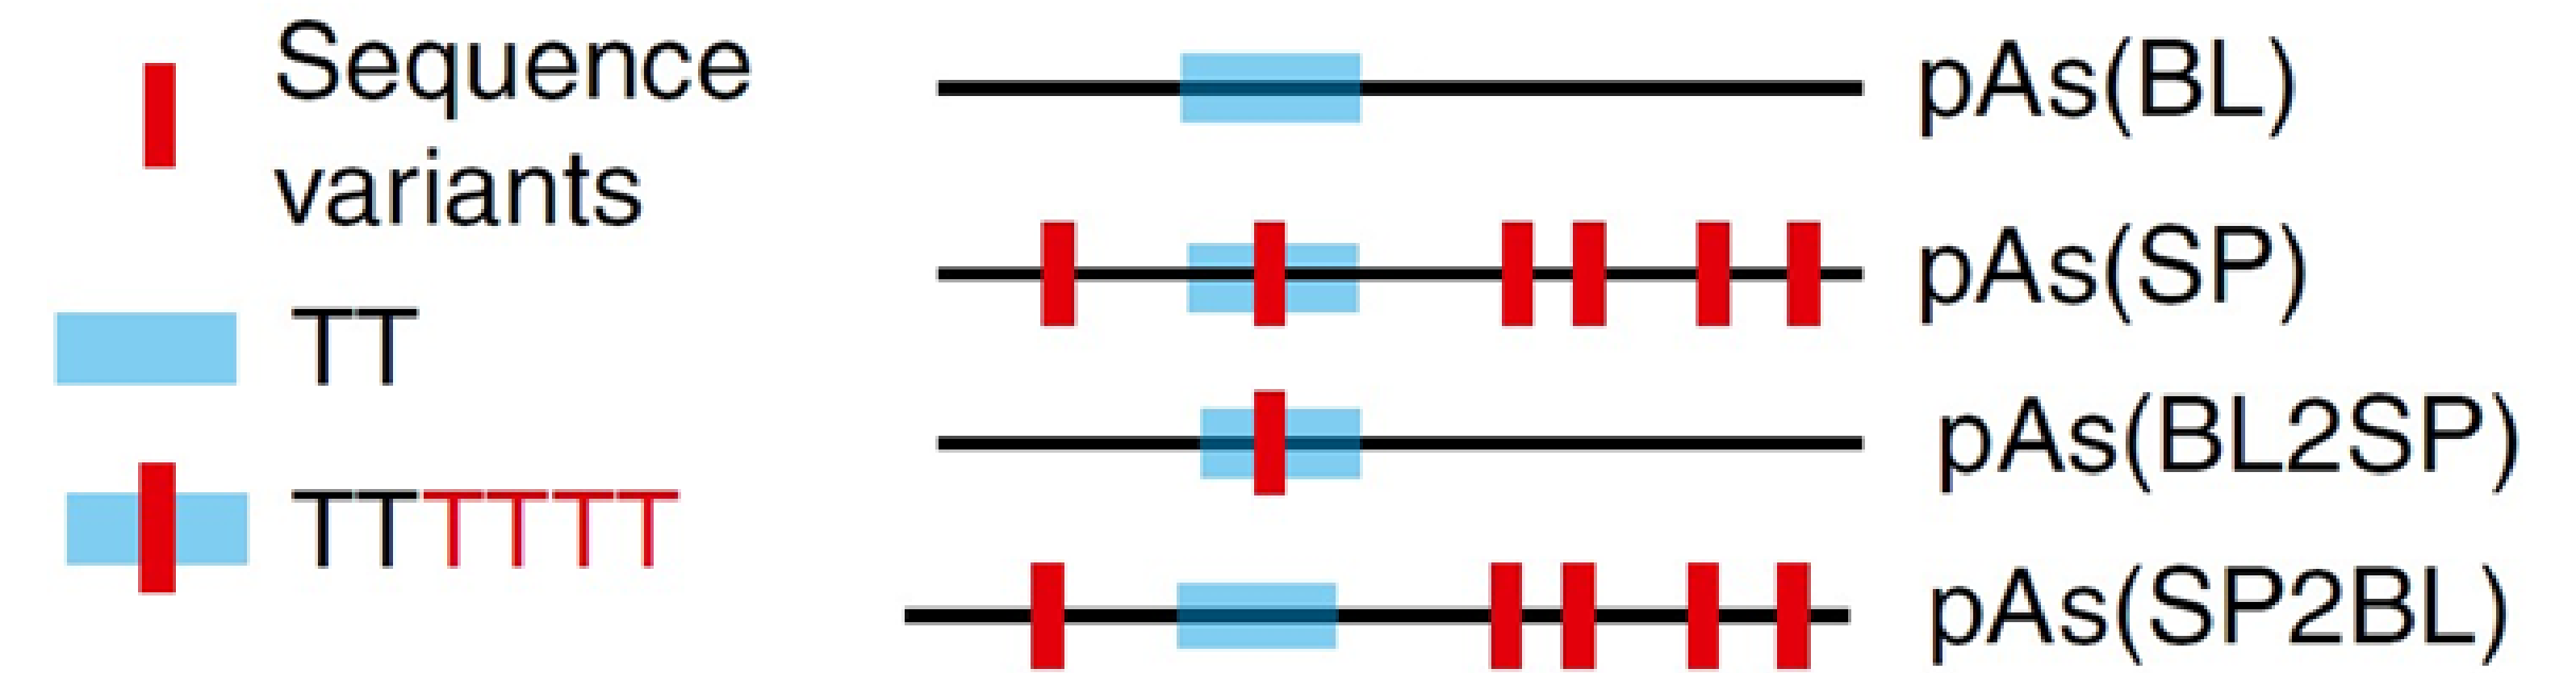

C

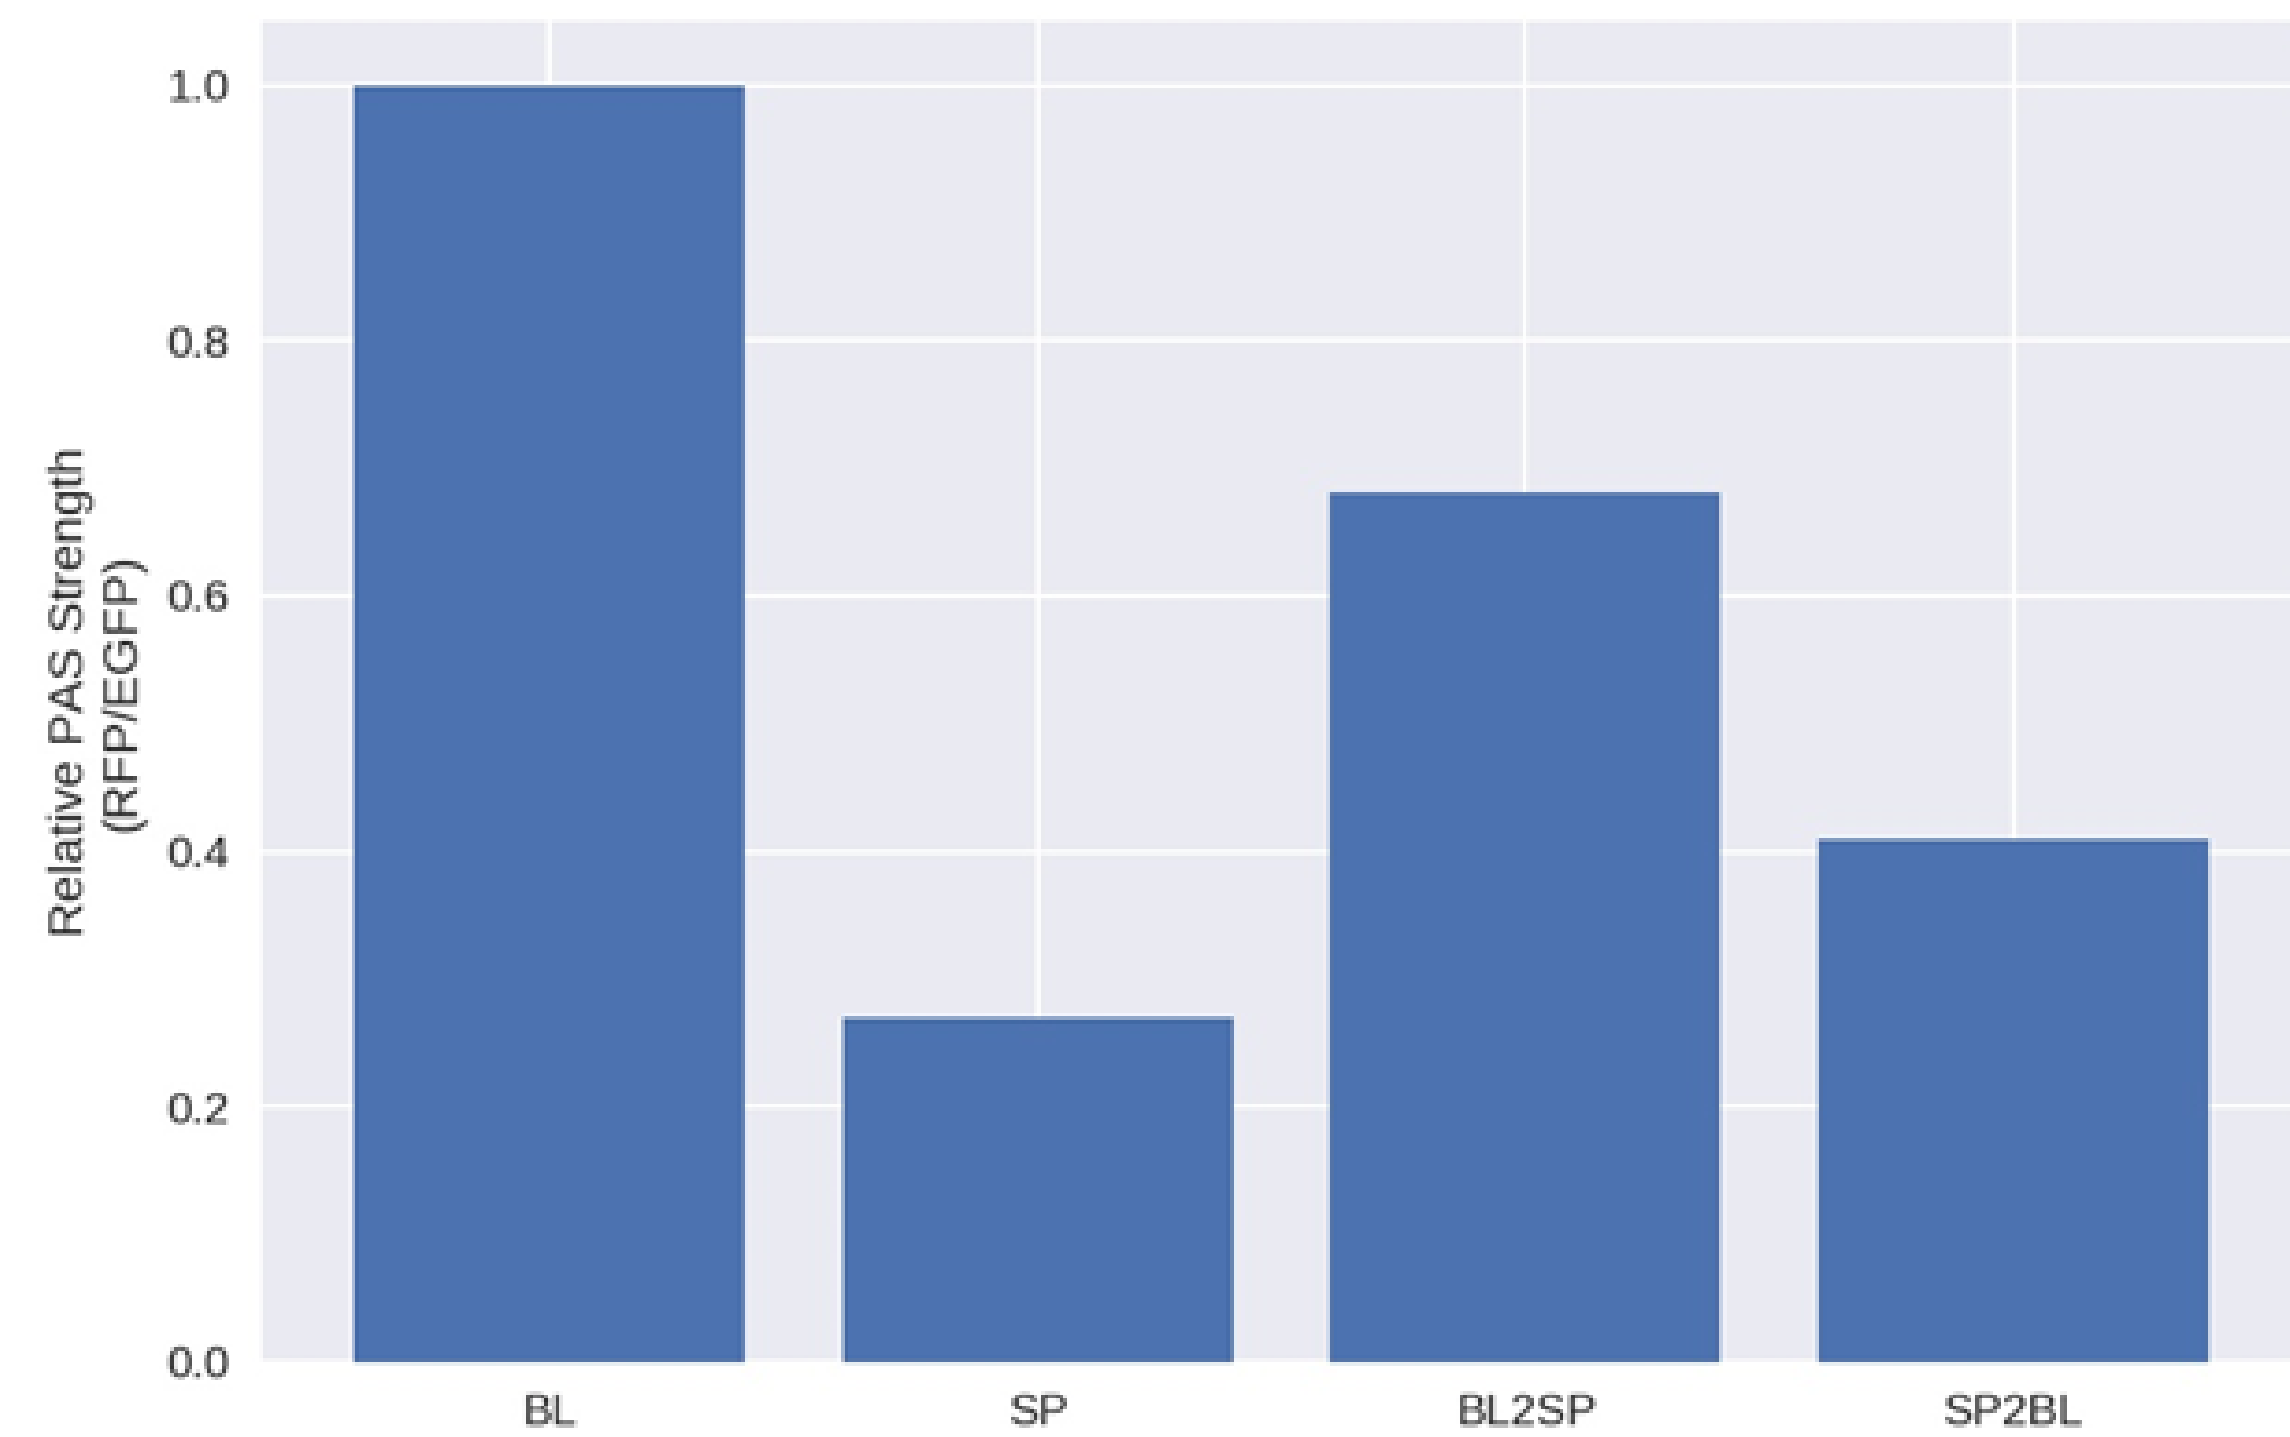

D

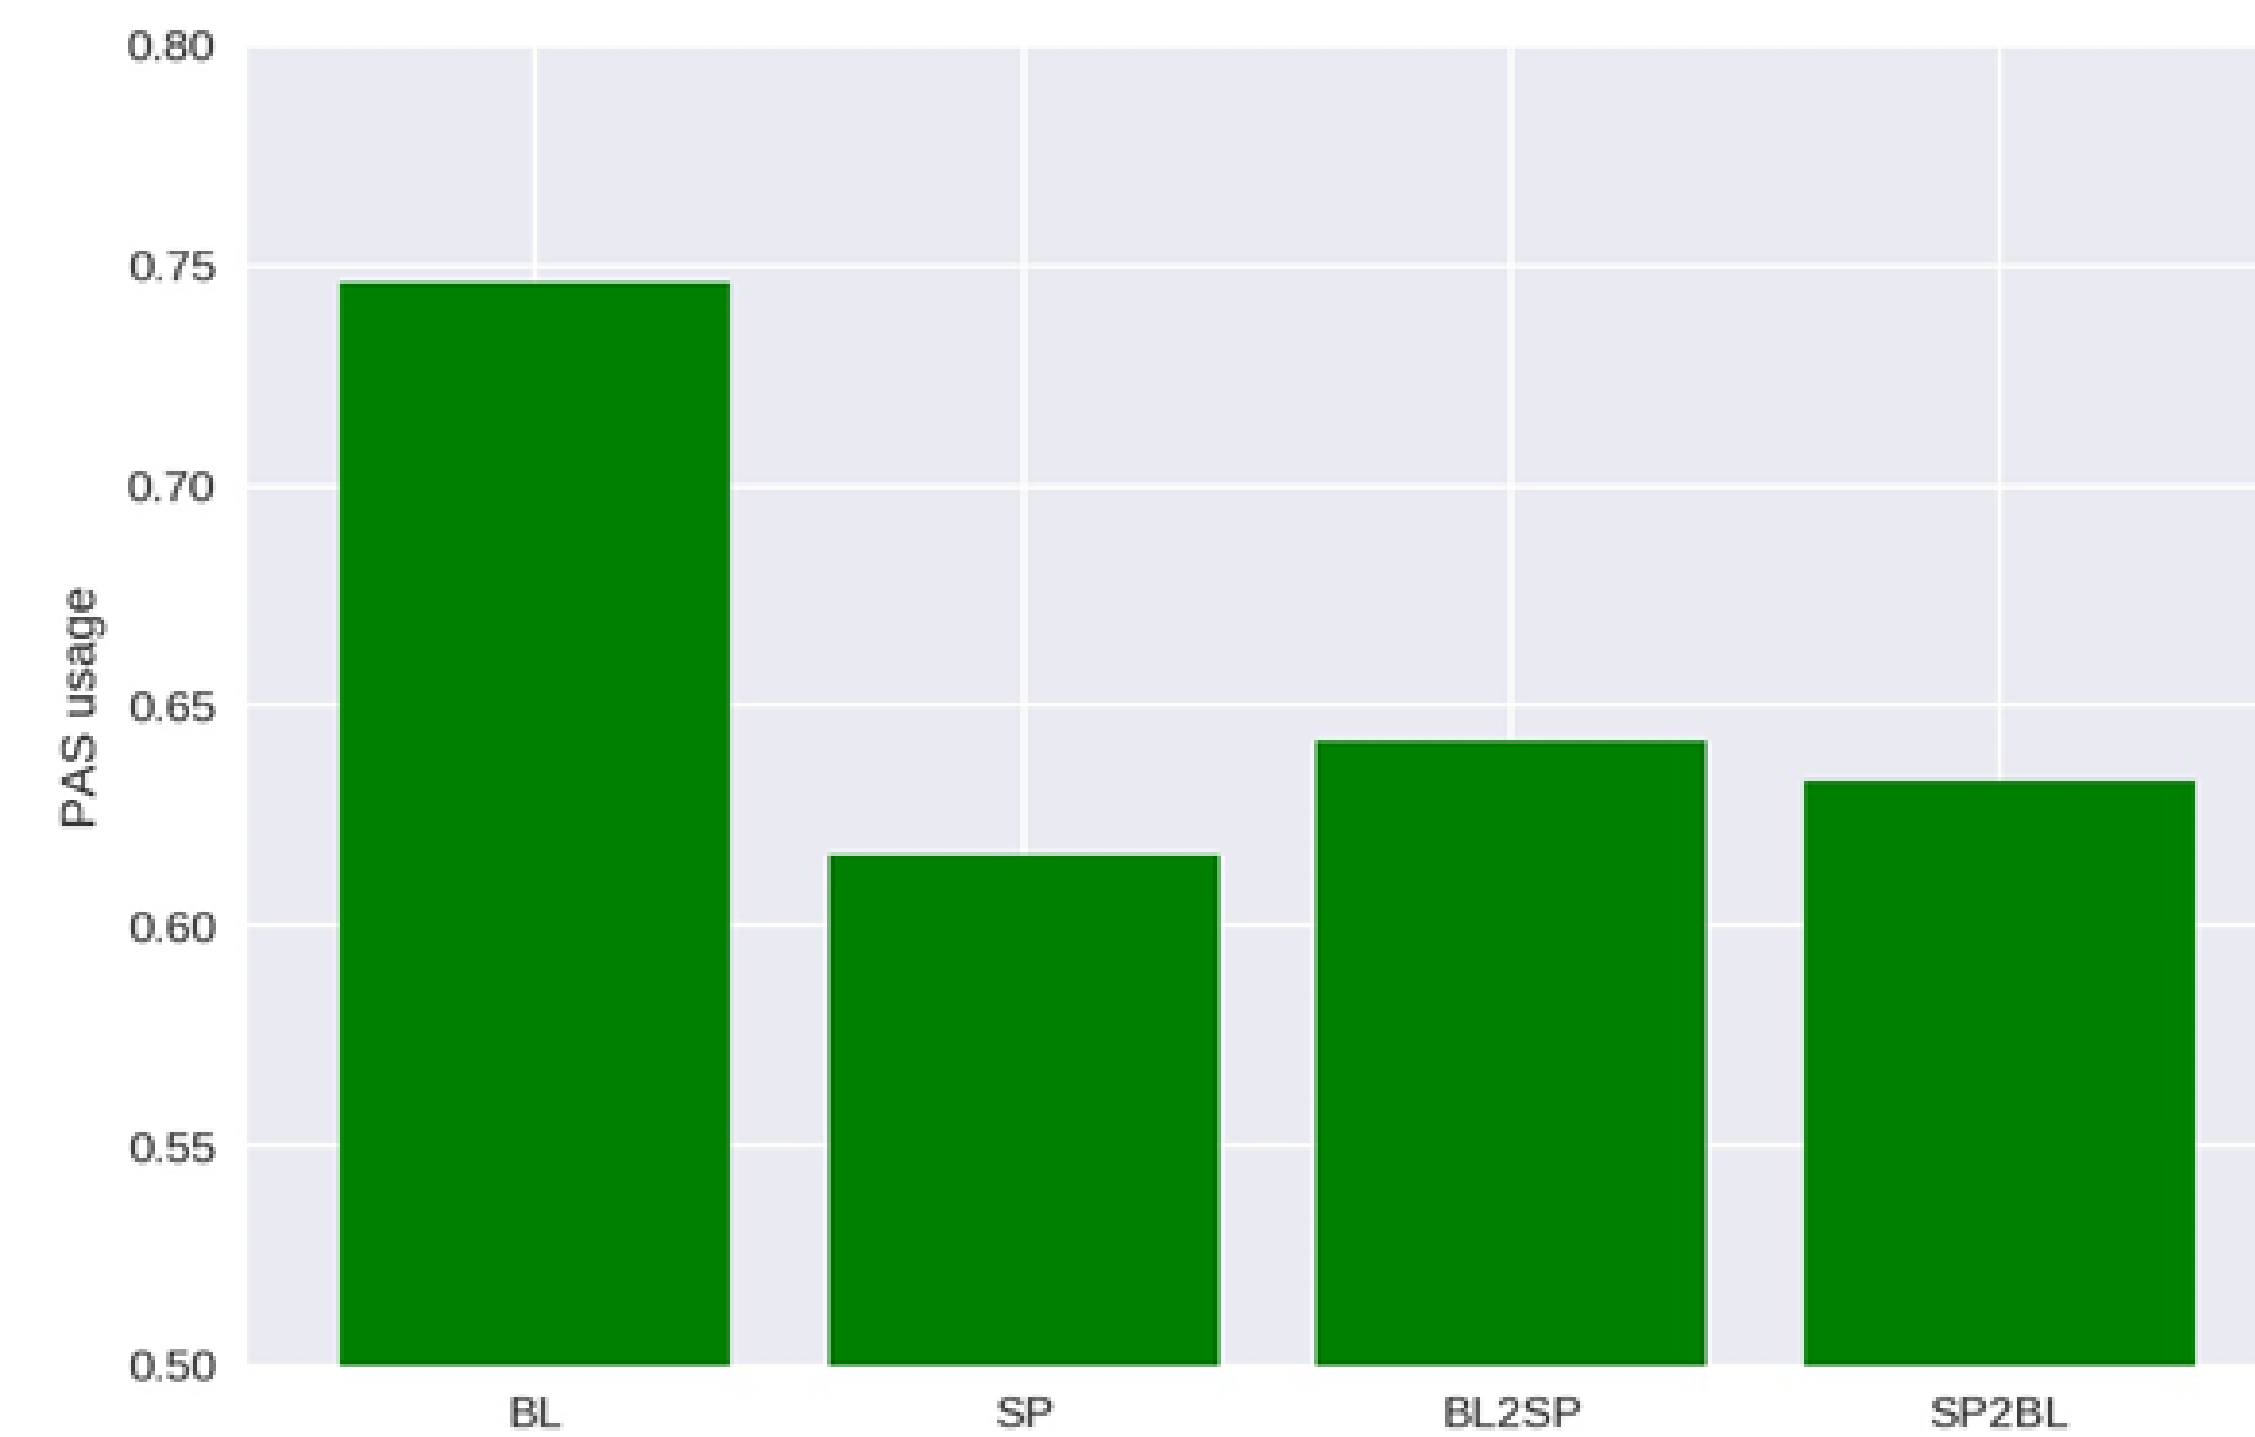



A

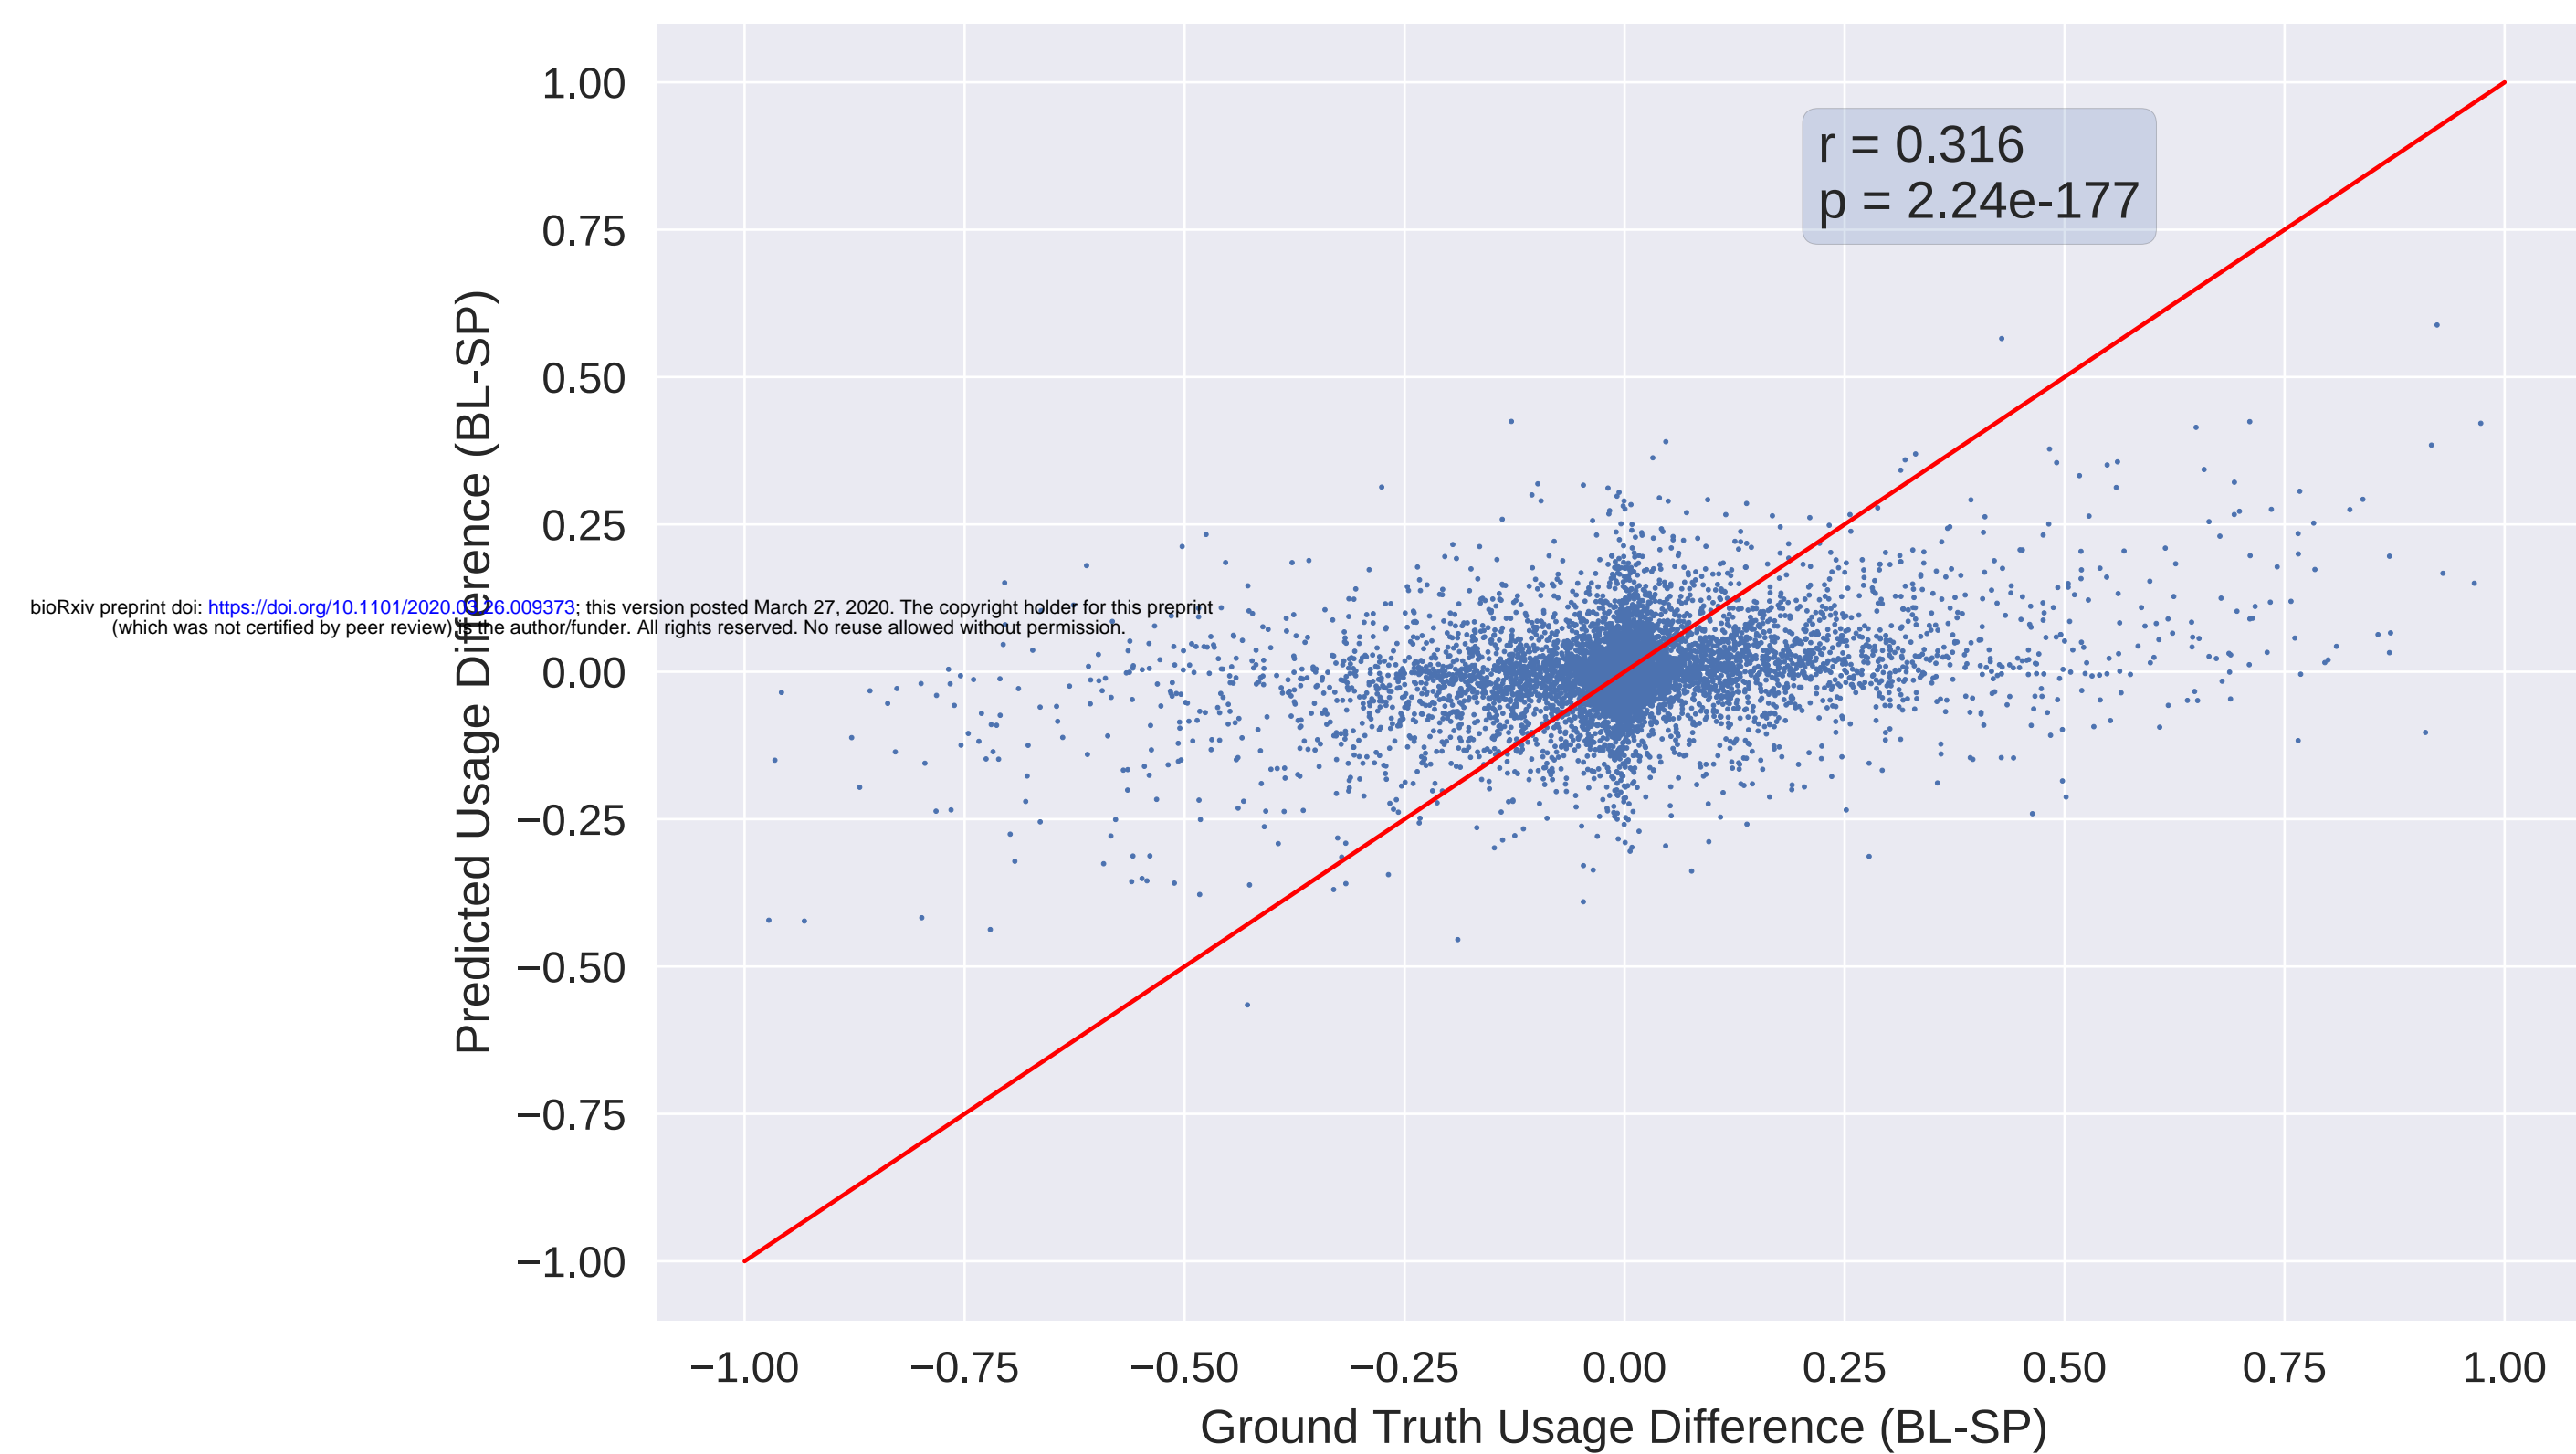

B

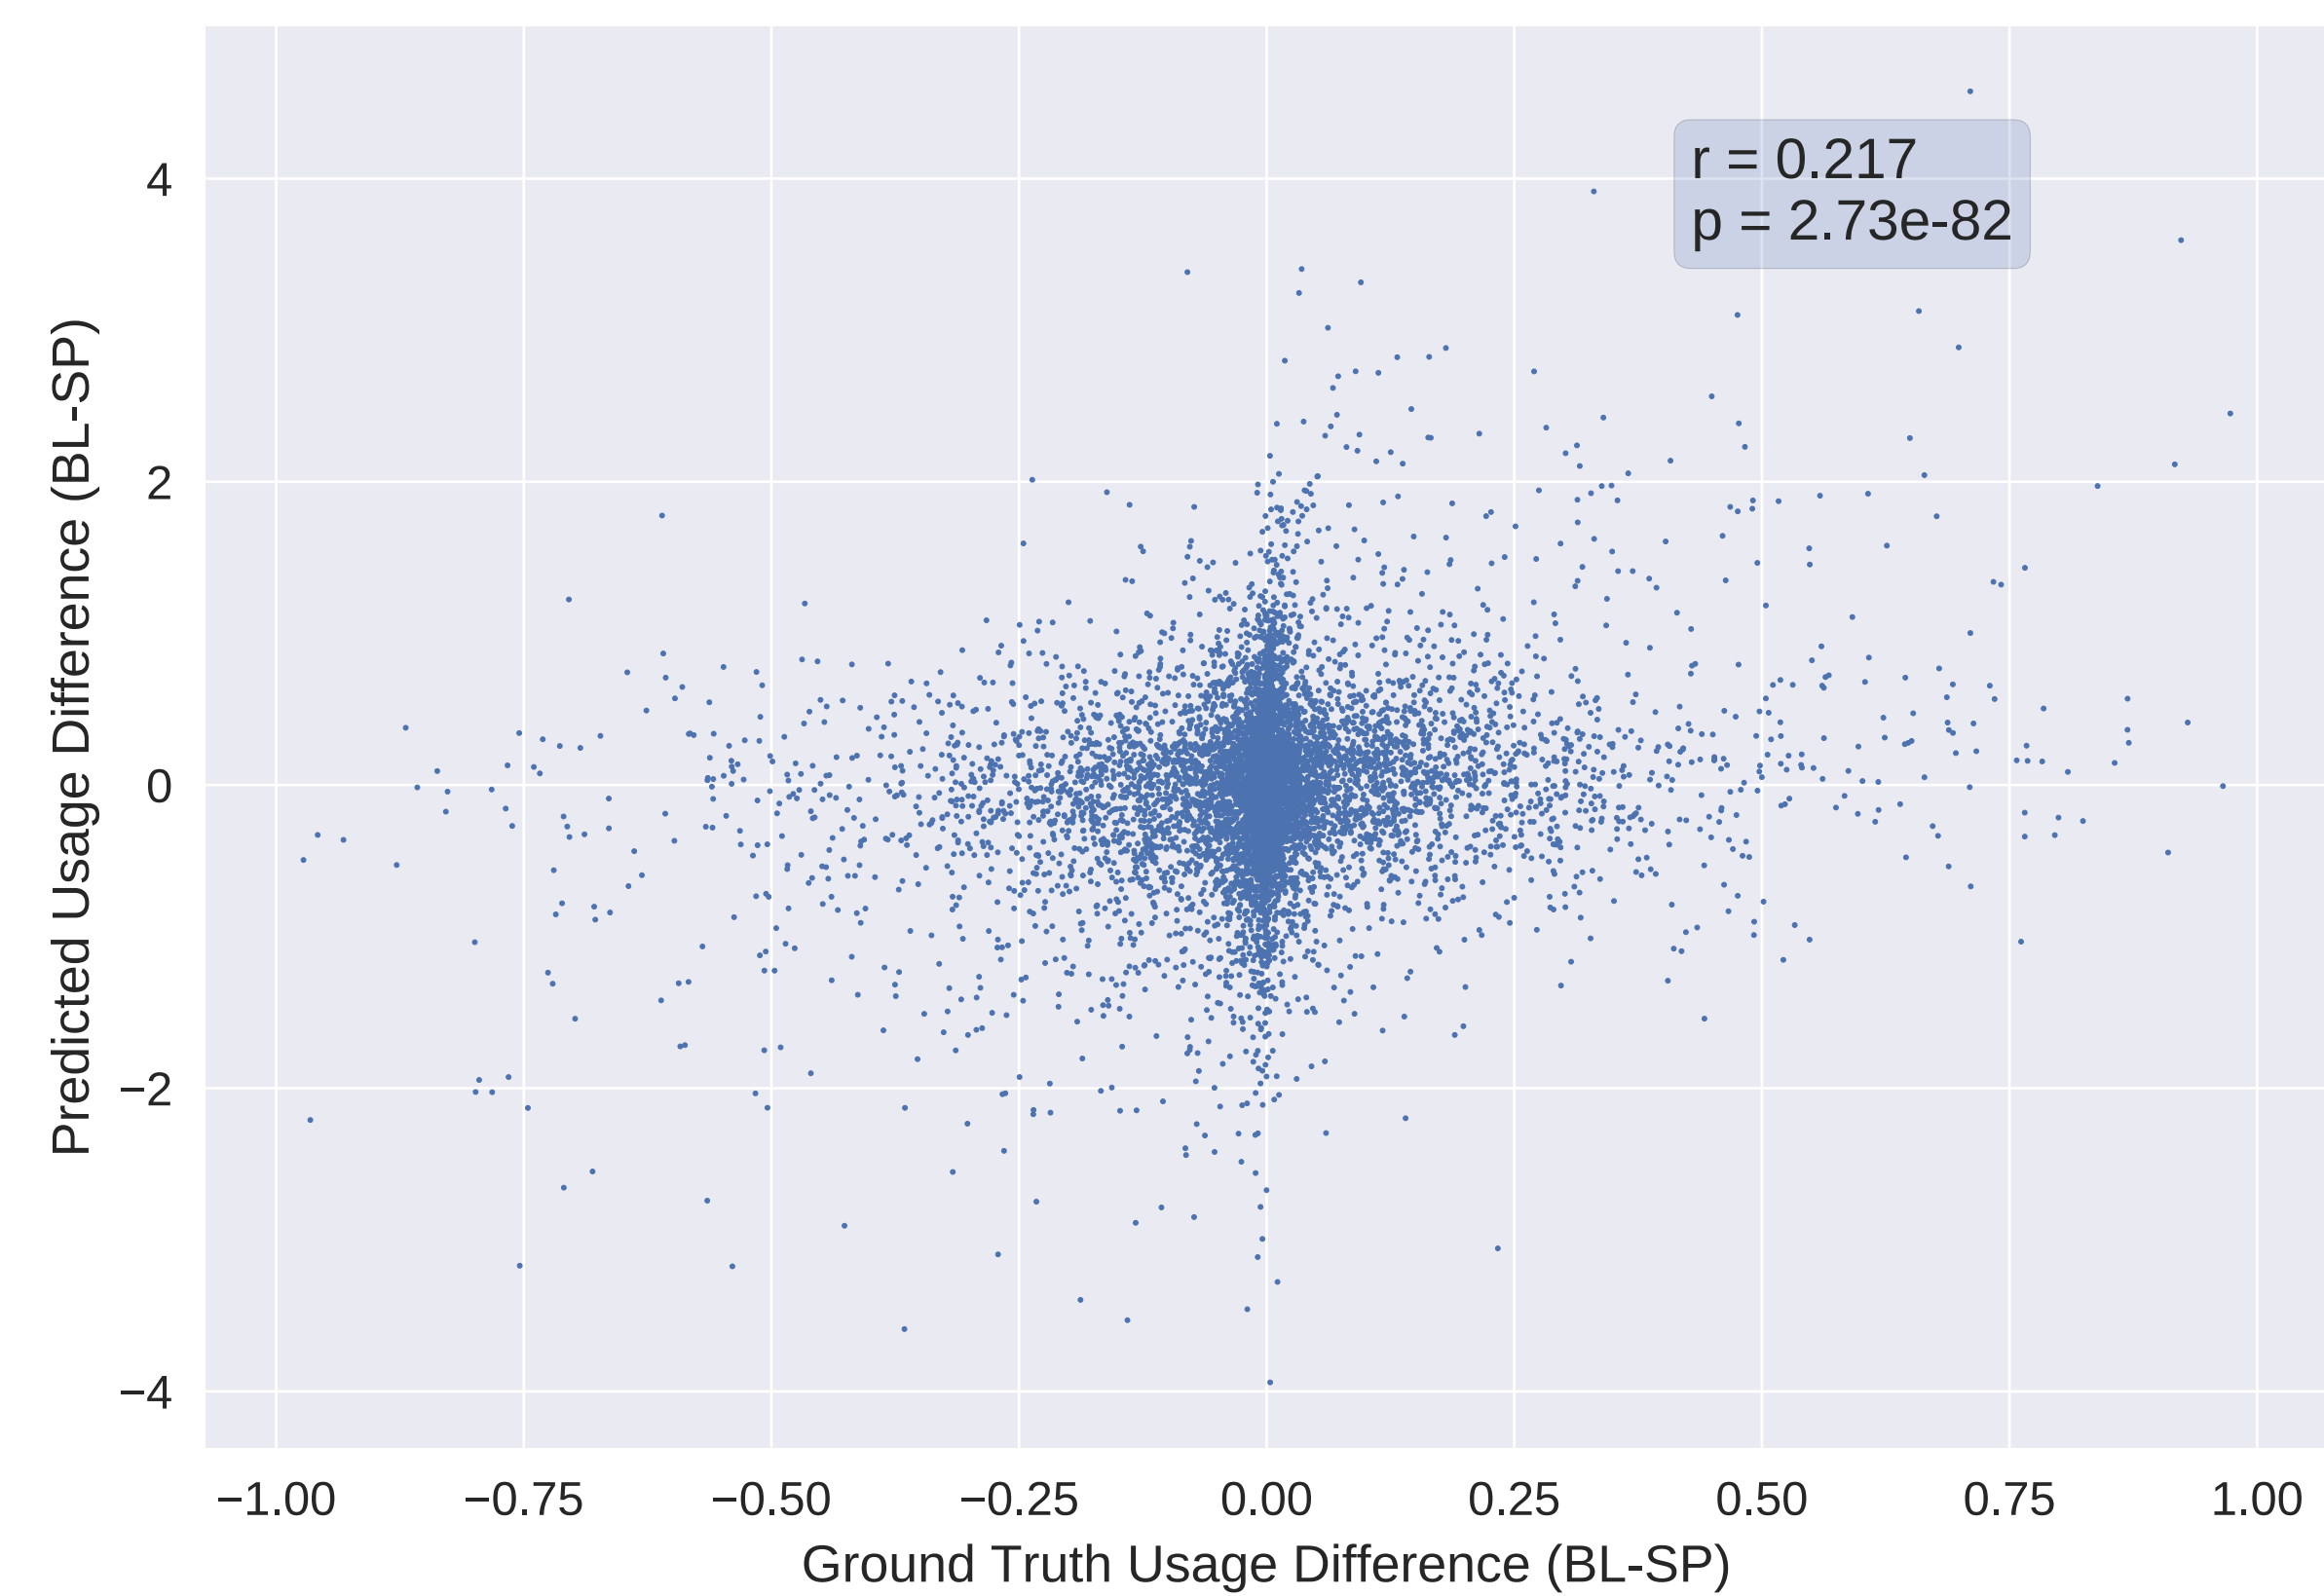

C

| Min. Allelic Usage Difference |           | 0.1                   | 0.2                   | 0.3                   | 0.4                   | 0.6                   | 0.8                  |
|-------------------------------|-----------|-----------------------|-----------------------|-----------------------|-----------------------|-----------------------|----------------------|
| DeeReCT-APA                   | Pearson R | 0.419                 | 0.486                 | 0.522                 | 0.543                 | 0.657                 | 0.744                |
|                               | p value   | $1.9 \times 10^{-93}$ | $1.2 \times 10^{-67}$ | $4.2 \times 10^{-45}$ | $5.0 \times 10^{-30}$ | $7.9 \times 10^{-16}$ | $1.5 \times 10^{-4}$ |
| Polyadenylation Code          | Pearson R | 0.316                 | 0.360                 | 0.401                 | 0.433                 | 0.502                 | 0.543                |
|                               | p value   | $1.2 \times 10^{-53}$ | $5.5 \times 10^{-37}$ | $1.2 \times 10^{-22}$ | $1.9 \times 10^{-16}$ | $6.0 \times 10^{-8}$  | $4.7 \times 10^{-3}$ |

A

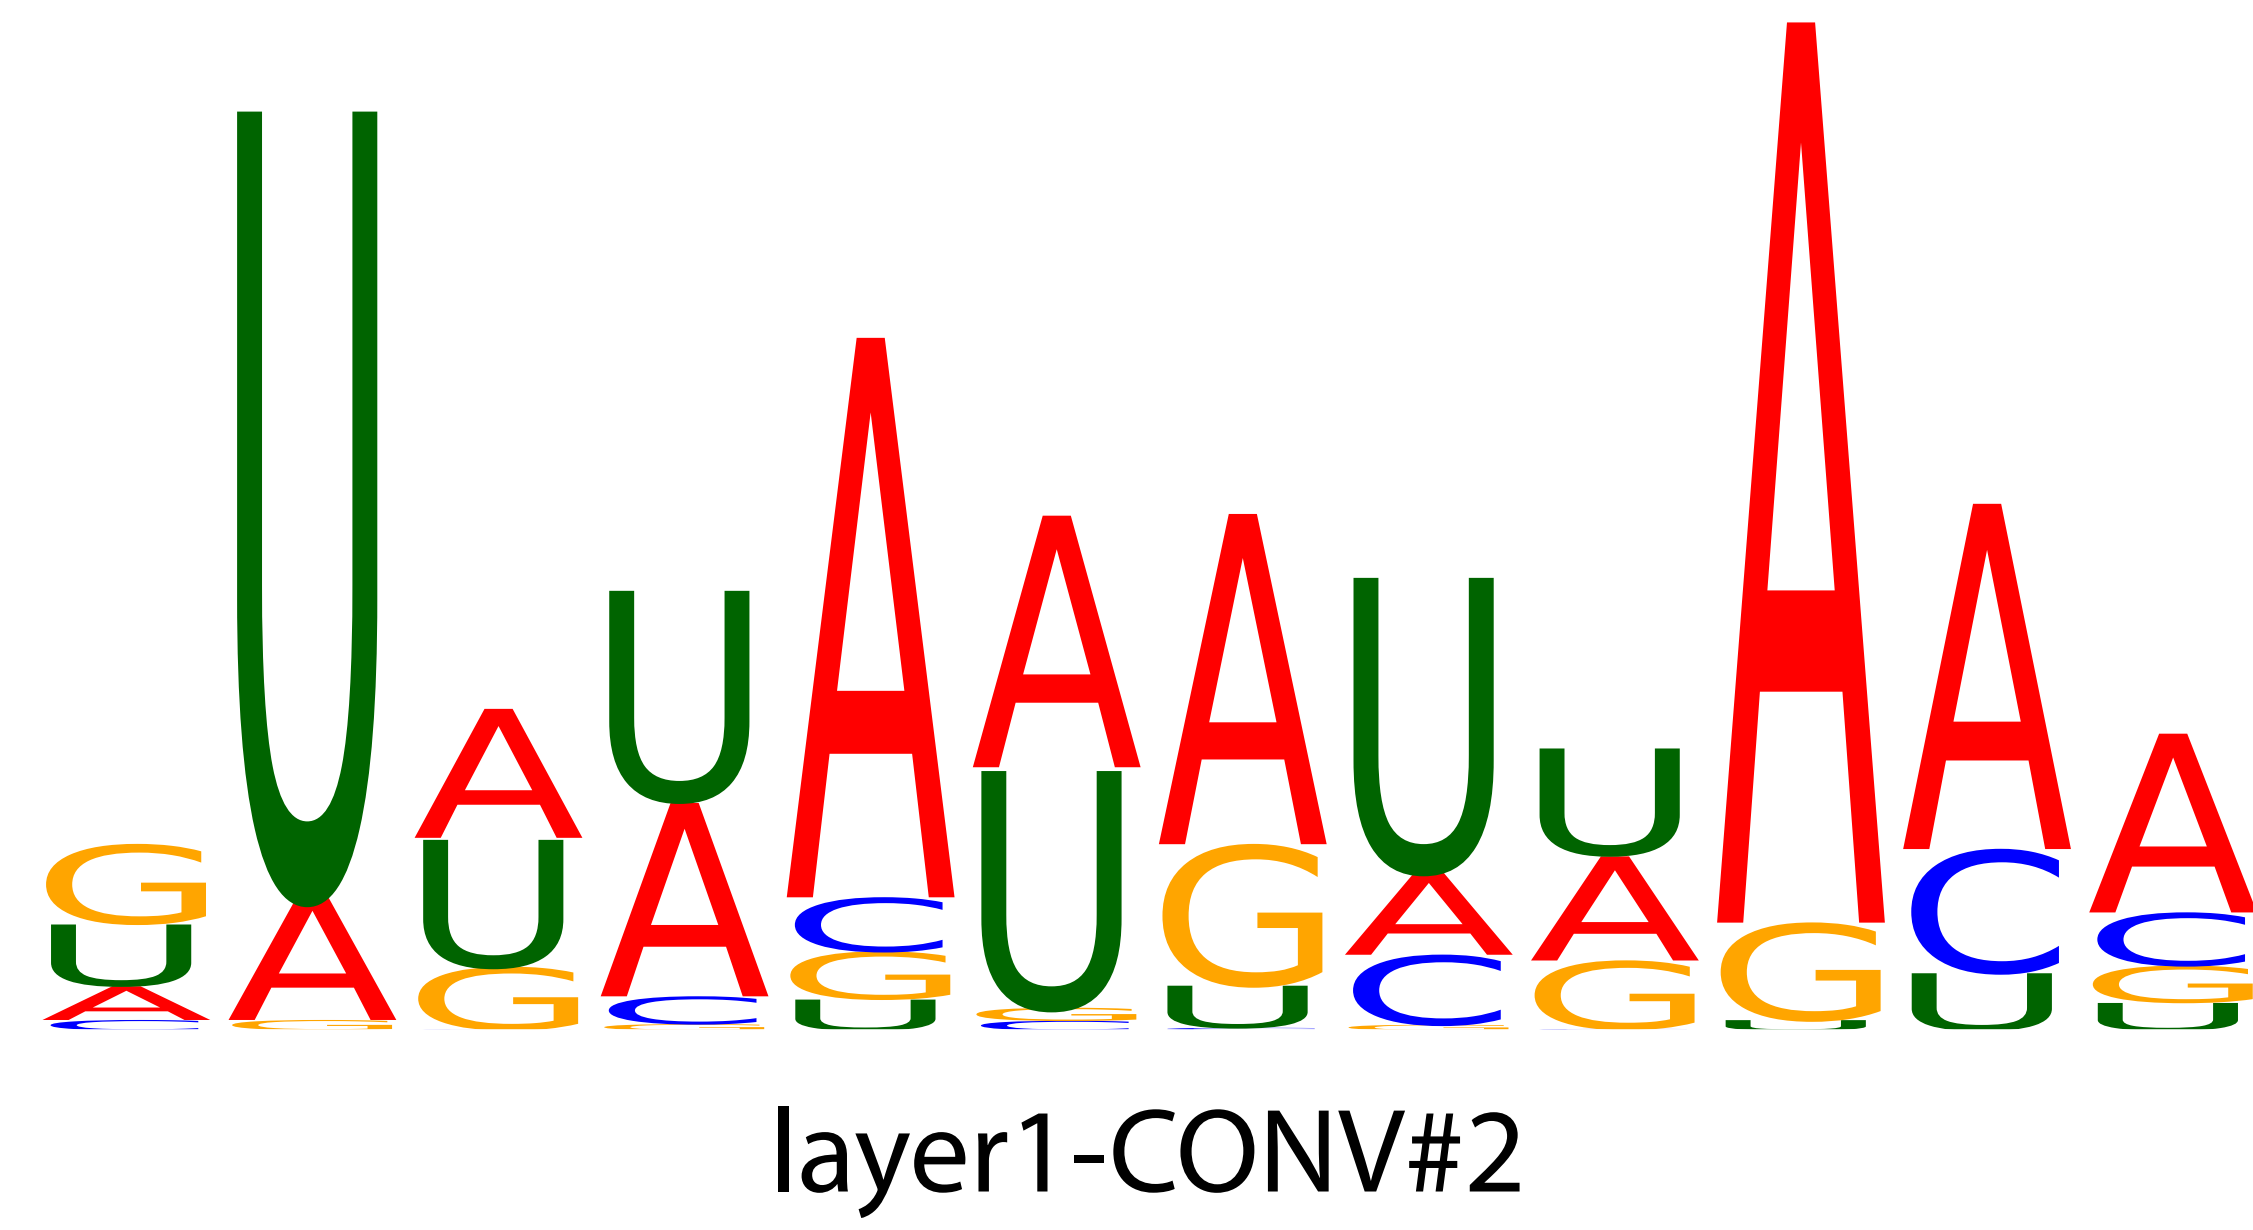

B

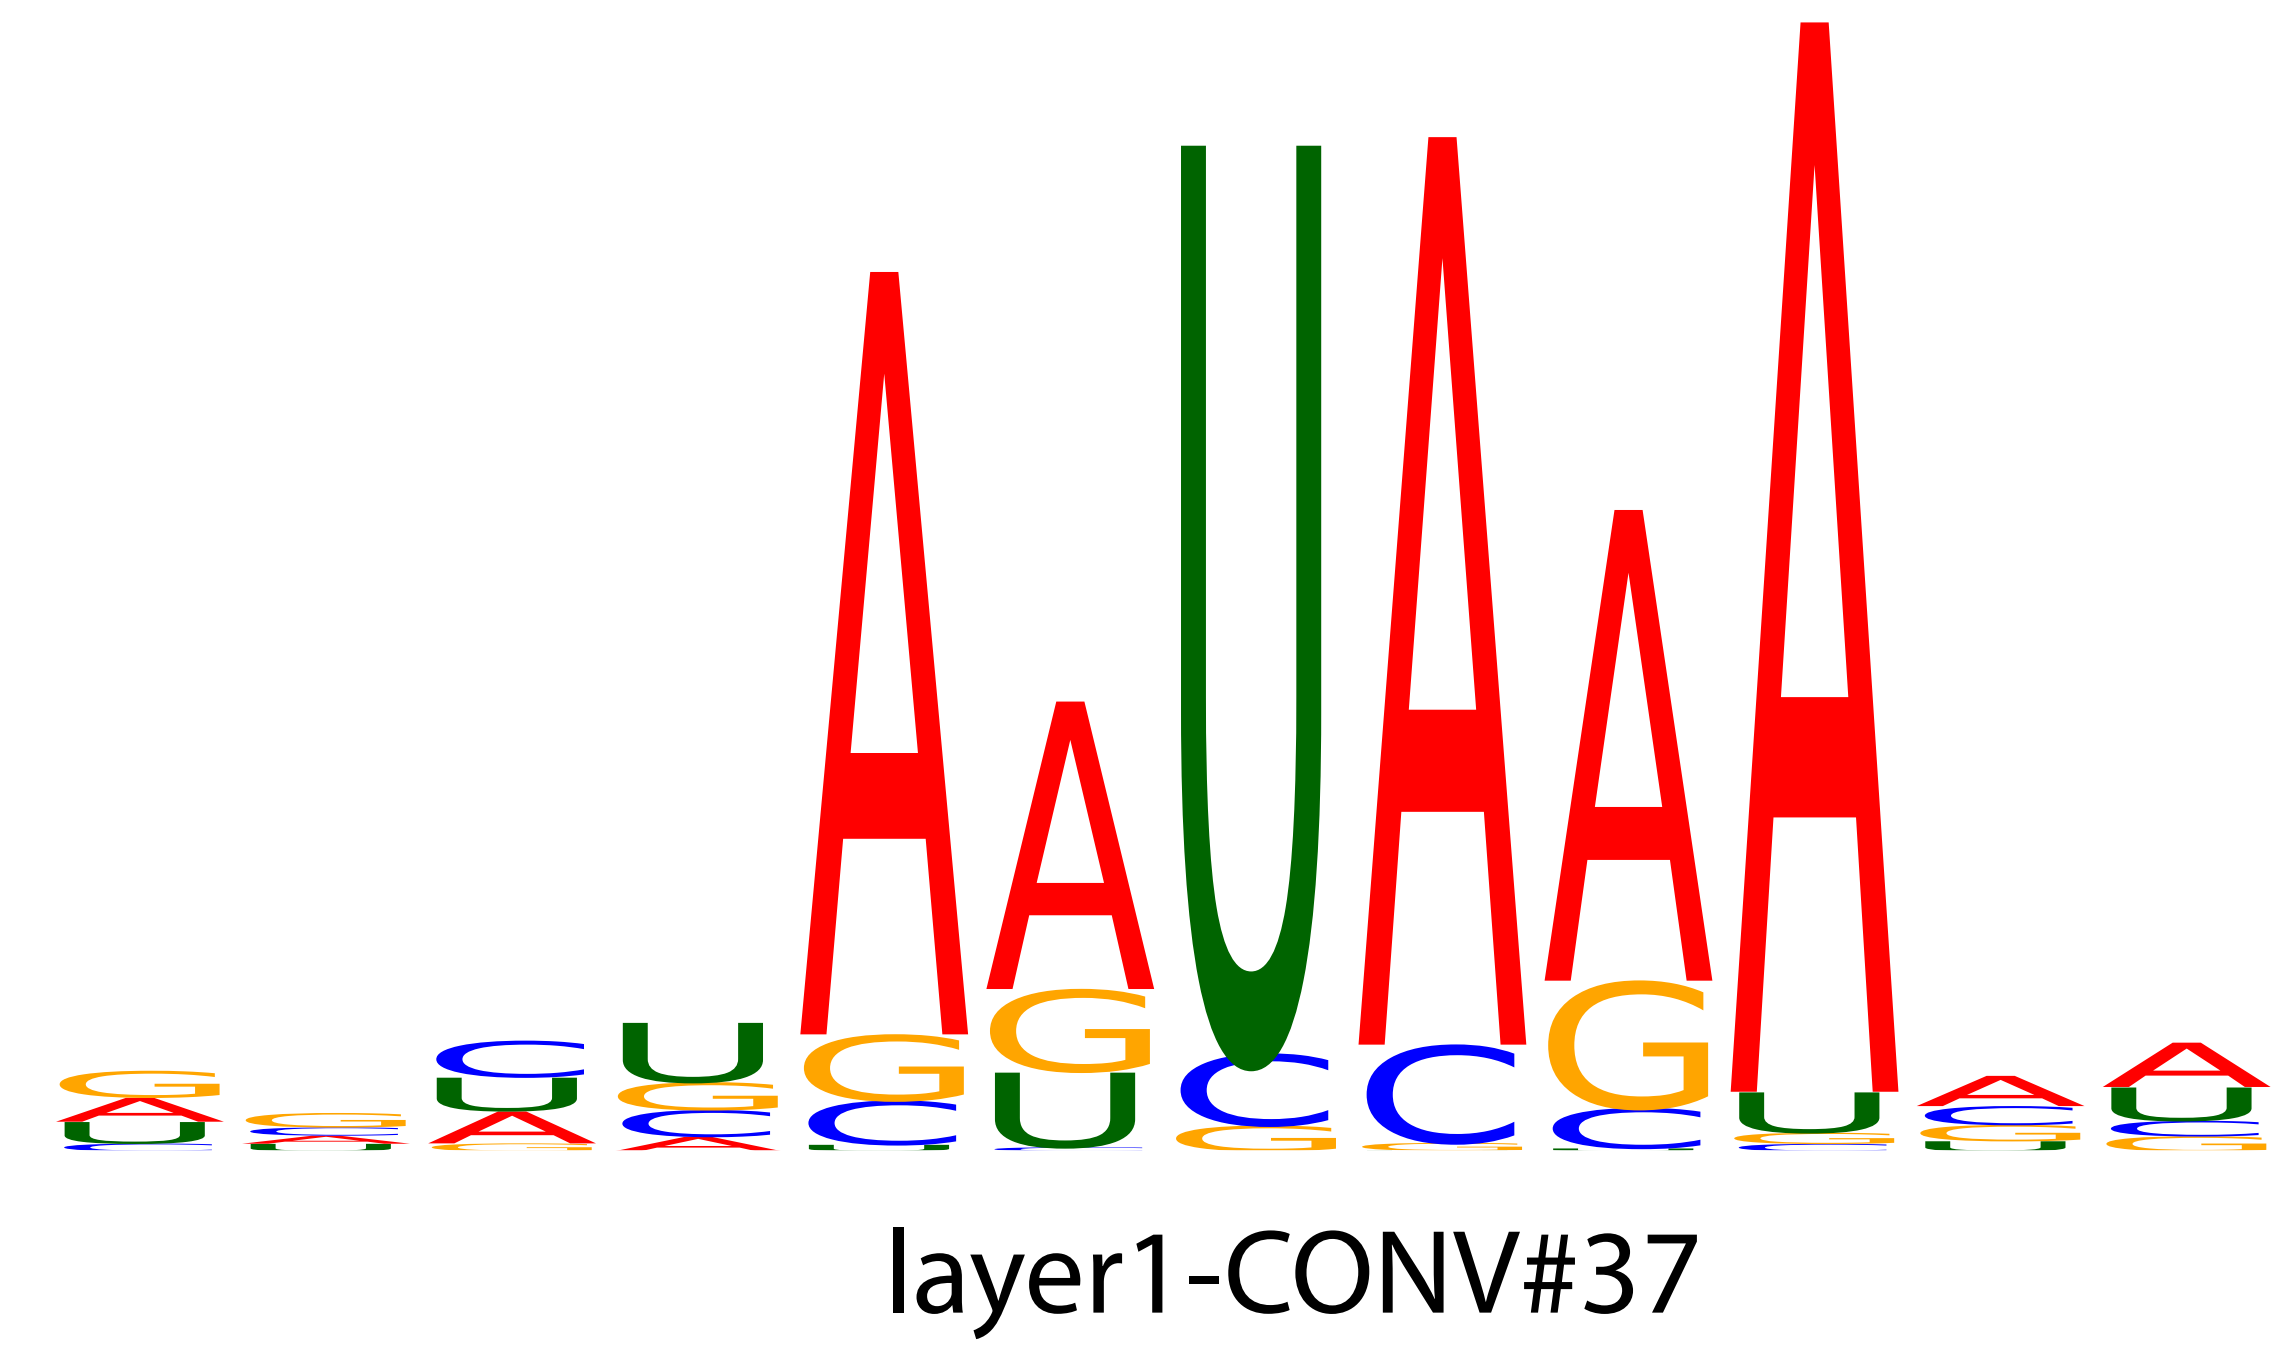

C

bioRxiv preprint doi: <https://doi.org/10.1101/2020.03.26.009373>; this version posted March 27, 2020. The copyright holder for this preprint (which was not certified by peer review) is the author/funder. All rights reserved. No reuse allowed without permission.

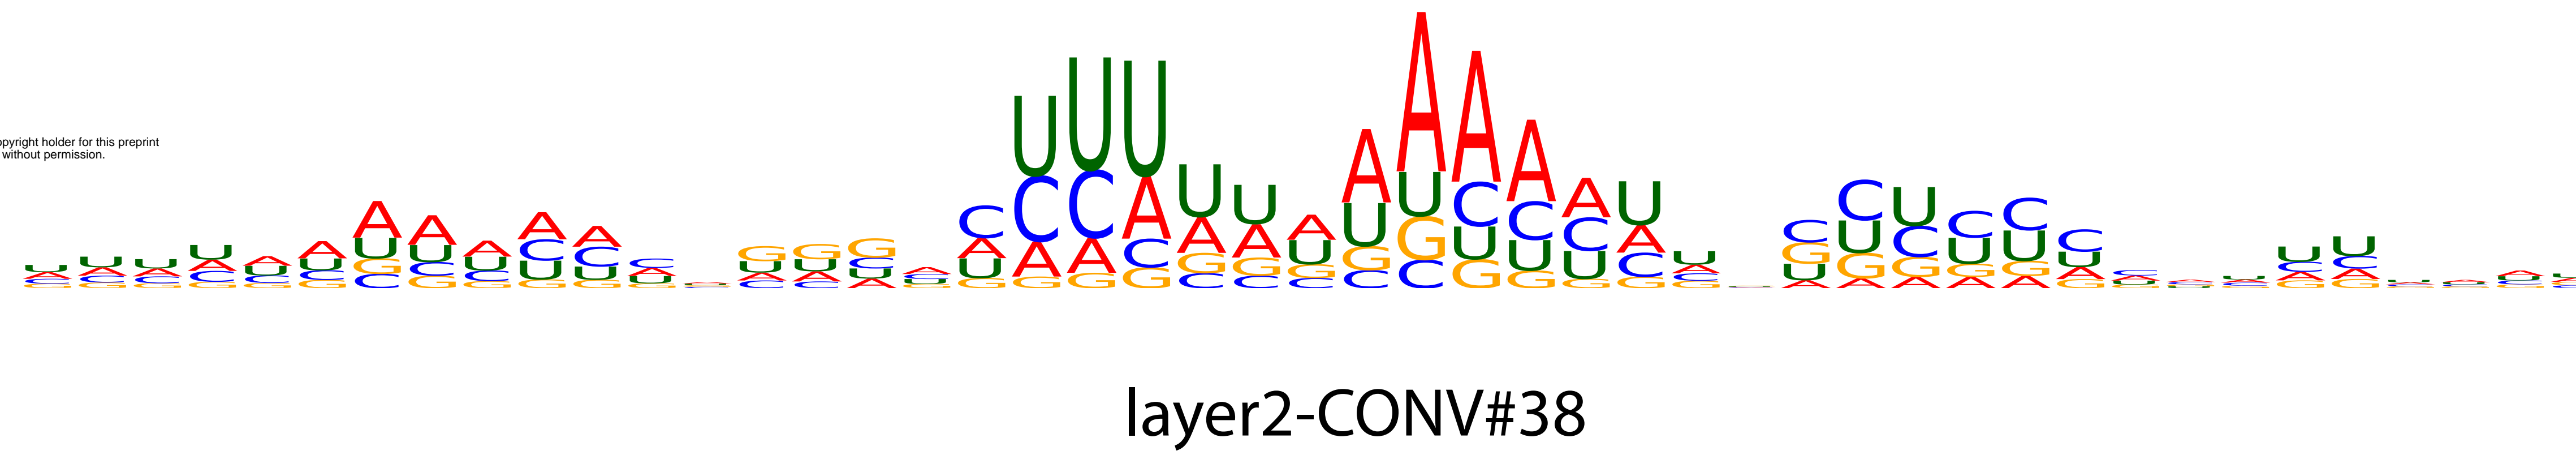

D

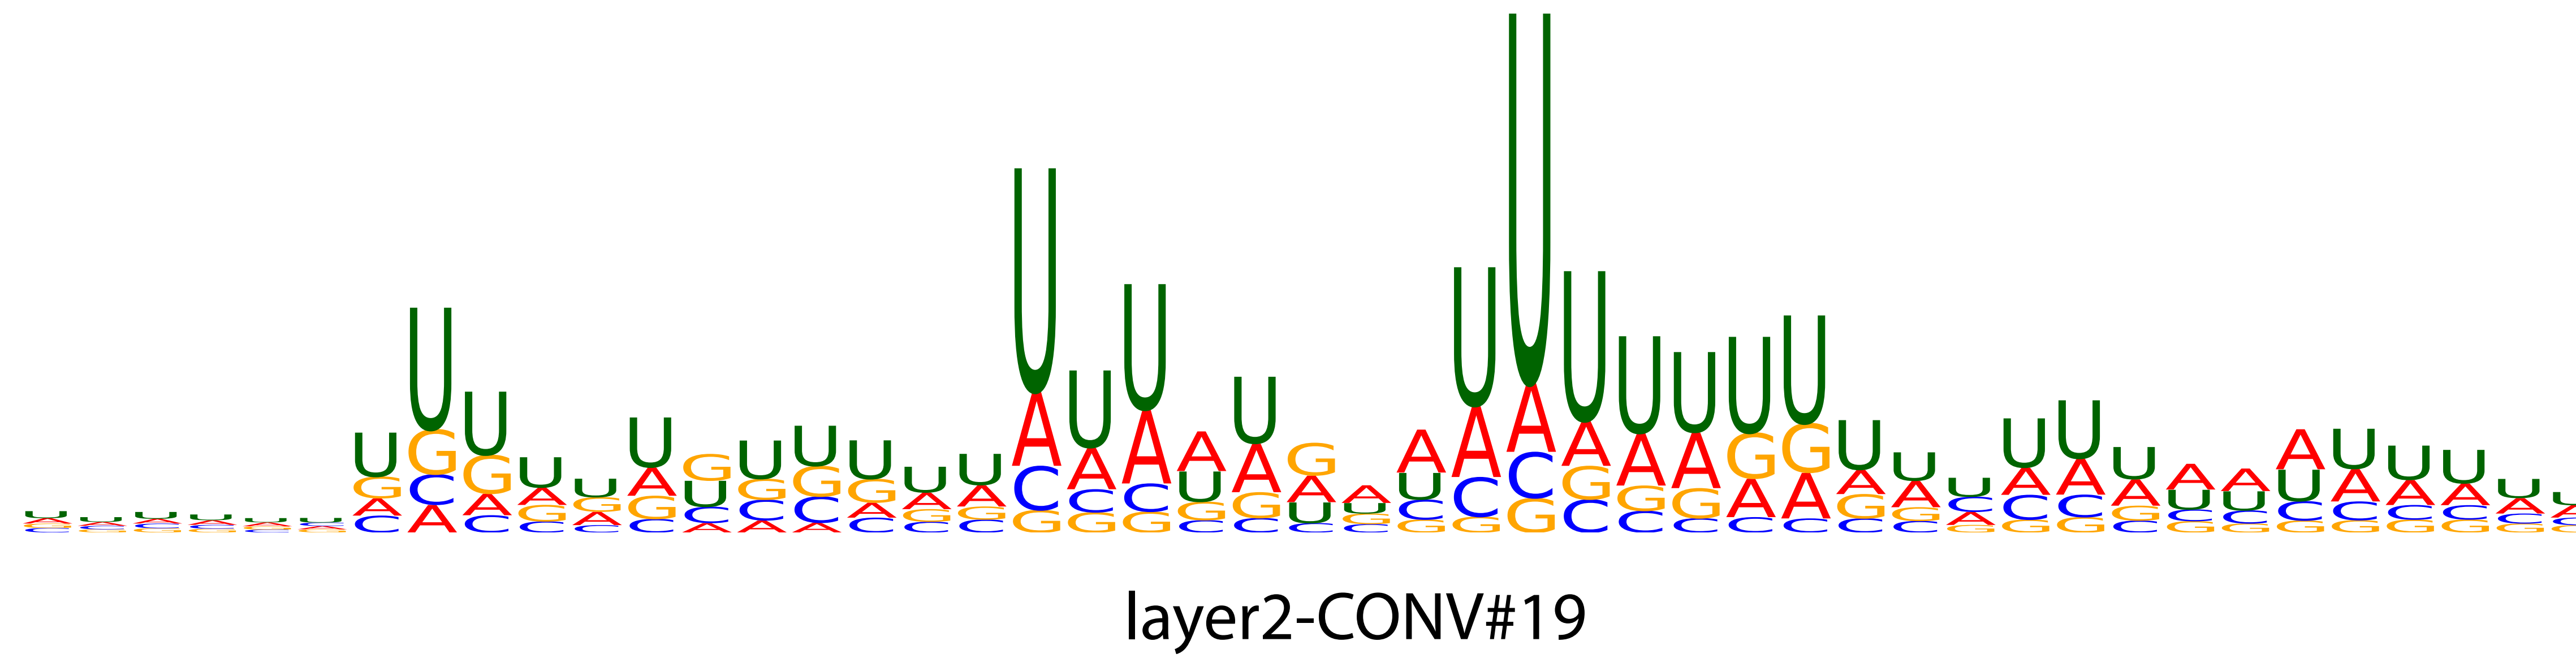

**Table 1 Performance summary for the BL parental model and the F1 model.**

A

| Model                        | Performance on Parental Dataset |                      |                                    |                                 |
|------------------------------|---------------------------------|----------------------|------------------------------------|---------------------------------|
|                              | MAE*                            | Comparison Accuracy* | Highest Usage Prediction Accuracy* | Averaged Spearman’s Correlation |
| DeeReCT-APA (Multi-Conv-Net) | <b>17.22% ± 0.3%</b>            | <b>77.64% ± 0.4%</b> | <b>63.48% ± 0.9%</b>               | <b>0.5140 ± 0.021</b>           |
| Polyadenylation Code         | N/A                             | 75.88% ± 0.8%        | 59.82% ± 1.5%                      | 0.4673 ± 0.022                  |
| DeepPASTA                    | N/A                             | 74.08% ± 1.1%        | 58.78% ± 1.4%                      | 0.4394 ± 0.017                  |

\*The values for a random predictor are 43.12%, 50.00% and 25.49% respectively. MAE, mean absolute error. Note that for MAE, it is the *lower* the better.

B

| Model                        | Performance on F1 Dataset |                      |                                    |                                 |
|------------------------------|---------------------------|----------------------|------------------------------------|---------------------------------|
|                              | MAE*                      | Comparison Accuracy* | Highest Usage Prediction Accuracy* | Averaged Spearman’s Correlation |
| DeeReCT-APA (Multi-Conv-Net) | <b>17.80% ± 0.3%</b>      | <b>77.14% ± 1.2%</b> | <b>64.52% ± 0.7%</b>               | <b>0.4567 ± 0.009</b>           |
| Polyadenylation Code         | N/A                       | 74.20% ± 0.1%        | 59.04% ± 0.9%                      | 0.4224 ± 0.014                  |
| DeepPASTA                    | N/A                       | 70.14% ± 1.5%        | 53.82% ± 1.7%                      | 0.3693 ± 0.018                  |

\*The values for a random predictor are 40.96%, 50.00% and 28.56% respectively. MAE, mean absolute error. Note that for MAE, it is the *lower* the better.

*Note:* The parental model is trained from scratch and the F1 model is fine-tuned from the BL parental model. The table shows the performance of three models across four evaluation metrics. Results are shown in the mean±std format. The best performance is in bold. See Section “Overall performance” for details. A. Performance on the Parental Dataset (BL). B. Performance on the F1 Dataset (fine-tuned from parental BL model).

**Table 2 The performance of DeeReCT-APA using different interaction layers**

A

| Model                                                     | Performance on Parental Dataset |                      |                                    |                                 |
|-----------------------------------------------------------|---------------------------------|----------------------|------------------------------------|---------------------------------|
|                                                           | MAE*                            | Comparison Accuracy* | Highest Usage Prediction Accuracy* | Averaged Spearman's Correlation |
| DeeReCT-APA<br>(Multi-Conv-Net)<br>(No Interaction Layer) | -                               | 76.12% ± 0.5%        | 60.02% ± 0.7%                      | 0.4988 ± 0.027                  |
| DeeReCT-APA<br>(Multi-Conv-Net)<br>(w/o BiLSTM)           | 17.54% ± 0.3%                   | 77.12% ± 0.5%        | 61.73% ± 0.6%                      | 0.5007 ± 0.034                  |
| DeeReCT-APA<br>(Multi-Conv-Net)<br>(BiLSTM)               | <b>17.22% ± 0.3%</b>            | <b>77.64% ± 0.4%</b> | <b>63.48% ± 0.9%</b>               | <b>0.5140 ± 0.021</b>           |

\* The values for a random predict or are 43.12%, 50.00% and 25.49% respectively. MAE, mean absolute error. Note that for MAE, it is the lower the better.

B

| Model                                                     | Performance on F1 Dataset |                      |                                    |                                 |
|-----------------------------------------------------------|---------------------------|----------------------|------------------------------------|---------------------------------|
|                                                           | MAE*                      | Comparison Accuracy* | Highest Usage Prediction Accuracy* | Averaged Spearman's Correlation |
| DeeReCT-APA<br>(Multi-Conv-Net)<br>(No Interaction Layer) | -                         | 76.28% ± 1.1%        | 61.72% ± 0.8%                      | 0.4337 ± 0.019                  |
| DeeReCT-APA<br>(Multi-Conv-Net)<br>(w/o BiLSTM)           | 18.03% ± 0.2%             | 76.77% ± 1.0%        | 63.44% ± 0.3%                      | 0.4751 ± 0.011                  |
| DeeReCT-APA<br>(Multi-Conv-Net)<br>(BiLSTM)               | <b>17.80% ± 0.4%</b>      | <b>77.14% ± 1.2%</b> | <b>64.52% ± 0.7%</b>               | <b>0.4957 ± 0.009</b>           |

\*The values for a random predictor are 40.96%, 50.00% and 28.56% respectively. MAE, mean absolute error. Note that for MAE, it is the lower the better.

*Note:* The table shows the performance of DeeReCT-APA with different interaction layers. Note that for DeeReCT-APA without interaction layer, the model is trained based on comparison and its output cannot



be interpreted as a percentage score. Therefore, like for Polyadenylation Code and DeepPASTA earlier, we do not report its MAE value. A. Performance on the Parental Dataset (BL). B. Performance on the F1 Dataset (fine-tuned from parental BL model).
